# Supplementary material for: Transcriptome Analysis of Sweet Cherry (Prunus avium L.) Cultivar ‘Lapins’ upon Infection of Pseudomonas syringae pv. syringae
Source: MDPI journal article supplement (doi:10.3390/plants12213718), 2023-10-29
Supplement: s1 [file s1]

## Sheet: S3_local_A1M3
Supplementary Table S3. The differentially expressed genes from the local samples of sweet cherry inoculated with Pss strain A1M3.
No. protein	Gene	Gene ID (LOC)	Protein ID	Size (aa)	Description	Max group mean	Log₂ fold change	Fold change	P-value	FDR p-value	Bonferroni
12	XM_021961134.1	LOC110757671	XP_021816826.1	502	ubiquitin carboxyl-terminal hydrolase 27 isoform X3	3.67	8.88	472.24	0.00116	0.05	1
78	XM_021961474.1	LOC110759396	XP_021817166.1	473	high affinity nitrate transporter 2.7	28.52	1.72	3.3	0.000554	0.03	1
119	XM_021956171.1	LOC110754996	XP_021811863.1	452	protease Do-like 1, chloroplastic	46.48	-1.19	-2.28	0.000696	0.03	1
160	XM_021964030.1	LOC110761517	XP_021819722.1	309	uncharacterized protein LOC110761517	18.06	1.92	3.78	9.72e-06	0.00165	0.3
225	XM_021958758.1	LOC110757105	XP_021814450.1	1110	zinc transporter 5 isoform X2	9.38	11.28	2483.2	7.35e-06	0.00134	0.23
253	XM_021972018.1	LOC110768183	XP_021827710.1	613	uncharacterized protein LOC110768183 isoform X2	9.03	-2.64	-6.22	0.000613	0.03	1
274	XM_021977603.1	LOC110773071	XP_021833295.1	221	heme-binding protein 2-like	104.59	-1.1	-2.15	0.000894	0.04	1
315	XM_021978008.1	LOC110773456	XP_021833700.1	215	uncharacterized protein DDB_G0271670-like	129.92	-2.84	-7.15	1.51e-07	5.44e-05	0.00467
323	XM_021944377.1	LOC110744381	XP_021800069.1	497	hexokinase-1-like	34.25	-1.48	-2.79	4.8e-05	0.00527	1
327	XM_021949287.1	LOC110749225	XP_021804979.1	288	peroxidase 47-like	30.5	-2	-4.01	0.000423	0.02	1
533	XM_021950924.1	LOC110750576	XP_021806616.1	453	protein CLT1, chloroplastic-like	36.66	3.34	10.1	7.55e-11	8.4e-08	2.34e-06
638	XM_021951811.1	LOC110751357	XP_021807503.1	297	1-aminocyclopropane-1-carboxylate oxidase homolog 1-like isoform X2	3.07	-5.45	-43.74	0.00117	0.05	1
678	XM_021952945.1	LOC110752320	XP_021808637.1	502	galactokinase	74.01	-1.14	-2.2	0.000559	0.03	1
691	XM_021952808.1	LOC110752207	XP_021808500.1	742	uncharacterized protein LOC110752207 isoform X1	17.61	-3.24	-9.44	0.000537	0.03	1
700	XM_021953155.1	LOC110752489	XP_021808847.1	412	30S ribosomal protein S1, chloroplastic	105.71	-1.25	-2.38	0.000208	0.02	1
780	XM_021953386.1	LOC110752670	XP_021809078.1	300	uncharacterized protein LOC110752670	49.94	1.89	3.72	0.000921	0.04	1
784	XM_021953407.1	LOC110752691	XP_021809099.1	840	receptor-like protein kinase THESEUS 1	70.02	1.34	2.53	0.000227	0.02	1
822	XM_021953650.1	LOC110752889	XP_021809342.1	663	low affinity sulfate transporter 3	16.64	-2.2	-4.59	0.000376	0.02	1
871	XM_021953971.1	LOC110753149	XP_021809663.1	565	serine hydroxymethyltransferase 7-like	86.23	1.87	3.65	8.04e-05	0.00782	1
914	XM_021953781.1	LOC110752989	XP_021809473.1	467	auxin transporter-like protein 3	23.17	-2.1	-4.29	4.88e-06	0.000957	0.15
960	XM_021955297.1	LOC110754242	XP_021810989.1	909	DNA topoisomerase 3-alpha isoform X2	4.42	2.24	4.71	0.00131	0.05	1
1036	XM_021956003.1	LOC110754872	XP_021811695.1	1335	SCAR-like protein 2 isoform X2	10.42	-1.63	-3.09	0.00109	0.04	1
1044	XM_021955831.1	LOC110754723	XP_021811523.1	177	uncharacterized protein LOC110754723	165.5	-1.6	-3.03	1.55e-06	0.000382	0.05
1073	XM_021956747.1	LOC110755520	XP_021812439.1	320	uncharacterized protein LOC110755520 isoform X1	31.83	-1.97	-3.93	0.000146	0.01	1
1113	XM_021957478.1	LOC110756086	XP_021813170.1	1854	protein RST1 isoform X2	0.64	4.91	30.06	0.000303	0.02	1
1201	XM_021957416.1	LOC110756033	XP_021813108.1	330	zinc finger protein CONSTANS-LIKE 6 isoform X2	30.63	-1.85	-3.61	3.35e-06	0.000692	0.1
1202	XM_021957407.1	LOC110756033	XP_021813099.1	330	zinc finger protein CONSTANS-LIKE 6 isoform X1	30.33	-2.1	-4.28	2.39e-07	7.98e-05	0.0074
1274	XM_021959203.1	LOC110757548	XP_021814895.1	348	transcription factor bHLH137-like	7.31	-2.21	-4.64	0.000658	0.03	1
1275	XM_021959213.1	LOC110757557	XP_021814905.1	348	transcription factor bHLH137-like	8.55	-2.35	-5.1	0.00036	0.02	1
1278	XM_021958854.1	LOC110757277	XP_021814546.1	352	mitochondrial phosphate carrier protein 2, mitochondrial isoform X1	11.1	2.2	4.59	5.51e-05	0.0058	1
1298	XM_021959154.1	LOC110757521	XP_021814846.1	323	magnesium protoporphyrin IX methyltransferase, chloroplastic	51.7	-1.34	-2.53	0.000199	0.01	1
1336	XM_021959664.1	LOC110757910	XP_021815356.1	544	la-related protein 1C-like	127.47	1.97	3.92	1.41e-05	0.00217	0.44
1365	XM_021960050.1	LOC110758237	XP_021815742.1	1242	histidine kinase 1 isoform X2	33.44	-1.99	-3.98	1.66e-08	7.64e-06	0.000514
1380	XM_021959456.1	LOC110757745	XP_021815148.1	737	oligopeptide transporter 7-like	23.43	1.41	2.65	0.00102	0.04	1
1423	XM_021960027.1	LOC110758216	XP_021815719.1	190	histone H1	1529.95	-2.14	-4.41	1.6e-08	7.48e-06	0.000495
1435	XM_021960494.1	LOC110758586	XP_021816186.1	486	probable serine protease EDA2 isoform X2	6.93	-2.76	-6.76	0.00072	0.03	1
1453	XM_021960091.1	LOC110758263	XP_021815783.1	769	uncharacterized protein LOC110758263 isoform X2	2.7	-3.93	-15.19	0.000203	0.02	1
1527	XM_021961664.1	LOC110759579	XP_021817356.1	501	cytochrome P450 81E8-like	68.22	-1.27	-2.41	0.000346	0.02	1
1541	XM_021961881.1	LOC110759758	XP_021817573.1	386	zinc finger protein CONSTANS-LIKE 2	26.44	1.58	2.98	0.000838	0.04	1
1611	XM_021962533.1	LOC110760280	XP_021818225.1	1235	xanthine dehydrogenase 1-like isoform X2	1.79	9.15	567.66	0.000427	0.02	1
1612	XM_021962538.1	LOC110760280	XP_021818230.1	1235	xanthine dehydrogenase 1-like isoform X2	1.62	7.53	185.06	1.98e-05	0.00277	0.61
1649	XM_021962995.1	LOC110760690	XP_021818687.1	443	IAA-amino acid hydrolase ILR1-like 1	9.51	3.38	10.38	0.000716	0.03	1
1898	XM_021965872.1	LOC110763113	XP_021821564.1	426	SNF1-related protein kinase regulatory subunit gamma-1	49.72	-1.46	-2.76	2.99e-05	0.00364	0.92
1932	XM_021966766.1	LOC110763881	XP_021822458.1	393	S-adenosylmethionine synthase 5	859.56	1.21	2.32	0.000714	0.03	1
1965	XM_021966849.1	LOC110763949	XP_021822541.1	305	late embryogenesis abundant protein, group 3-like	438.89	1.14	2.2	0.000867	0.04	1
1971	XM_021966338.1	LOC110763542	XP_021822030.1	637	5'-nucleotidase domain-containing protein 4-like	38.55	-1.14	-2.21	0.000455	0.03	1
1998	XM_021966896.1	LOC110763999	XP_021822588.1	720	SWI/SNF-related matrix-associated actin-dependent regulator of chromatin subfamily A-like protein 1 isoform X1	2.79	-4.6	-24.18	1.15e-06	0.000294	0.04
2038	XM_021967075.1	LOC110764157	XP_021822767.1	406	probable serine/threonine-protein kinase PBL7	42.75	-1.29	-2.45	0.0012	0.05	1
2151	XM_021967987.1	LOC110764921	XP_021823679.1	151	glutaredoxin-C6-like isoform X3	20.59	3.1	8.59	0.000242	0.02	1
2153	XM_021968007.1	LOC110764949	XP_021823699.1	543	protein indeterminate-domain 7-like isoform X1	1.96	4.79	27.7	0.00119	0.05	1
2155	XM_021968024.1	LOC110764949	XP_021823716.1	523	protein indeterminate-domain 7-like isoform X2	46.52	-1.24	-2.36	0.00108	0.04	1
2183	XM_021968533.1	LOC110765395	XP_021824225.1	941	glutamate receptor 2.8-like isoform X2	2.3	11.91	3851.13	2.34e-06	0.000525	0.07
2188	XM_021968100.1	LOC110765049	XP_021823792.1	272	calcineurin B-like protein 10	77.58	-1.45	-2.74	9.02e-05	0.00854	1
2199	XM_021969556.1	LOC110766263	XP_021825248.1	543	4-coumarate--CoA ligase-like 7	24.9	1.41	2.66	5.82e-05	0.00609	1
2237	XM_021969674.1	LOC110766355	XP_021825366.1	400	uncharacterized protein LOC110766355	74.66	1.9	3.72	0.000605	0.03	1
2312	XM_021969994.1	LOC110766624	XP_021825686.1	507	cytochrome P450 704C1-like isoform X1	21.56	-1.99	-3.97	9.45e-05	0.00885	1
2323	XM_021970085.1	LOC110766707	XP_021825777.1	536	synaptotagmin-5 isoform X2	12.03	5.3	39.45	0.000303	0.02	1
2414	XM_021970894.1	LOC110767366	XP_021826586.1	287	probable aquaporin PIP2-5	830.5	2.43	5.39	6.23e-13	1.11e-09	1.93e-08
2423	XM_021971428.1	LOC110767771	XP_021827120.1	674	auxin response factor 18-like isoform X2	17.94	1.58	2.98	0.000382	0.02	1
2424	XM_021971420.1	LOC110767771	XP_021827112.1	674	auxin response factor 18-like isoform X1	16.25	1.42	2.68	0.000807	0.04	1
2440	XM_021971014.1	LOC110767468	XP_021826706.1	723	phenylalanine ammonia-lyase 1	135.02	1.54	2.91	0.000494	0.03	1
2482	XM_021971777.1	LOC110768086	XP_021827469.1	243	protein FD-like isoform X1	26.59	-5.89	-59.26	1.03e-08	5.59e-06	0.000318
2507	XM_021972129.1	LOC110768395	XP_021827821.1	1847	uncharacterized protein LOC110768395	10.8	1.38	2.6	4.5e-05	0.00504	1
2551	XM_021972716.1	LOC110768849	XP_021828408.1	77	metallothionein-like protein type 2	81.26	-2.37	-5.18	8.12e-05	0.00783	1
2559	XM_021972901.1	LOC110768997	XP_021828593.1	610	probable protein phosphatase 2C 4 isoform X2	6	8.9	478.81	0.000892	0.04	1
2622	XM_021973366.1	LOC110769397	XP_021829058.1	363	uncharacterized protein LOC110769397	11.11	-2.1	-4.29	6.66e-05	0.00678	1
2626	XM_021973746.1	LOC110769711	XP_021829438.1	272	chlorophyll a-b binding protein, chloroplastic	325.72	-1.07	-2.1	0.000552	0.03	1
2634	XM_021973392.1	LOC110769422	XP_021829084.1	507	CTD small phosphatase-like protein 2 isoform X1	4.49	5.33	40.34	2.21e-05	0.00295	0.68
2728	XM_021974248.1	LOC110770159	XP_021829940.1	178	glycine-rich RNA-binding protein-like isoform X1	1922.49	2.5	5.66	3.66e-05	0.00428	1
3042	XM_021978161.1	LOC110773625	XP_021833853.1	548	D-2-hydroxyglutarate dehydrogenase, mitochondrial isoform X2	6.16	3.63	12.42	0.000119	0.01	1
3065	XM_021977960.1	LOC110773433	XP_021833652.1	331	cold shock protein CS66-like	1469.64	1.19	2.29	0.000256	0.02	1
3339	XM_021945718.1	LOC110745590	XP_021801410.1	270	peptidyl-prolyl cis-trans isomerase FKBP17-2, chloroplastic	15.91	-2.63	-6.2	3.1e-05	0.00376	0.96
3426	XM_021946837.1	LOC110746604	XP_021802529.1	206	zinc-finger homeodomain protein 11-like	32.35	-1.98	-3.94	0.00121	0.05	1
3495	XM_021947370.1	LOC110747169	XP_021803062.1	284	succinate--CoA ligase ADP-forming; subunit alpha-2, mitochondrial isoform X2	15.61	10.02	1041.37	0.00053	0.03	1
3665	XM_021948752.1	LOC110748796	XP_021804444.1	119	uncharacterized protein LOC110748796	20.12	-3.09	-8.5	2.07e-05	0.00285	0.64
3669	XM_021948763.1	LOC110748805	XP_021804455.1	665	boron transporter 4-like isoform X1	4.37	2.97	7.85	0.00126	0.05	1
3782	XM_021948857.1	LOC110748888	XP_021804549.1	370	3-hydroxy-3-methylglutaryl-coenzyme A reductase 2	42.48	1.94	3.84	6.65e-05	0.00678	1
3785	XM_021948858.1	LOC110748889	XP_021804550.1	560	3-hydroxy-3-methylglutaryl-coenzyme A reductase-like	106.23	1.69	3.23	0.000293	0.02	1
3834	XM_021948968.1	LOC110748978	XP_021804660.1	379	early nodulin-75-like	49.43	-2.28	-4.86	0.000279	0.02	1
3869	XM_021948943.1	LOC110748959	XP_021804635.1	461	casein kinase 1-like protein 10 isoform X4	23.02	-1.58	-3	0.000993	0.04	1
3928	XM_021949070.1	LOC110749052	XP_021804762.1	799	G-type lectin S-receptor-like serine/threonine-protein kinase At4g27290 isoform X2	1.84	-5.42	-42.7	0.000729	0.03	1
4017	XM_021949238.1	LOC110749192	XP_021804930.1	369	nucleosome assembly protein 1;2-like isoform X2	47.21	2.37	5.17	3.1e-07	9.85e-05	0.0096
4023	XM_021949218.1	LOC110749181	XP_021804910.1	930	uncharacterized protein LOC110749181 isoform X4	2.85	9.29	628.04	0.000395	0.02	1
4086	XM_021949278.1	LOC110749219	XP_021804970.1	170	uncharacterized protein LOC110749219	100.61	-1.96	-3.9	4.15e-08	1.79e-05	0.00128
4162	XM_021949141.1	LOC110749123	XP_021804833.1	267	photosystem I chlorophyll a/b-binding protein 6, chloroplastic	17.47	-2.12	-4.34	2.25e-05	0.00297	0.7
4334	XM_021949423.1	LOC110749336	XP_021805115.1	810	sucrose synthase 3	592.31	1.51	2.84	2.88e-06	0.00062	0.09
4368	XM_021949524.1	LOC110749414	XP_021805216.1	257	UDP-glucuronic acid decarboxylase 2-like	372.68	4.33	20.12	8.98e-06	0.00157	0.28
4388	XM_021949548.1	LOC110749434	XP_021805240.1	425	fatty-acid-binding protein 2	2.12	4.22	18.61	0.000314	0.02	1
4405	XM_021949609.1	LOC110749497	XP_021805301.1	424	probable WRKY transcription factor protein 1	8.38	-3.35	-10.21	0.000495	0.03	1
4425	XM_021949567.1	LOC110749454	XP_021805259.1	987	glutamate receptor 2.8-like	8.24	3	7.99	1.32e-05	0.00208	0.41
4476	XM_021949698.1	LOC110749579	XP_021805390.1	487	anthocyanidin 3-O-glucosyltransferase 2-like	9.9	1.64	3.12	0.000829	0.04	1
4513	XM_021949661.1	LOC110749547	XP_021805353.1	108	protein RESPONSE TO LOW SULFUR 2-like	267.44	3.29	9.78	2.47e-05	0.00315	0.76
4551	XM_021949757.1	LOC110749613	XP_021805449.1	316	ribosome-binding factor PSRP1, chloroplastic	29.8	-1.82	-3.54	4.07e-05	0.00462	1
4583	XM_021949830.1	LOC110749676	XP_021805522.1	219	homeobox-leucine zipper protein ATHB-12-like	82.04	-2.22	-4.67	0.000107	0.00974	1
4604	XM_021949664.1	LOC110749549	XP_021805356.1	2059	MAG2-interacting protein 2 isoform X2	2.07	10.4	1347.35	3.25e-05	0.00391	1
4650	XM_021949844.1	LOC110749688	XP_021805536.1	448	galactomannan galactosyltransferase 1-like	83.19	1.72	3.29	6.61e-05	0.00678	1
4701	XM_021949934.1	LOC110749756	XP_021805626.1	276	transcription factor bHLH51	46.74	-1.54	-2.92	0.000265	0.02	1
4733	XM_021949917.1	LOC110749744	XP_021805609.1	567	phosphoinositide phospholipase C 6-like	6.32	2.53	5.8	7.38e-05	0.00735	1
4831	XM_021950023.1	LOC110749827	XP_021805715.1	403	chloroplast stem-loop binding protein of 41 kDa a, chloroplastic	25.25	-1.42	-2.68	0.000502	0.03	1
5112	XM_021950372.1	LOC110750099	XP_021806064.1	149	photosystem I reaction center subunit IV B, chloroplastic	202.36	-1.94	-3.84	9.13e-09	5.21e-06	0.000283
5245	XM_021950567.1	LOC110750267	XP_021806259.1	103	late embryogenesis abundant protein Lea5	42.96	-2.23	-4.68	0.000371	0.02	1
5252	XM_021950494.1	LOC110750206	XP_021806186.1	155	uncharacterized protein LOC110750206	178.32	-1.77	-3.4	2.3e-05	0.00302	0.71
5351	XM_021950639.1	LOC110750330	XP_021806331.1	725	arginine decarboxylase	237.6	1.54	2.91	0.000233	0.02	1
5353	XM_021950638.1	LOC110750328	XP_021806330.1	310	NADP-dependent D-sorbitol-6-phosphate dehydrogenase-like	296.51	2.14	4.4	5.41e-10	4.48e-07	1.67e-05
5471	XM_021950755.1	LOC110750423	XP_021806447.1	1567	uncharacterized protein LOC110750423	7.22	1.22	2.33	0.000753	0.03	1
5527	XM_021950767.1	LOC110750430	XP_021806459.1	424	basic 7S globulin-like	11.59	-5.52	-45.99	9.21e-07	0.000239	0.03
5535	XM_021950771.1	LOC110750434	XP_021806463.1	236	stem-specific protein TSJT1	471.44	-1.77	-3.41	1.99e-06	0.000454	0.06
5539	XM_021950830.1	LOC110750485	XP_021806522.1	374	ATP-dependent (S)-NAD(P)H-hydrate dehydratase isoform X1	34.62	-1.69	-3.23	0.000466	0.03	1
5566	XM_021950963.1	LOC110750607	XP_021806655.1	849	uncharacterized protein LOC110750607 isoform X1	9.45	1.6	3.04	0.00031	0.02	1
5701	XM_021951001.1	LOC110750642	XP_021806693.1	580	protein VASCULAR ASSOCIATED DEATH 1, chloroplastic	233.09	1.97	3.91	7.54e-09	4.47e-06	0.000234
5723	XM_021951046.1	LOC110750688	XP_021806738.1	809	ribonucleoside-diphosphate reductase large subunit isoform X1	1.47	8.82	453.36	0.000856	0.04	1
5834	XM_021951135.1	LOC110750773	XP_021806827.1	230	uncharacterized protein LOC110750773	147.9	-1.24	-2.36	0.000131	0.01	1
5865	XM_021951152.1	LOC110750787	XP_021806844.1	505	trans-cinnamate 4-monooxygenase	444.3	1.68	3.2	1.62e-06	0.000397	0.05
5924	XM_021951233.1	LOC110750857	XP_021806925.1	569	beta-amylase 1, chloroplastic isoform X1	631.11	1.24	2.36	0.000789	0.04	1
6004	XM_021951496.1	LOC110751077	XP_021807188.1	725	leucine-rich repeat extensin-like protein 4 isoform X1	53.38	2.24	4.72	2.22e-05	0.00295	0.69
6005	XM_021951497.1	LOC110751077	XP_021807189.1	725	leucine-rich repeat extensin-like protein 4 isoform X2	55.41	2.29	4.89	1.98e-05	0.00277	0.61
6050	XM_021951462.1	LOC110751045	XP_021807154.1	430	casein kinase 1-like protein 3 isoform X2	41.25	-1.78	-3.43	0.000463	0.03	1
6394	XM_021951720.1	LOC110751279	XP_021807412.1	1393	cell division cycle and apoptosis regulator protein 1	21.45	1.15	2.22	0.000158	0.01	1
6504	XM_021951901.1	LOC110751428	XP_021807593.1	903	alpha-amylase 3, chloroplastic isoform X2	265.51	1.18	2.26	0.000227	0.02	1
6560	XM_021951968.1	LOC110751494	XP_021807660.1	705	uncharacterized protein LOC110751494 isoform X1	20.38	1.6	3.04	0.000794	0.04	1
6594	XM_021951971.1	LOC110751497	XP_021807663.1	525	cytochrome P450 71A24-like	15.02	-2.52	-5.73	0.000117	0.01	1
6614	XM_021952015.1	LOC110751540	XP_021807707.1	216	uncharacterized protein LOC110751540	1060.53	3.98	15.81	1.98e-06	0.000454	0.06
6686	XM_021952108.1	LOC110751607	XP_021807800.1	231	ethylene-responsive transcription factor 3	172.72	2.03	4.08	8.05e-05	0.00782	1
6711	XM_021952147.1	LOC110751645	XP_021807839.1	159	ribonuclease 3-like protein 1	19.05	-2.43	-5.41	0.000596	0.03	1
6810	XM_021952287.1	LOC110751778	XP_021807979.1	579	jasmonic acid-amido synthetase JAR1	42.18	-1.27	-2.4	0.000134	0.01	1
6811	XM_021952289.1	LOC110751778	XP_021807981.1	579	jasmonic acid-amido synthetase JAR1	42.5	-1.32	-2.49	0.000127	0.01	1
6812	XM_021952290.1	LOC110751778	XP_021807982.1	579	jasmonic acid-amido synthetase JAR1	42.34	-1.26	-2.39	0.000243	0.02	1
6843	XM_021952271.1	LOC110751766	XP_021807963.1	300	acidic endochitinase-like	315.6	-2.44	-5.42	2.79e-05	0.00347	0.86
6865	XM_021952252.1	LOC110751747	XP_021807944.1	344	uncharacterized protein LOC110751747 isoform X2	11.34	10.1	1094.03	9.99e-05	0.00927	1
6872	XM_021952367.1	LOC110751837	XP_021808059.1	251	uncharacterized protein LOC110751837	191.85	-1.96	-3.9	9.36e-08	3.62e-05	0.0029
6880	XM_021952266.1	LOC110751762	XP_021807958.1	257	reticulon-like protein B6	1326.42	1.15	2.22	0.000877	0.04	1
6886	XM_021952301.1	LOC110751786	XP_021807993.1	148	desiccation protectant protein Lea14 homolog	308.75	1.27	2.41	0.000257	0.02	1
6887	XM_021952302.1	LOC110751787	XP_021807994.1	148	desiccation protectant protein Lea14 homolog	162.36	2.3	4.93	1.86e-07	6.43e-05	0.00575
6915	XM_021952399.1	LOC110751868	XP_021808091.1	475	probable polygalacturonase	194.59	-3.37	-10.36	2.24e-22	1.49e-18	6.93e-18
6996	XM_021952549.1	LOC110751971	XP_021808241.1	304	28 kDa ribonucleoprotein, chloroplastic	45.74	-1.72	-3.29	4.61e-06	0.000911	0.14
7052	XM_021952486.1	LOC110751928	XP_021808178.1	737	WD and tetratricopeptide repeats protein 1 isoform X3	5.2	-6.91	-120.39	1.49e-05	0.00227	0.46
7082	XM_021952571.1	LOC110751997	XP_021808263.1	443	aspartyl protease AED3	9.53	-3.66	-12.62	4.41e-07	0.000132	0.01
7109	XM_021952416.1	LOC110751888	XP_021808108.1	445	MADS-box protein JOINTLESS-like isoform X4	226.95	4.14	17.64	1.36e-08	6.73e-06	0.000421
7147	XM_021952631.1	LOC110752046	XP_021808323.1	348	uncharacterized protein LOC110752046	6.16	-2.4	-5.26	0.000195	0.01	1
7187	XM_021952668.1	LOC110752079	XP_021808360.1	597	protein NRT1/ PTR FAMILY 2.11-like	154.1	2.35	5.09	1.08e-11	1.3e-08	3.33e-07
7285	XM_021952755.1	LOC110752151	XP_021808447.1	673	protein PLASTID TRANSCRIPTIONALLY ACTIVE 10	25.68	-1.38	-2.6	0.00015	0.01	1
7421	XM_021952926.1	LOC110752308	XP_021808618.1	551	sodium/hydrogen exchanger 2-like	83.83	1.71	3.27	2.93e-07	9.53e-05	0.00907
7428	XM_021952934.1	LOC110752314	XP_021808626.1	3998	chromatin structure-remodeling complex protein SYD isoform X3	13.82	1.12	2.18	0.000468	0.03	1
7459	XM_021952970.1	LOC110752340	XP_021808662.1	361	probable receptor-like protein kinase At2g23200	9.21	-3.2	-9.17	3.78e-05	0.00435	1
7512	XM_021953022.1	LOC110752383	XP_021808714.1	170	uncharacterized protein LOC110752383	117.06	1.47	2.76	0.000147	0.01	1
7580	XM_021953086.1	LOC110752434	XP_021808778.1	1074	inositol hexakisphosphate and diphosphoinositol-pentakisphosphate kinase VIP1-like isoform X1	1.61	-3.66	-12.61	0.000976	0.04	1
7597	XM_021953082.1	LOC110752431	XP_021808774.1	517	AAA-ATPase At3g28580-like	116.12	1.71	3.27	7.28e-07	0.000194	0.02
7641	XM_021953167.1	LOC110752503	XP_021808859.1	738	serine/arginine repetitive matrix protein 1	27.54	1.64	3.12	4.9e-05	0.00533	1
7647	XM_021953186.1	LOC110752514	XP_021808878.1	546	(R)-mandelonitrile lyase 1-like isoform X1	4.59	3.82	14.07	0.000592	0.03	1
7662	XM_021953194.1	LOC110752518	XP_021808886.1	479	xylose isomerase isoform X2	5.12	6.37	82.99	0.0011	0.04	1
7672	XM_021953205.1	LOC110752525	XP_021808897.1	454	flavonoid 3-O-glucosyltransferase-like	93.91	2.97	7.86	5.53e-10	4.48e-07	1.71e-05
7794	XM_021953370.1	LOC110752665	XP_021809062.1	777	putative chloride channel-like protein CLC-g	84.29	1.13	2.19	0.000339	0.02	1
7816	XM_021953302.1	LOC110752609	XP_021808994.1	297	repetitive proline-rich cell wall protein 1 isoform X3	94.76	1.7	3.26	0.000531	0.03	1
7818	XM_021953348.1	LOC110752646	XP_021809040.1	456	CCR4-NOT transcription complex subunit 10-like	2.89	5.7	51.91	0.00103	0.04	1
7898	XM_021953518.1	LOC110752789	XP_021809210.1	309	chitinase 2-like	15.52	-1.8	-3.48	0.000575	0.03	1
8071	XM_021953653.1	LOC110752895	XP_021809345.1	320	uncharacterized protein LOC110752895	19.92	-1.36	-2.57	0.000943	0.04	1
8191	XM_021953695.1	LOC110752931	XP_021809387.1	332	oxygen-evolving enhancer protein 1, chloroplastic	575.12	-2.17	-4.51	8.03e-11	8.58e-08	2.49e-06
8237	XM_021953796.1	LOC110753004	XP_021809488.1	474	anthocyanidin 3-O-glucosyltransferase 5-like	13.25	-1.7	-3.24	0.000812	0.04	1
8248	XM_021953877.1	LOC110753069	XP_021809569.1	624	BTB/POZ domain-containing protein At5g67385	99.11	-1.8	-3.49	1.47e-07	5.37e-05	0.00455
8278	XM_021953854.1	LOC110753050	XP_021809546.1	838	U-box domain-containing protein 4 isoform X4	4.18	9.68	818.58	0.00107	0.04	1
8409	XM_021954085.1	LOC110753229	XP_021809777.1	597	probable carotenoid cleavage dioxygenase 4, chloroplastic	27.59	-2.14	-4.4	6.43e-06	0.00122	0.2
8427	XM_021954061.1	LOC110753216	XP_021809753.1	589	pre-mRNA-processing factor 17 isoform X2	7.54	6.45	87.41	3.14e-06	0.000665	0.1
8434	XM_021954033.1	LOC110753197	XP_021809725.1	393	2-methylene-furan-3-one reductase-like	65.5	-1.09	-2.13	0.000506	0.03	1
8458	XM_021954108.1	LOC110753244	XP_021809800.1	334	uncharacterized protein LOC110753244 isoform X2	3.98	6.42	85.82	0.000832	0.04	1
8464	XM_021954021.1	LOC110753187	XP_021809713.1	339	galactinol synthase 1	156.13	2.16	4.46	7.22e-07	0.000194	0.02
8467	XM_021954119.1	LOC110753254	XP_021809811.1	335	1,4-dihydroxy-2-naphthoyl-CoA synthase, peroxisomal	37.93	-1.44	-2.71	0.000565	0.03	1
8488	XM_021954084.1	LOC110753228	XP_021809776.1	655	protein NSP-INTERACTING KINASE 3 isoform X2	27.91	-1.28	-2.43	0.000187	0.01	1
8495	XM_021954140.1	LOC110753272	XP_021809832.1	350	bifunctional UDP-glucose 4-epimerase and UDP-xylose 4-epimerase 1	70.53	-1.31	-2.48	0.000314	0.02	1
8512	XM_021954144.1	LOC110753275	XP_021809836.1	444	protein IQ-DOMAIN 14	78.59	1.64	3.13	0.000141	0.01	1
8542	XM_021954165.1	LOC110753290	XP_021809857.1	233	ethylene-responsive transcription factor ERF027-like	35.93	1.68	3.2	0.00127	0.05	1
8564	XM_021954222.1	LOC110753332	XP_021809914.1	510	flavonoid 3'-monooxygenase	601.55	1.32	2.49	0.00119	0.05	1
8704	XM_021954347.1	LOC110753437	XP_021810039.1	710	NADPH--cytochrome P450 reductase 2	174.05	1.95	3.86	5.23e-08	2.18e-05	0.00162
8732	XM_021954348.1	LOC110753438	XP_021810040.1	935	probable pre-mRNA-splicing factor ATP-dependent RNA helicase DEAH5 isoform X1	6.97	6.5	90.45	1.72e-05	0.00248	0.53
8775	XM_021954420.1	LOC110753511	XP_021810112.1	534	heat stress transcription factor A-3	20.53	1.6	3.04	0.00112	0.04	1
8897	XM_021954647.1	LOC110753702	XP_021810339.1	204	kunitz trypsin inhibitor 2-like	12.95	-4.34	-20.28	0.000631	0.03	1
8900	XM_021954629.1	LOC110753685	XP_021810321.1	1103	TMV resistance protein N-like isoform X2	3.53	7.89	236.4	3.37e-06	0.000692	0.1
8905	XM_021954605.1	LOC110753662	XP_021810297.1	269	flavin-containing monooxygenase FMO GS-OX-like 4 isoform X3	13.14	2.94	7.67	0.000676	0.03	1
8954	XM_021954596.1	LOC110753657	XP_021810288.1	682	probable LRR receptor-like serine/threonine-protein kinase At1g34110	81.4	-1.35	-2.55	7.88e-05	0.0077	1
9004	XM_021954764.1	LOC110753791	XP_021810456.1	615	protein NUCLEAR FUSION DEFECTIVE 4-like	243.66	1.39	2.63	0.000617	0.03	1
9012	XM_021954724.1	LOC110753766	XP_021810416.1	419	protein EARLY-RESPONSIVE TO DEHYDRATION 7, chloroplastic-like	172.6	1.11	2.16	0.00043	0.02	1
9016	XM_021954762.1	LOC110753789	XP_021810454.1	539	synaptotagmin-1	80.3	-1.15	-2.22	0.000333	0.02	1
9035	XM_021954716.1	LOC110753759	XP_021810408.1	684	uncharacterized protein LOC110753759	666.56	-1.28	-2.42	6.03e-05	0.00627	1
9056	XM_021954789.1	LOC110753814	XP_021810481.1	412	uncharacterized protein LOC110753814	18.33	-1.53	-2.89	0.000451	0.02	1
9076	XM_021954710.1	LOC110753755	XP_021810402.1	895	transportin-1 isoform X1	11.56	1.96	3.89	6.64e-05	0.00678	1
9104	XM_021954670.1	LOC110753722	XP_021810362.1	359	(RS)-norcoclaurine 6-O-methyltransferase-like	17.11	-2.91	-7.5	0.00123	0.05	1
9129	XM_021954884.1	LOC110753899	XP_021810576.1	325	peroxidase 4-like	135.76	-1.39	-2.61	0.000113	0.01	1
9171	XM_021954817.1	LOC110753837	XP_021810509.1	370	GDSL esterase/lipase At2g30310-like	29.54	2.28	4.87	6.02e-08	2.4e-05	0.00186
9172	XM_021954818.1	LOC110753837	XP_021810510.1	370	GDSL esterase/lipase At2g30310-like	30.04	2.54	5.8	4.84e-09	3.15e-06	0.00015
9637	XM_021955371.1	LOC110754313	XP_021811063.1	216	histone H1-like	364.38	-2.22	-4.65	1.21e-07	4.53e-05	0.00373
9679	XM_021955451.1	LOC110754390	XP_021811143.1	339	uncharacterized protein LOC110754390 isoform X4	3.63	9.56	753.67	0.000329	0.02	1
9761	XM_021955561.1	LOC110754487	XP_021811253.1	522	BTB/POZ domain-containing protein At3g22104 isoform X2	4.51	-6.43	-86.2	4.49e-07	0.000133	0.01
9789	XM_021955567.1	LOC110754495	XP_021811259.1	421	UPF0481 protein At3g47200-like	4.4	2.66	6.3	0.000968	0.04	1
9809	XM_021955578.1	LOC110754509	XP_021811270.1	791	chloride channel protein CLC-e	5.38	-2.1	-4.3	1.64e-05	0.00241	0.51
9847	XM_021955644.1	LOC110754569	XP_021811336.1	336	protein SLOW GREEN 1, chloroplastic	46.2	2.14	4.4	4.19e-05	0.00473	1
9869	XM_021955624.1	LOC110754555	XP_021811316.1	346	gibberellin 2-beta-dioxygenase 8-like	7.38	2.2	4.61	0.000475	0.03	1
9914	XM_021955668.1	LOC110754588	XP_021811360.1	4379	sacsin isoform X2	12.14	2.64	6.23	0.00043	0.02	1
10204	XM_021955992.1	LOC110754874	XP_021811684.1	267	chlorophyll a-b binding protein of LHCII type 1-like	275.98	1.37	2.58	4.29e-05	0.00483	1
10255	XM_021956088.1	LOC110754950	XP_021811780.1	657	acetolactate synthase 1, chloroplastic-like	108.83	1.63	3.1	3.16e-07	9.94e-05	0.0098
10496	XM_021956323.1	LOC110755151	XP_021812015.1	429	amino acid transporter AVT1I-like isoform X1	85.29	1.24	2.36	0.000627	0.03	1
10497	XM_021956324.1	LOC110755151	XP_021812016.1	358	amino acid transporter AVT1I-like isoform X2	23.01	2.4	5.28	2.46e-05	0.00315	0.76
10525	XM_021956368.1	LOC110755197	XP_021812060.1	566	dicarboxylate transporter 1, chloroplastic	71.45	1.71	3.28	0.000112	0.01	1
10783	XM_021956588.1	LOC110755396	XP_021812280.1	293	xyloglucan endotransglucosylase/hydrolase protein 31-like	26.46	-1.96	-3.89	0.000178	0.01	1
10839	XM_021956724.1	LOC110755507	XP_021812416.1	130	photosystem I reaction center subunit psaK, chloroplastic	67.21	-1.7	-3.24	2.85e-05	0.00352	0.88
10890	XM_021956770.1	LOC110755543	XP_021812462.1	715	CSC1-like protein HYP1 isoform X1	150.56	1.19	2.28	0.000226	0.02	1
10912	XM_021956778.1	LOC110755550	XP_021812470.1	560	KH domain-containing protein HEN4 isoform X2	14.46	5.1	34.3	0.000122	0.01	1
10951	XM_021956841.1	LOC110755615	XP_021812533.1	359	probable cinnamyl alcohol dehydrogenase 1	41.42	-1.59	-3.02	0.000447	0.02	1
10983	XM_021956853.1	LOC110755622	XP_021812545.1	662	transmembrane 9 superfamily member 12-like isoform X2	5.28	9.68	818.58	0.00107	0.04	1
10987	XM_021956858.1	LOC110755626	XP_021812550.1	276	chlorophyll a-b binding protein 8, chloroplastic	307.68	-1.11	-2.15	0.000653	0.03	1
11031	XM_021957065.1	LOC110755785	XP_021812757.1	865	stachyose synthase-like	22.52	1.61	3.06	1.05e-05	0.00173	0.32
11062	XM_021956976.1	LOC110755726	XP_021812668.1	778	DUF724 domain-containing protein 7 isoform X3	5.5	4.79	27.66	1.14e-05	0.00183	0.35
11071	XM_021956962.1	LOC110755721	XP_021812654.1	474	SWR1-complex protein 4 isoform X2	2.14	-4.39	-20.93	0.000283	0.02	1
11103	XM_021957057.1	LOC110755777	XP_021812749.1	265	chlorophyll a-b binding protein of LHCII type 1-like	165.65	-2.45	-5.47	2.15e-12	3.18e-09	6.65e-08
11183	XM_021957091.1	LOC110755805	XP_021812783.1	529	protein DETOXIFICATION 29	52.41	1.35	2.56	0.000103	0.00944	1
11192	XM_021957130.1	LOC110755842	XP_021812822.1	186	thioredoxin-like 3-1, chloroplastic	15.1	-2.82	-7.05	2.36e-05	0.00308	0.73
11307	XM_021957242.1	LOC110755918	XP_021812934.1	289	chlorophyll a-b binding protein CP26, chloroplastic	420.75	-1.17	-2.25	0.000294	0.02	1
11345	XM_021957282.1	LOC110755955	XP_021812974.1	730	uncharacterized protein LOC110755955	5.77	2.29	4.89	0.000133	0.01	1
11517	XM_021957481.1	LOC110756095	XP_021813173.1	894	probable LRR receptor-like serine/threonine-protein kinase RFK1 isoform X3	7.38	6.79	110.36	9.73e-06	0.00165	0.3
11567	XM_021957530.1	LOC110756136	XP_021813222.1	746	zinc finger CCCH domain-containing protein 53-like isoform X4	9.66	8.69	412.23	1.24e-08	6.34e-06	0.000382
11784	XM_021957777.1	LOC110756362	XP_021813469.1	313	28 kDa ribonucleoprotein, chloroplastic-like	62.41	-1.52	-2.86	9.91e-05	0.00925	1
11790	XM_021957796.1	LOC110756377	XP_021813488.1	620	probable LRR receptor-like serine/threonine-protein kinase At5g63710 isoform X1	12.62	-1.59	-3.01	0.000711	0.03	1
11798	XM_021957788.1	LOC110756371	XP_021813480.1	749	uncharacterized protein LOC110756371 isoform X2	2.78	6.85	115.49	2.31e-05	0.00302	0.71
11806	XM_021957803.1	LOC110756381	XP_021813495.1	1043	exportin-4 isoform X2	3.38	10.9	1907.37	3.71e-05	0.00432	1
11815	XM_021957871.1	LOC110756440	XP_021813563.1	118	uncharacterized protein LOC110756440	183.49	1.3	2.47	0.000222	0.02	1
11935	XM_021957951.1	LOC110756513	XP_021813643.1	550	mitogen-activated protein kinase kinase kinase 3 isoform X2	10.75	2.37	5.16	9.1e-05	0.00858	1
11941	XM_021958042.1	LOC110756599	XP_021813734.1	491	UDP-glycosyltransferase 76F1-like	2.14	3.93	15.22	0.00094	0.04	1
11983	XM_021958112.1	LOC110756661	XP_021813804.1	483	ultraviolet-B receptor UVR8-like isoform X2	64.8	2.96	7.77	2.42e-16	9.22e-13	7.49e-12
11986	XM_021958113.1	LOC110756661	XP_021813805.1	407	ultraviolet-B receptor UVR8-like isoform X3	8.08	5.99	63.65	1.29e-08	6.5e-06	0.000399
12025	XM_021957992.1	LOC110756548	XP_021813684.1	38	LOW QUALITY PROTEIN: uncharacterized protein LOC110756548	1572.98	2.3	4.92	3.53e-05	0.00418	1
12153	XM_021958158.1	LOC110756703	XP_021813850.1	94	uncharacterized protein LOC110756703	577.56	-2.14	-4.41	1.59e-08	7.48e-06	0.000494
12178	XM_021958076.1	LOC110756636	XP_021813768.1	877	protein RDM16 isoform X1	26.15	1.24	2.36	0.00023	0.02	1
12181	XM_021958013.1	LOC110756575	XP_021813705.1	191	uncharacterized protein LOC110756575	25.64	-1.65	-3.14	0.000911	0.04	1
12278	XM_021958344.1	LOC110756868	XP_021814036.1	474	UDP-glycosyltransferase 74F2-like	34.65	1.74	3.35	0.000561	0.03	1
12296	XM_021958441.1	LOC110756942	XP_021814133.1	1542	probable phosphoinositide phosphatase SAC9 isoform X2	7.17	11.35	2607.45	3.82e-06	0.000778	0.12
12351	XM_021958354.1	LOC110756877	XP_021814046.1	529	probable WRKY transcription factor 32 isoform X2	14.71	2.27	4.81	0.000256	0.02	1
12409	XM_021958475.1	LOC110756966	XP_021814167.1	248	auxin-induced in root cultures protein 12-like	279.8	2.25	4.74	6.89e-06	0.00128	0.21
12420	XM_021958470.1	LOC110756962	XP_021814162.1	307	uncharacterized protein LOC110756962	92.63	-1.59	-3	0.000652	0.03	1
12428	XM_021958539.1	LOC110757025	XP_021814231.1	376	UV-B-induced protein At3g17800, chloroplastic	116.98	-2.33	-5.01	3.11e-09	2.25e-06	9.64e-05
12448	XM_021958486.1	LOC110756978	XP_021814178.1	535	cytochrome P450 82G1-like	22.89	2.49	5.62	7.71e-05	0.0076	1
12451	XM_021958491.1	LOC110756983	XP_021814183.1	539	cytochrome P450 82G1-like	29.99	1.99	3.97	0.000344	0.02	1
12499	XM_021958577.1	LOC110757057	XP_021814269.1	447	cytochrome P450 71A25-like	10.78	-3.73	-13.26	1.71e-08	7.74e-06	0.00053
12500	XM_021958579.1	LOC110757058	XP_021814271.1	556	(-)-alpha-pinene synthase-like isoform X2	172.1	-5.64	-49.94	7.59e-22	4.05e-18	2.35e-17
12501	XM_021958578.1	LOC110757058	XP_021814270.1	557	(-)-alpha-pinene synthase-like isoform X1	19.77	-5.36	-41.08	9.71e-13	1.52e-09	3.01e-08
12589	XM_021958734.1	LOC110757173	XP_021814426.1	355	WAT1-related protein At5g47470	282.93	1.18	2.26	0.000193	0.01	1
12617	XM_021958739.1	LOC110757178	XP_021814431.1	383	transcription factor HHO3-like	30.3	-1.46	-2.74	0.000746	0.03	1
12660	XM_021958730.1	LOC110757170	XP_021814422.1	385	ubiquitin receptor RAD23c-like	435.51	-1.17	-2.25	0.00109	0.04	1
12683	XM_021958787.1	LOC110757219	XP_021814479.1	369	uncharacterized protein LOC110757219	120.44	1.12	2.18	0.000399	0.02	1
12700	XM_021958839.1	LOC110757264	XP_021814531.1	1042	receptor-like protein kinase HAIKU2 isoform X1	90.13	1.64	3.11	1.54e-05	0.00231	0.48
12701	XM_021958840.1	LOC110757264	XP_021814532.1	968	receptor-like protein kinase HAIKU2 isoform X2	26.55	5.37	41.36	3.49e-09	2.41e-06	0.000108
12831	XM_021959004.1	LOC110757413	XP_021814696.1	1513	putative ABC transporter C family member 15	30.33	1.92	3.79	6.4e-06	0.00122	0.2
12866	XM_021958958.1	LOC110757367	XP_021814650.1	474	polygalacturonase inhibitor 1-like	114.17	1.31	2.48	0.000182	0.01	1
12957	XM_021959053.1	LOC110757455	XP_021814745.1	476	patellin-4-like	9.25	3.37	10.31	4.81e-08	2.04e-05	0.00149
12965	XM_021959027.1	LOC110757431	XP_021814719.1	214	protein LIGHT-DEPENDENT SHORT HYPOCOTYLS 4-like	164.9	1.65	3.14	0.000576	0.03	1
13041	XM_021959031.1	LOC110757435	XP_021814723.1	147	uncharacterized protein LOC110757435	88	1.47	2.76	0.000716	0.03	1
13067	XM_021959202.1	LOC110757550	XP_021814894.1	262	putative methyltransferase DDB_G0268948	102.44	4.82	28.2	1.09e-25	2.9e-21	3.36e-21
13082	XM_021959210.1	LOC110757558	XP_021814902.1	751	receptor-like protein 2	72.11	1.29	2.44	0.000213	0.02	1
13098	XM_021959231.1	LOC110757570	XP_021814923.1	939	probable leucine-rich repeat receptor-like serine/threonine-protein kinase At3g14840 isoform X6	27.17	-1.48	-2.78	0.000229	0.02	1
13115	XM_021959276.1	LOC110757608	XP_021814968.1	479	aspartyl protease family protein 2-like	468.83	2.07	4.21	1.03e-05	0.00172	0.32
13135	XM_021959337.1	LOC110757651	XP_021815029.1	245	uncharacterized protein At4g00950	30.08	-1.61	-3.06	0.000986	0.04	1
13140	XM_021959341.1	LOC110757653	XP_021815033.1	2397	uncharacterized protein LOC110757653 isoform X3	0.87	4.16	17.92	0.000476	0.03	1
13183	XM_021959316.1	LOC110757634	XP_021815008.1	482	AAA-ATPase At2g46620	17.19	1.72	3.3	0.000119	0.01	1
13196	XM_021959350.1	LOC110757660	XP_021815042.1	375	CDPK-related kinase 3 isoform X2	6.03	8.73	425	0.000611	0.03	1
13203	XM_021959347.1	LOC110757659	XP_021815039.1	447	CBL-interacting serine/threonine-protein kinase 9 isoform X1	45.28	-1.61	-3.05	0.00027	0.02	1
13204	XM_021959348.1	LOC110757659	XP_021815040.1	362	CBL-interacting serine/threonine-protein kinase 9 isoform X2	5.29	-3.17	-9	0.000266	0.02	1
13228	XM_021959386.1	LOC110757690	XP_021815078.1	1015	putative U-box domain-containing protein 42 isoform X2	3.09	-3.46	-11.04	2.44e-05	0.00315	0.76
13277	XM_021959481.1	LOC110757769	XP_021815173.1	357	S-adenosylmethionine decarboxylase proenzyme	177.72	1.26	2.4	0.00112	0.04	1
13307	XM_021959430.1	LOC110757730	XP_021815122.1	1026	phosphoenolpyruvate carboxylase 4 isoform X2	3.38	8.84	458.11	0.000673	0.03	1
13329	XM_021959497.1	LOC110757779	XP_021815189.1	687	trihelix transcription factor GTL1 isoform X2	8.91	3.58	11.93	0.000147	0.01	1
13506	XM_021959700.1	LOC110757950	XP_021815392.1	193	zinc finger protein CONSTANS-LIKE 4-like isoform X2	6.21	2.81	7.03	0.00128	0.05	1
13553	XM_021959717.1	LOC110757962	XP_021815409.1	568	protein TRANSPORT INHIBITOR RESPONSE 1-like	73.48	1.73	3.32	0.0003	0.02	1
13565	XM_021959759.1	LOC110757987	XP_021815451.1	588	vacuolar protein 8	7.95	-2.08	-4.22	0.000126	0.01	1
13566	XM_021959768.1	LOC110757995	XP_021815460.1	522	sugar carrier protein C	14.89	-2.61	-6.11	4.58e-09	3.06e-06	0.000142
13577	XM_021959806.1	LOC110758023	XP_021815498.1	660	probable LRR receptor-like serine/threonine-protein kinase At1g63430	40.88	-1.36	-2.57	3.76e-05	0.00435	1
13580	XM_021959783.1	LOC110758010	XP_021815475.1	522	oxalate--CoA ligase	674.33	1.46	2.76	0.000106	0.00967	1
13636	XM_021959857.1	LOC110758067	XP_021815549.1	139	calvin cycle protein CP12-3, chloroplastic	44	-2.2	-4.6	3.91e-06	0.000784	0.12
13729	XM_021959955.1	LOC110758152	XP_021815647.1	483	uncharacterized protein LOC110758152 isoform X2	3.05	5.1	34.41	0.000204	0.02	1
13747	XM_021959974.1	LOC110758170	XP_021815666.1	965	phosphoenolpyruvate carboxylase, housekeeping isozyme	40.78	1.16	2.23	0.000349	0.02	1
13748	XM_021959975.1	LOC110758170	XP_021815667.1	965	phosphoenolpyruvate carboxylase, housekeeping isozyme	42.19	1.16	2.23	0.000404	0.02	1
13777	XM_021960004.1	LOC110758196	XP_021815696.1	750	receptor-like protein 2	15.41	1.94	3.85	1.78e-05	0.00255	0.55
13804	XM_021960044.1	LOC110758241	XP_021815736.1	451	RHOMBOID-like protein 9, chloroplastic	9.42	-1.66	-3.17	0.000385	0.02	1
13848	XM_021960106.1	LOC110758282	XP_021815798.1	587	probable WRKY transcription factor 20 isoform X1	12.87	2.3	4.93	4.7e-05	0.00521	1
13857	XM_021960073.1	LOC110758265	XP_021815765.1	479	heterogeneous nuclear ribonucleoprotein 1-like isoform X1	32.54	-1.77	-3.41	0.000646	0.03	1
13929	XM_021960192.1	LOC110758357	XP_021815884.1	282	transcription factor TCP7-like	56.22	1.83	3.56	0.001	0.04	1
13965	XM_021960243.1	LOC110758384	XP_021815935.1	1080	calcium-transporting ATPase 10, plasma membrane-type-like	77.17	1.06	2.08	0.00104	0.04	1
13966	XM_021960244.1	LOC110758384	XP_021815936.1	1080	calcium-transporting ATPase 10, plasma membrane-type-like	76.26	1.09	2.13	0.000546	0.03	1
13967	XM_021960245.1	LOC110758384	XP_021815937.1	1080	calcium-transporting ATPase 10, plasma membrane-type-like	75.76	1.05	2.08	0.000936	0.04	1
14010	XM_021960194.1	LOC110758358	XP_021815886.1	820	subtilisin-like protease SBT2.5	23.58	-1.13	-2.19	0.00051	0.03	1
14011	XM_021960195.1	LOC110758358	XP_021815887.1	820	subtilisin-like protease SBT2.5	23.37	-1.22	-2.32	0.000167	0.01	1
14014	XM_021960151.1	LOC110758323	XP_021815843.1	385	oxysterol-binding protein-related protein 4B	18.71	1.69	3.22	7.62e-05	0.00753	1
14091	XM_021960367.1	LOC110758496	XP_021816059.1	357	cinnamyl alcohol dehydrogenase 1-like isoform X1	24.26	-1.54	-2.9	0.000528	0.03	1
14094	XM_021960369.1	LOC110758497	XP_021816061.1	357	probable cinnamyl alcohol dehydrogenase 1	69.95	-1.51	-2.85	2.19e-05	0.00293	0.68
14172	XM_021960453.1	LOC110758567	XP_021816145.1	604	4-coumarate--CoA ligase 2-like	43.89	2.63	6.17	0.000369	0.02	1
14264	XM_021960648.1	LOC110758731	XP_021816340.1	373	uncharacterized protein LOC110758731	31.88	2.58	5.97	0.000474	0.03	1
14310	XM_021960571.1	LOC110758660	XP_021816263.1	384	acyl-lipid omega-3 desaturase (cytochrome b5), endoplasmic reticulum-like	7.63	2.43	5.4	0.000444	0.02	1
14524	XM_021960934.1	LOC110758953	XP_021816626.1	759	oligopeptide transporter 7 isoform X1	18.99	1.91	3.75	1.84e-06	0.000431	0.06
14549	XM_021960862.1	LOC110758899	XP_021816554.1	459	methionine gamma-lyase	595.39	-2	-4.01	8.55e-06	0.00151	0.26
14551	XM_021960950.1	LOC110758967	XP_021816642.1	165	methionine gamma-lyase-like	21.24	-3.42	-10.7	2.14e-07	7.31e-05	0.00661
14579	XM_021960851.1	LOC110758891	XP_021816543.1	124	uncharacterized protein LOC110758891	68.01	1.76	3.38	0.000235	0.02	1
14659	XM_021960979.1	LOC110758990	XP_021816671.1	1962	mediator of RNA polymerase II transcription subunit 13 isoform X1	2.85	-2.1	-4.29	0.00106	0.04	1
14684	XM_021960971.1	LOC110758983	XP_021816663.1	305	uncharacterized protein LOC110758983	43.19	-1.24	-2.37	0.0011	0.04	1
14723	XM_021961062.1	LOC110759039	XP_021816754.1	1961	TATA-binding protein-associated factor BTAF1 isoform X2	1.38	9.36	657.82	0.000785	0.03	1
14843	XM_021961202.1	LOC110759166	XP_021816894.1	291	uncharacterized protein LOC110759166	15.67	5.15	35.41	0.000288	0.02	1
14879	XM_021961251.1	LOC110759214	XP_021816943.1	468	heparan-alpha-glucosaminide N-acetyltransferase isoform X2	16.56	-1.76	-3.39	5.38e-05	0.00574	1
15143	XM_021961488.1	LOC110759441	XP_021817180.1	1235	probable phospholipid-transporting ATPase 4 isoform X1	15.46	1.31	2.49	0.000256	0.02	1
15360	XM_021961782.1	LOC110759687	XP_021817474.1	343	transcription factor bHLH94-like	16.7	-1.94	-3.84	0.00107	0.04	1
15362	XM_021961785.1	LOC110759691	XP_021817477.1	218	glycine-rich RNA-binding protein RZ1A	51.28	1.42	2.68	0.000438	0.02	1
15379	XM_021961752.1	LOC110759666	XP_021817444.1	387	uncharacterized protein LOC110759666	41.99	-1.45	-2.73	0.000192	0.01	1
15465	XM_021961741.1	LOC110759653	XP_021817433.1	1642	protein MON2 homolog isoform X3	2.21	-3.8	-13.95	0.000276	0.02	1
15473	XM_021961702.1	LOC110759617	XP_021817394.1	209	uncharacterized protein LOC110759617	22.61	-1.8	-3.48	0.000237	0.02	1
15475	XM_021961805.1	LOC110759704	XP_021817497.1	433	probable transcription factor At3g04930	42.08	1.59	3.01	0.000765	0.03	1
15484	XM_021961828.1	LOC110759722	XP_021817520.1	735	probable serine/threonine-protein kinase WNK9 isoform X3	27.88	-1.42	-2.68	0.000288	0.02	1
15629	XM_021962011.1	LOC110759872	XP_021817703.1	1101	uncharacterized protein LOC110759872 isoform X2	4.49	10.18	1159.32	0.00042	0.02	1
15714	XM_021962173.1	LOC110760009	XP_021817865.1	128	lys-63-specific deubiquitinase BRCC36-like	16.09	3.06	8.36	0.000573	0.03	1
15747	XM_021962208.1	LOC110760033	XP_021817900.1	370	uncharacterized protein LOC110760033	76.16	2.19	4.55	0.000184	0.01	1
15994	XM_021962481.1	LOC110760244	XP_021818173.1	548	berberine bridge enzyme-like 15	7.17	-2.24	-4.72	0.000637	0.03	1
16043	XM_021962522.1	LOC110760279	XP_021818214.1	1164	protein GIGANTEA isoform X2	18.83	-1.18	-2.26	0.000259	0.02	1
16048	XM_021962523.1	LOC110760279	XP_021818215.1	1055	protein GIGANTEA isoform X3	2.03	8.49	359.68	0.000487	0.03	1
16066	XM_021962565.1	LOC110760315	XP_021818257.1	341	myb-related protein 330-like	19.42	-2.39	-5.23	1.84e-06	0.000431	0.06
16135	XM_021962599.1	LOC110760351	XP_021818291.1	486	CBS domain-containing protein CBSCBSPB1-like isoform X2	2.16	3.7	13.01	0.0012	0.05	1
16281	XM_021962826.1	LOC110760542	XP_021818518.1	199	photosystem II core complex proteins psbY, chloroplastic	118.6	-1.9	-3.73	5.96e-07	0.000171	0.02
16379	XM_021962892.1	LOC110760590	XP_021818584.1	150	auxin-responsive protein SAUR71-like	82.7	-3.27	-9.66	6.64e-09	4.22e-06	0.000205
16394	XM_021962968.1	LOC110760663	XP_021818660.1	303	putative glucose-6-phosphate 1-epimerase	87.22	1.56	2.95	6.77e-07	0.000186	0.02
16434	XM_021962953.1	LOC110760654	XP_021818645.1	310	ethylene-responsive transcription factor ERF061	236.11	-1.3	-2.47	0.000165	0.01	1
16574	XM_021963113.1	LOC110760791	XP_021818805.1	1451	pleiotropic drug resistance protein 2-like isoform X1	121.17	1.22	2.33	0.000464	0.03	1
16575	XM_021963114.1	LOC110760791	XP_021818806.1	1451	pleiotropic drug resistance protein 2-like isoform X2	123.79	1.26	2.4	0.000281	0.02	1
16593	XM_021963126.1	LOC110760801	XP_021818818.1	591	NAC domain-containing protein 53 isoform X1	10.38	1.61	3.06	0.000282	0.02	1
16726	XM_021963281.1	LOC110760927	XP_021818973.1	341	5-amino-6-(5-phospho-D-ribitylamino)uracil phosphatase, chloroplastic isoform X2	10.57	9.72	844.79	0.00103	0.04	1
16747	XM_021963304.1	LOC110760947	XP_021818996.1	251	30S ribosomal protein 2, chloroplastic	29.65	-1.5	-2.84	0.000202	0.02	1
16781	XM_021963342.1	LOC110760974	XP_021819034.1	1023	putative calcium-transporting ATPase 13, plasma membrane-type	8.36	2.41	5.33	0.000529	0.03	1
16782	XM_021963343.1	LOC110760976	XP_021819035.1	465	ATP sulfurylase 1, chloroplastic-like	897.06	2.4	5.27	3.93e-07	0.000119	0.01
16828	XM_021963360.1	LOC110760992	XP_021819052.1	647	probable mediator of RNA polymerase II transcription subunit 37e	2481.71	1.28	2.42	0.000116	0.01	1
16880	XM_021963444.1	LOC110761066	XP_021819136.1	1183	regulator of nonsense transcripts UPF2 isoform X1	4.93	3.84	14.34	3.83e-05	0.00438	1
16923	XM_021963514.1	LOC110761117	XP_021819206.1	352	probable BOI-related E3 ubiquitin-protein ligase 3	68.31	-1.48	-2.78	0.000109	0.00979	1
16936	XM_021963513.1	LOC110761116	XP_021819205.1	439	putative glycosyltransferase 7	21.65	1.55	2.93	0.000221	0.02	1
16943	XM_021963507.1	LOC110761114	XP_021819199.1	1007	BTB/POZ domain-containing protein At1g04390 isoform X3	3.25	6.18	72.75	3.28e-06	0.000683	0.1
16956	XM_021963527.1	LOC110761129	XP_021819219.1	1013	lon protease homolog 1, mitochondrial-like isoform X1	2.79	8.94	492.8	0.00058	0.03	1
16968	XM_021963678.1	LOC110761244	XP_021819370.1	566	uncharacterized protein LOC110761244	34.2	-2.79	-6.94	4.22e-14	8.67e-11	1.31e-09
16973	XM_021963695.1	LOC110761257	XP_021819387.1	284	protein MIZU-KUSSEI 1	120.12	-2.53	-5.79	2.4e-10	2.29e-07	7.43e-06
17163	XM_021963672.1	LOC110761239	XP_021819364.1	992	L-arabinokinase-like	19.34	-1.37	-2.59	0.000167	0.01	1
17164	XM_021963673.1	LOC110761239	XP_021819365.1	992	L-arabinokinase-like	20.01	-1.5	-2.83	2.86e-05	0.00352	0.89
17167	XM_021963648.1	LOC110761222	XP_021819340.1	220	gamma-glutamylcyclotransferase 2-1	279.97	1.51	2.86	0.000598	0.03	1
17300	XM_021963948.1	LOC110761468	XP_021819640.1	229	photosystem I reaction center subunit III, chloroplastic	131.91	-2.58	-5.97	3.57e-10	3.27e-07	1.11e-05
17525	XM_021964164.1	LOC110761633	XP_021819856.1	179	uncharacterized protein LOC110761633	76.62	-1.83	-3.56	5.98e-05	0.00623	1
17568	XM_021964266.1	LOC110761714	XP_021819958.1	3272	uncharacterized protein LOC110761714 isoform X2	1.21	9.83	908.6	0.000147	0.01	1
17588	XM_021964206.1	LOC110761664	XP_021819898.1	633	uncharacterized protein LOC110761664 isoform X4	11.93	10.79	1775.28	9.01e-05	0.00854	1
17618	XM_021964278.1	LOC110761726	XP_021819970.1	428	eukaryotic translation initiation factor 4B3	55.7	1.59	3.02	0.000476	0.03	1
17699	XM_021964397.1	LOC110761818	XP_021820089.1	384	probable indole-3-pyruvate monooxygenase YUCCA10	58.61	1.32	2.5	2.69e-05	0.00336	0.83
17706	XM_021964340.1	LOC110761779	XP_021820032.1	157	uncharacterized protein LOC110761779	51.12	2.14	4.41	0.000275	0.02	1
17714	XM_021964429.1	LOC110761848	XP_021820121.1	102	glutaredoxin-C11	95.46	-2.74	-6.68	0.000209	0.02	1
17737	XM_021964444.1	LOC110761860	XP_021820136.1	786	potassium transporter 5-like	215.64	1.52	2.88	2.9e-05	0.00355	0.9
17763	XM_021964462.1	LOC110761868	XP_021820154.1	191	translocator protein homolog	46.53	4.18	18.08	1.19e-10	1.18e-07	3.69e-06
17765	XM_021964341.1	LOC110761783	XP_021820033.1	237	stress-related protein	115.24	1.23	2.34	0.00108	0.04	1
17772	XM_021964422.1	LOC110761840	XP_021820114.1	833	DNA mismatch repair protein PMS1 isoform X2	1.82	6.96	124.93	5.24e-05	0.00562	1
17779	XM_021964372.1	LOC110761806	XP_021820064.1	1508	ABC transporter C family member 14-like isoform X1	26.97	1.68	3.19	2.39e-05	0.0031	0.74
17780	XM_021964373.1	LOC110761806	XP_021820065.1	1508	ABC transporter C family member 14-like isoform X1	26.67	1.66	3.17	1.57e-05	0.00235	0.48
17781	XM_021964374.1	LOC110761806	XP_021820066.1	1508	ABC transporter C family member 14-like isoform X1	26.09	1.71	3.26	1.36e-05	0.00212	0.42
17825	XM_021964521.1	LOC110761939	XP_021820213.1	90	uncharacterized protein LOC110761939	1279.71	2.14	4.41	1.08e-07	4.13e-05	0.00335
17826	XM_021964522.1	LOC110761940	XP_021820214.1	326	probable isoaspartyl peptidase/L-asparaginase 2	1722.64	1.79	3.46	0.000578	0.03	1
17839	XM_021964483.1	LOC110761894	XP_021820175.1	1037	kinesin-like protein KIN-4A isoform X3	5.86	-1.69	-3.23	0.00058	0.03	1
17867	XM_021964546.1	LOC110761961	XP_021820238.1	571	LOW QUALITY PROTEIN: uncharacterized protein LOC110761961	8.64	-1.83	-3.55	0.000713	0.03	1
17878	XM_021964471.1	LOC110761885	XP_021820163.1	248	uncharacterized protein LOC110761885 isoform X1	59.53	-1.64	-3.12	4.96e-05	0.00539	1
17944	XM_021964645.1	LOC110762051	XP_021820337.1	213	photosystem I reaction center subunit II, chloroplastic-like	188.53	-1.91	-3.76	1.66e-06	0.000398	0.05
17965	XM_021964703.1	LOC110762096	XP_021820395.1	438	protein UPSTREAM OF FLC	3.09	3.24	9.43	0.000706	0.03	1
17992	XM_021964666.1	LOC110762071	XP_021820358.1	253	THO complex subunit 4A isoform X1	11.29	-2.31	-4.95	0.00112	0.04	1
17997	XM_021964649.1	LOC110762056	XP_021820341.1	103	histone H4	113.12	-2.22	-4.66	1.39e-08	6.77e-06	0.000432
18130	XM_021964849.1	LOC110762244	XP_021820541.1	466	5'-adenylylsulfate reductase 3, chloroplastic-like	52.4	1.83	3.55	2.19e-05	0.00293	0.68
18141	XM_021964858.1	LOC110762251	XP_021820550.1	369	RNA polymerase II subunit 5-mediating protein homolog isoform X2	7.83	8.99	507.25	0.000457	0.03	1
18222	XM_021964943.1	LOC110762328	XP_021820635.1	255	chlorophyll a-b binding protein P4, chloroplastic	406.33	-1.37	-2.58	3.74e-05	0.00434	1
18224	XM_021964863.1	LOC110762258	XP_021820555.1	281	thioredoxin-like 1-2, chloroplastic	26.57	-2.95	-7.73	1.22e-08	6.34e-06	0.000378
18346	XM_021965083.1	LOC110762448	XP_021820775.1	850	putative SWI/SNF-related matrix-associated actin-dependent regulator of chromatin subfamily A member 3-like 1 isoform X2	7.03	6.45	87.68	5.94e-08	2.4e-05	0.00184
18372	XM_021965158.1	LOC110762510	XP_021820850.1	455	uncharacterized protein LOC110762510	44.98	1.19	2.28	0.000342	0.02	1
18382	XM_021965145.1	LOC110762495	XP_021820837.1	223	uncharacterized protein LOC110762495	42.12	-1.55	-2.92	0.000775	0.03	1
18424	XM_021965143.1	LOC110762494	XP_021820835.1	635	uncharacterized protein LOC110762494 isoform X3	6.45	5.07	33.67	1.8e-07	6.32e-05	0.00557
18457	XM_021965311.1	LOC110762648	XP_021821003.1	497	probable folate-biopterin transporter 2	22.21	1.23	2.35	0.000742	0.03	1
18464	XM_021965358.1	LOC110762685	XP_021821050.1	875	protein RRC1-like isoform X4	4.25	9.77	875.43	0.000252	0.02	1
18477	XM_021965247.1	LOC110762601	XP_021820939.1	1051	pentatricopeptide repeat-containing protein At4g31850, chloroplastic isoform X2	3.11	3.63	12.41	0.000705	0.03	1
18551	XM_021965330.1	LOC110762667	XP_021821022.1	535	cytochrome P450 CYP82D47-like	19.84	-2.11	-4.3	1.16e-05	0.00185	0.36
18561	XM_021965230.1	LOC110762586	XP_021820922.1	707	wall-associated receptor kinase-like 14	3.56	-2.37	-5.16	0.0011	0.04	1
18562	XM_021965255.1	LOC110762606	XP_021820947.1	522	allene oxide synthase 1, chloroplastic	72.41	2.32	5	5.17e-06	0.000999	0.16
18566	XM_021965294.1	LOC110762634	XP_021820986.1	301	uncharacterized protein LOC110762634 isoform X1	44.81	2.47	5.55	5.04e-05	0.00545	1
18729	XM_021965411.1	LOC110762734	XP_021821103.1	736	protein CHROMATIN REMODELING 19 isoform X1	66.61	1.19	2.27	0.000242	0.02	1
18738	XM_021965520.1	LOC110762826	XP_021821212.1	513	cytochrome P450 71A25-like	34.17	-3.05	-8.28	1.03e-10	1.06e-07	3.2e-06
18746	XM_021965529.1	LOC110762833	XP_021821221.1	694	tyrosine-sulfated glycopeptide receptor 1-like	10.05	2.53	5.78	2.05e-05	0.00283	0.63
18953	XM_021965684.1	LOC110762956	XP_021821376.1	349	F-box/kelch-repeat protein At2g44130-like	28.88	-2.2	-4.59	0.000123	0.01	1
18969	XM_021965884.1	LOC110763126	XP_021821576.1	543	L-ascorbate oxidase homolog	34.81	1.92	3.79	0.000417	0.02	1
18974	XM_021965812.1	LOC110763068	XP_021821504.1	472	5'-adenylylsulfate reductase 3, chloroplastic-like	210.24	2.64	6.23	1.63e-05	0.0024	0.5
19034	XM_021965860.1	LOC110763106	XP_021821552.1	394	glucose-6-phosphate/phosphate translocator 2, chloroplastic	537.92	2.39	5.25	2.46e-08	1.1e-05	0.000763
19049	XM_021965845.1	LOC110763093	XP_021821537.1	457	polyubiquitin	3827.58	1.14	2.2	0.000326	0.02	1
19105	XM_021965915.1	LOC110763157	XP_021821607.1	833	calcium-transporting ATPase 3, endoplasmic reticulum-type isoform X3	3.8	9.86	927.7	0.000139	0.01	1
19113	XM_021965938.1	LOC110763175	XP_021821630.1	206	uncharacterized protein LOC110763175	11.78	2.61	6.1	0.0004	0.02	1
19207	XM_021966058.1	LOC110763303	XP_021821750.1	310	zinc finger protein WIP3	76.62	-1.62	-3.08	3.27e-06	0.000683	0.1
19275	XM_021966104.1	LOC110763340	XP_021821796.1	70	18.1 kDa class I heat shock protein-like; frame=3	71.9	-3.21	-9.27	7.54e-06	0.00136	0.23
19348	XM_021966217.1	LOC110763429	XP_021821909.1	299	histone H1.2-like	268.64	-1.38	-2.61	0.000578	0.03	1
19376	XM_021966234.1	LOC110763446	XP_021821926.1	768	protein LONGIFOLIA 1	15.22	-6.3	-78.84	1.14e-09	8.68e-07	3.52e-05
19438	XM_021966301.1	LOC110763501	XP_021821993.1	931	probable leucine-rich repeat receptor-like serine/threonine-protein kinase At3g14840	19.94	-1.11	-2.16	0.000404	0.02	1
19442	XM_021966302.1	LOC110763503	XP_021821994.1	922	probable leucine-rich repeat receptor-like serine/threonine-protein kinase At3g14840	17.08	-1.53	-2.88	2.66e-05	0.00333	0.82
19465	XM_021966322.1	LOC110763530	XP_021822014.1	875	uncharacterized protein LOC110763530	10.09	2.16	4.46	0.000279	0.02	1
19522	XM_021966376.1	LOC110763567	XP_021822068.1	573	protein SIEVE ELEMENT OCCLUSION B-like	130.91	-1.83	-3.56	6.03e-07	0.000171	0.02
19616	XM_021966493.1	LOC110763662	XP_021822185.1	417	magnesium-protoporphyrin IX monomethyl ester oxidative; cyclase, chloroplastic isoform X1	291.7	-1.42	-2.67	8.69e-06	0.00153	0.27
19684	XM_021966539.1	LOC110763695	XP_021822231.1	473	serine carboxypeptidase-like 17 isoform X1	60.74	-1.9	-3.72	0.000309	0.02	1
19709	XM_021966620.1	LOC110763769	XP_021822312.1	344	DEAD-box ATP-dependent RNA helicase 56 isoform X2	12.25	9.95	988.95	0.000616	0.03	1
19752	XM_021966598.1	LOC110763753	XP_021822290.1	1700	uncharacterized protein LOC110763753 isoform X2	44.26	1	2.01	0.00108	0.04	1
19832	XM_021966728.1	LOC110763845	XP_021822420.1	353	WAT1-related protein At1g43650	44.43	-3.02	-8.14	7.32e-09	4.47e-06	0.000226
19897	XM_021966815.1	LOC110763916	XP_021822507.1	890	calmodulin-binding transcription activator 5 isoform X3	3.31	9.43	687.53	0.00129	0.05	1
19909	XM_021966819.1	LOC110763921	XP_021822511.1	487	shikimate O-hydroxycinnamoyltransferase-like	16.39	-2.07	-4.21	0.00124	0.05	1
19922	XM_021966833.1	LOC110763937	XP_021822525.1	383	(-)-alpha-pinene synthase-like	537.69	-1.4	-2.63	0.000274	0.02	1
19947	XM_021966876.1	LOC110763980	XP_021822568.1	582	probable serine/threonine-protein kinase DDB_G0280111 isoform X5	9.04	2.21	4.63	0.00061	0.03	1
19957	XM_021966861.1	LOC110763971	XP_021822553.1	868	linoleate 13S-lipoxygenase 2-1, chloroplastic-like	6.42	-2.66	-6.33	1.57e-05	0.00235	0.49
19990	XM_021966961.1	LOC110764052	XP_021822653.1	693	two-component response regulator-like APRR9 isoform X1	32.51	1.31	2.49	2.48e-05	0.00315	0.77
19991	XM_021966962.1	LOC110764052	XP_021822654.1	693	two-component response regulator-like APRR9 isoform X1	31.32	1.19	2.28	0.000131	0.01	1
19992	XM_021966964.1	LOC110764052	XP_021822656.1	615	two-component response regulator-like PRR95 isoform X3	25.32	1.54	2.9	2.53e-05	0.00319	0.78
20015	XM_021966973.1	LOC110764063	XP_021822665.1	769	protein LHY isoform X1	97.58	3.4	10.53	2.66e-25	3.56e-21	8.25e-21
20016	XM_021966974.1	LOC110764063	XP_021822666.1	769	protein LHY isoform X1	92.92	3.29	9.8	3.47e-23	3.09e-19	1.07e-18
20057	XM_021967057.1	LOC110764133	XP_021822749.1	450	zinc finger protein CONSTANS-LIKE 6-like	19.26	-5.32	-39.85	2.87e-18	1.28e-14	8.89e-14
20217	XM_021967163.1	LOC110764243	XP_021822855.1	358	glutamine synthetase nodule isozyme-like isoform X1	3.78	-3.65	-12.57	0.000416	0.02	1
20299	XM_021967277.1	LOC110764332	XP_021822969.1	356	WD repeat-containing protein LWD1	94.99	1.72	3.29	0.000477	0.03	1
20349	XM_021967315.1	LOC110764362	XP_021823007.1	429	uncharacterized protein LOC110764362	37.37	1.29	2.44	0.000586	0.03	1
20412	XM_021967375.1	LOC110764399	XP_021823067.1	443	ACT domain-containing protein ACR6	17.82	-1.36	-2.56	0.000975	0.04	1
20475	XM_021967454.1	LOC110764468	XP_021823146.1	579	2-hydroxyacyl-CoA lyase	96.97	1.07	2.1	0.00117	0.05	1
20600	XM_021967596.1	LOC110764596	XP_021823288.1	233	uncharacterized protein LOC110764596	14.88	3.58	11.94	0.000533	0.03	1
20633	XM_021967632.1	LOC110764623	XP_021823324.1	385.667	probable leucine-rich repeat receptor-like serine/threonine-protein kinase At3g14840	11.98	-2.02	-4.05	0.000235	0.02	1
20695	XM_021967783.1	LOC110764762	XP_021823475.1	277	expansin-B15-like	20.48	-3.82	-14.09	2.9e-06	0.00062	0.09
20761	XM_021967792.1	LOC110764770	XP_021823484.1	348	protein EXORDIUM-like 3	753.89	-1.27	-2.42	0.000551	0.03	1
20819	XM_021967825.1	LOC110764800	XP_021823517.1	124	dormancy-associated protein homolog 4 isoform X1	33.55	-2.78	-6.85	0.000202	0.02	1
20823	XM_021967823.1	LOC110764798	XP_021823515.1	220	dnaJ homolog subfamily B member 6-like isoform X2	55.11	1.54	2.91	0.000511	0.03	1
20871	XM_021967905.1	LOC110764863	XP_021823597.1	356	probable anion transporter 5 isoform X2	3.61	5.41	42.42	0.000423	0.02	1
20913	XM_021967936.1	LOC110764890	XP_021823628.1	142	light-regulated protein	264.32	-3.9	-14.89	1.79e-14	4.78e-11	5.54e-10
20948	XM_021967974.1	LOC110764925	XP_021823666.1	938	alpha-glucosidase-like isoform X1	1.02	9.45	701.73	0.000355	0.02	1
21092	XM_021968147.1	LOC110765095	XP_021823839.1	496	protein REVEILLE 1	12.28	3.37	10.37	7.92e-08	3.11e-05	0.00245
21112	XM_021968160.1	LOC110765104	XP_021823852.1	215	glutathione S-transferase F11-like	8.33	5.93	61.1	1.51e-06	0.000378	0.05
21220	XM_021968282.1	LOC110765207	XP_021823974.1	396	transcription termination factor MTERF6, chloroplastic/mitochondrial-like isoform X4	7.7	9.48	714.14	0.00121	0.05	1
21305	XM_021968382.1	LOC110765295	XP_021824074.1	252	aquaporin TIP1-1-like	2414.22	1.78	3.44	9.77e-06	0.00165	0.3
21306	XM_021968393.1	LOC110765305	XP_021824085.1	292	E3 ubiquitin-protein ligase RZFP34	47.23	-2.27	-4.81	9.17e-09	5.21e-06	0.000284
21321	XM_021968418.1	LOC110765324	XP_021824110.1	647	DEAD-box ATP-dependent RNA helicase 39	29.88	-1.07	-2.1	0.000517	0.03	1
21424	XM_021968613.1	LOC110765476	XP_021824305.1	184	E3 ubiquitin-protein ligase RHA2A-like	718.54	2.78	6.88	2.88e-06	0.00062	0.09
21431	XM_021968593.1	LOC110765458	XP_021824285.1	426	CDP-diacylglycerol--serine O-phosphatidyltransferase 1 isoform X2	7.42	9.53	739.95	0.00121	0.05	1
21439	XM_021968595.1	LOC110765460	XP_021824287.1	536	protein DETOXIFICATION 12-like	42.69	1.43	2.7	0.000297	0.02	1
21476	XM_021968509.1	LOC110765393	XP_021824201.1	146	heavy metal-associated isoprenylated plant protein 20	78.96	-1.31	-2.49	0.000584	0.03	1
21494	XM_021968535.1	LOC110765413	XP_021824227.1	159	extensin	72.8	2.26	4.78	0.000562	0.03	1
21517	XM_021968662.1	LOC110765521	XP_021824354.1	369	NAC domain-containing protein 40-like isoform X3	9.54	1.59	3.02	0.0013	0.05	1
21551	XM_021968649.1	LOC110765511	XP_021824341.1	499	probable pectate lyase 5	9.79	-1.8	-3.49	0.000325	0.02	1
21558	XM_021968632.1	LOC110765500	XP_021824324.1	707	uncharacterized protein ycf45	27.08	1.16	2.23	0.00103	0.04	1
21561	XM_021968683.1	LOC110765546	XP_021824375.1	391	3-hydroxyisobutyryl-CoA hydrolase 1-like	15.64	1.94	3.84	0.000241	0.02	1
21580	XM_021968693.1	LOC110765556	XP_021824385.1	433	arogenate dehydratase/prephenate dehydratase 6, chloroplastic-like	145.48	2.28	4.85	2.14e-05	0.0029	0.66
21620	XM_021968732.1	LOC110765589	XP_021824424.1	86	classical arabinogalactan protein 1-like	76.39	2.71	6.54	0.000148	0.01	1
21675	XM_021968991.1	LOC110765764	XP_021824683.1	947	probable LRR receptor-like serine/threonine-protein kinase At4g36180 isoform X1	24.49	1.51	2.86	0.000385	0.02	1
21724	XM_021969010.1	LOC110765780	XP_021824702.1	389	60S ribosomal protein L3-2	13.82	2.23	4.7	1.53e-05	0.00231	0.48
21740	XM_021968793.1	LOC110765626	XP_021824485.1	512	cytochrome P450 98A2-like isoform X2	43.5	3.15	8.89	0.000196	0.01	1
21743	XM_021968795.1	LOC110765628	XP_021824487.1	508	cytochrome P450 98A2-like	223.6	1.56	2.94	2.26e-06	0.000511	0.07
21836	XM_021968799.1	LOC110765632	XP_021824491.1	617	protein NRT1/ PTR FAMILY 4.3-like	8.87	-3.58	-11.96	0.000106	0.00966	1
21880	XM_021968782.1	LOC110765619	XP_021824474.1	734	ferric reduction oxidase 7, chloroplastic-like	24.42	-1.68	-3.2	1.89e-06	0.000439	0.06
21923	XM_021969072.1	LOC110765833	XP_021824764.1	457	uncharacterized protein LOC110765833 isoform X2	13.11	-2.41	-5.32	4.04e-05	0.00461	1
21948	XM_021969123.1	LOC110765879	XP_021824815.1	455	amino acid transporter AVT6C-like isoform X3	29.28	-2.06	-4.16	7.76e-07	0.000205	0.02
21949	XM_021969121.1	LOC110765879	XP_021824813.1	402	amino acid transporter AVT6D-like isoform X1	9.26	-2.31	-4.95	0.000143	0.01	1
21950	XM_021969122.1	LOC110765879	XP_021824814.1	395	amino acid transporter AVT6D-like isoform X2	9.98	-2.13	-4.36	0.000509	0.03	1
21952	XM_021969124.1	LOC110765880	XP_021824816.1	322	amino acid transporter AVT6C-like isoform X1	21.93	-1.94	-3.84	0.000155	0.01	1
21953	XM_021969117.1	LOC110765874	XP_021824809.1	209	uncharacterized protein LOC110765874	60.27	-1.46	-2.75	0.000651	0.03	1
21962	XM_021969100.1	LOC110765858	XP_021824792.1	589	protein NRT1/ PTR FAMILY 5.1	23.11	-2.3	-4.94	0.000328	0.02	1
21981	XM_021969097.1	LOC110765854	XP_021824789.1	292	UDP-xylose transporter 2-like isoform X2	3.98	6.27	77.24	0.000273	0.02	1
21998	XM_021969177.1	LOC110765932	XP_021824869.1	503	protein DETOXIFICATION 41-like	88.21	1.31	2.48	7.41e-05	0.00735	1
22005	XM_021969203.1	LOC110765953	XP_021824895.1	364	uncharacterized oxidoreductase At1g06690, chloroplastic	59.29	1.47	2.76	0.000106	0.00966	1
22008	XM_021969161.1	LOC110765918	XP_021824853.1	264	oxygen-evolving enhancer protein 2, chloroplastic	559.31	-2.21	-4.64	3.67e-10	3.27e-07	1.14e-05
22016	XM_021969171.1	LOC110765927	XP_021824863.1	397	phytoene synthase 2, chloroplastic-like	61.54	1.29	2.44	0.000128	0.01	1
22042	XM_021969204.1	LOC110765956	XP_021824896.1	170	2-carboxy-1,4-naphthoquinone phytyltransferase, chloroplastic-like	18.32	-2.11	-4.31	0.000328	0.02	1
22063	XM_021969230.1	LOC110765978	XP_021824922.1	126	uncharacterized protein LOC110765978	117.56	-1.37	-2.59	0.000175	0.01	1
22190	XM_021969372.1	LOC110766109	XP_021825064.1	362	serine/threonine-protein kinase SRK2I	113.42	-1.31	-2.47	0.000138	0.01	1
22203	XM_021969368.1	LOC110766104	XP_021825060.1	387	patatin-like protein 3	14.1	2.18	4.54	0.00115	0.05	1
22230	XM_021969430.1	LOC110766153	XP_021825122.1	322	dnaJ homolog subfamily C member 2	23.84	1.37	2.58	0.000819	0.04	1
22270	XM_021969491.1	LOC110766207	XP_021825183.1	431	galacturonokinase isoform X1	12.95	-1.75	-3.36	0.000963	0.04	1
22309	XM_021969502.1	LOC110766214	XP_021825194.1	1981	E3 ubiquitin-protein ligase PRT6 isoform X2	5.67	7.53	185.31	1.89e-11	2.19e-08	5.84e-07
22378	XM_021969581.1	LOC110766284	XP_021825273.1	292	histone chaperone RTT106-like isoform X2	16.51	10.15	1133.11	0.000434	0.02	1
22430	XM_021969627.1	LOC110766324	XP_021825319.1	904	E3 ubiquitin-protein ligase HOS1 isoform X2	6.39	4.34	20.28	3.44e-05	0.00409	1
22494	XM_021969702.1	LOC110766383	XP_021825394.1	859	probable alpha,alpha-trehalose-phosphate synthase UDP-forming; 9	29.07	-3.72	-13.15	7.47e-09	4.47e-06	0.000231
22515	XM_021969769.1	LOC110766437	XP_021825461.1	231	BTB/POZ domain-containing protein At4g08455-like	111.39	1.44	2.72	0.000975	0.04	1
22751	XM_021969938.1	LOC110766584	XP_021825630.1	264	chlorophyll a-b binding protein of LHCII type 1	43.74	-2.09	-4.25	9.61e-06	0.00165	0.3
22812	XM_021970059.1	LOC110766694	XP_021825751.1	314	annexin D4-like	7.03	-3.66	-12.63	6.89e-06	0.00128	0.21
22846	XM_021970139.1	LOC110766775	XP_021825831.1	340	clathrin light chain 1-like	153.82	1.21	2.31	0.000416	0.02	1
22854	XM_021970132.1	LOC110766769	XP_021825824.1	255	stem-specific protein TSJT1-like	81.53	-2.35	-5.08	2.24e-07	7.58e-05	0.00695
22902	XM_021970150.1	LOC110766779	XP_021825842.1	892	probable ubiquitin-conjugating enzyme E2 24 isoform X2	3.09	9.1	549.74	0.000334	0.02	1
22907	XM_021970162.1	LOC110766786	XP_021825854.1	898	linoleate 13S-lipoxygenase 3-1, chloroplastic-like isoform X2	1.28	8.08	271.24	4.86e-05	0.00531	1
22911	XM_021970205.1	LOC110766817	XP_021825897.1	293	uncharacterized protein LOC110766817	28.73	-4.38	-20.89	3.52e-09	2.41e-06	0.000109
22945	XM_021970214.1	LOC110766821	XP_021825906.1	762	histone acetyltransferase KAT6B-like isoform X2	273.05	-1.23	-2.34	0.000224	0.02	1
22955	XM_021970219.1	LOC110766826	XP_021825911.1	295	uncharacterized protein LOC110766826 isoform X1	5.23	4.83	28.45	9.29e-05	0.00873	1
23073	XM_021970351.1	LOC110766929	XP_021826043.1	1030	uncharacterized protein LOC110766929 isoform X3	3.46	4.51	22.81	5.06e-06	0.000985	0.16
23086	XM_021970327.1	LOC110766914	XP_021826019.1	1093	uncharacterized protein LOC110766914 isoform X1	4.87	-1.8	-3.49	0.000254	0.02	1
23087	XM_021970328.1	LOC110766914	XP_021826020.1	1093	uncharacterized protein LOC110766914 isoform X1	4.62	-1.6	-3.03	0.00129	0.05	1
23128	XM_021970405.1	LOC110766979	XP_021826097.1	290	uncharacterized protein LOC110766979	134.14	-2.25	-4.75	1.83e-09	1.35e-06	5.66e-05
23163	XM_021970439.1	LOC110767019	XP_021826131.1	193	uncharacterized protein LOC110767019	73.94	2.2	4.61	0.000941	0.04	1
23339	XM_021970595.1	LOC110767143	XP_021826287.1	350	probable WRKY transcription factor 53	12.62	4.2	18.42	5.49e-05	0.0058	1
23429	XM_021970798.1	LOC110767294	XP_021826490.1	873	importin subunit beta-1-like	51.03	1.27	2.4	0.0001	0.00927	1
23430	XM_021970799.1	LOC110767294	XP_021826491.1	873	importin subunit beta-1-like	52.78	1.23	2.35	0.000127	0.01	1
23453	XM_021970775.1	LOC110767276	XP_021826467.1	552	protein DETOXIFICATION 44, chloroplastic isoform X2	6.38	5	31.9	0.000355	0.02	1
23458	XM_021970806.1	LOC110767301	XP_021826498.1	226	PRA1 family protein B4-like	77.52	2.18	4.55	0.000178	0.01	1
23500	XM_021970804.1	LOC110767299	XP_021826496.1	779	uncharacterized protein LOC110767299	62.01	-1.27	-2.42	0.00029	0.02	1
23564	XM_021970904.1	LOC110767377	XP_021826596.1	319	36.4 kDa proline-rich protein-like	199.41	2.14	4.4	0.000165	0.01	1
23616	XM_021970943.1	LOC110767410	XP_021826635.1	512	ABC transporter E family member 2 isoform X2	4.73	6.04	65.97	0.000315	0.02	1
23659	XM_021970992.1	LOC110767448	XP_021826684.1	632	E3 ubiquitin-protein ligase KEG-like	76.42	-1.51	-2.85	1.38e-05	0.00214	0.43
23688	XM_021971038.1	LOC110767486	XP_021826730.1	704	ABC transporter G family member 11-like	424.6	3.11	8.63	8.22e-15	2.44e-11	2.54e-10
23725	XM_021971085.1	LOC110767520	XP_021826777.1	736	uncharacterized protein At4g26450 isoform X2	20.28	2.7	6.49	1.32e-06	0.000336	0.04
23737	XM_021971126.1	LOC110767550	XP_021826818.1	164	photosystem I reaction center subunit V, chloroplastic	63.93	-1.47	-2.77	0.000297	0.02	1
23772	XM_021971132.1	LOC110767554	XP_021826824.1	480	zeatin O-glucosyltransferase-like	115.5	-1.83	-3.56	7.86e-05	0.0077	1
23773	XM_021971136.1	LOC110767559	XP_021826828.1	356	uncharacterized protein LOC110767559	18.94	1.77	3.41	1.65e-05	0.00241	0.51
23785	XM_021971345.1	LOC110767715	XP_021827037.1	483	xyloglucan galactosyltransferase XLT2	116.22	1.64	3.12	0.000263	0.02	1
23825	XM_021971329.1	LOC110767705	XP_021827021.1	381	transcription factor TCP19	3.99	-3.22	-9.29	0.000158	0.01	1
23909	XM_021971244.1	LOC110767647	XP_021826936.1	620	low-temperature-induced 65 kDa protein-like isoform X4	156.79	3.12	8.7	4.22e-14	8.67e-11	1.31e-09
23911	XM_021971241.1	LOC110767647	XP_021826933.1	728	low-temperature-induced 65 kDa protein-like isoform X1	350.62	2.85	7.2	8.36e-12	1.06e-08	2.59e-07
23912	XM_021971243.1	LOC110767647	XP_021826935.1	620	low-temperature-induced 65 kDa protein-like isoform X3	153.18	3.2	9.18	7.3e-13	1.22e-09	2.26e-08
23970	XM_021971309.1	LOC110767690	XP_021827001.1	285	LOW QUALITY PROTEIN: protein SRC2	111.93	1.71	3.27	8.3e-06	0.00148	0.26
23971	XM_021971305.1	LOC110767688	XP_021826997.1	490	protein DETOXIFICATION 35-like	166.2	2.33	5.02	4.73e-10	4.07e-07	1.47e-05
23973	XM_021971231.1	LOC110767638	XP_021826923.1	490	protein DETOXIFICATION 35-like isoform X2	78.34	1.11	2.16	0.000742	0.03	1
23979	XM_021971203.1	LOC110767619	XP_021826895.1	644	scarecrow-like protein 8	43.32	1.46	2.75	0.000447	0.02	1
24060	XM_021971176.1	LOC110767592	XP_021826868.1	1478	ABC transporter C family member 10-like	45.88	2.01	4.04	1.64e-06	0.000398	0.05
24071	XM_021971462.1	LOC110767810	XP_021827154.1	841	beta-galactosidase 1-like	12.05	-2.29	-4.88	6.27e-07	0.000174	0.02
24194	XM_021971637.1	LOC110767960	XP_021827329.1	1126	DNA repair protein REV1 isoform X4	2.67	-5.79	-55.15	8.13e-05	0.00783	1
24347	XM_021971762.1	LOC110768075	XP_021827454.1	487	UDP-glycosyltransferase 86A1-like	12.4	-2.12	-4.33	3.27e-05	0.00391	1
24348	XM_021971761.1	LOC110768074	XP_021827453.1	544	UDP-glycosyltransferase 86A1-like	12.92	-2.26	-4.78	6.04e-07	0.000171	0.02
24421	XM_021971843.1	LOC110768161	XP_021827535.1	1293	Niemann-Pick C1 protein-like	61.45	1.31	2.48	1.82e-05	0.0026	0.56
24518	XM_021971985.1	LOC110768281	XP_021827677.1	1334	formin-like protein 14 isoform X2	2.74	3.13	8.77	0.000579	0.03	1
24528	XM_021971970.1	LOC110768269	XP_021827662.1	528	probable polyamine transporter At1g31830 isoform X1	3.72	-2.58	-5.96	0.00108	0.04	1
24659	XM_021972138.1	LOC110768407	XP_021827830.1	264	STOREKEEPER protein-like	151.14	1.52	2.87	0.00103	0.04	1
24673	XM_021972140.1	LOC110768409	XP_021827832.1	442	transcription repressor OFP2-like	27.17	-1.46	-2.75	0.00102	0.04	1
24682	XM_021972162.1	LOC110768434	XP_021827854.1	605	pyruvate decarboxylase 2	677.54	1.13	2.19	0.000689	0.03	1
24717	XM_021972192.1	LOC110768460	XP_021827884.1	217	uncharacterized protein LOC110768460 isoform X2	13.52	9.43	687.53	0.00128	0.05	1
24858	XM_021972342.1	LOC110768569	XP_021828034.1	236	uncharacterized protein LOC110768569	52.43	2.16	4.48	0.000555	0.03	1
24872	XM_021972341.1	LOC110768568	XP_021828033.1	269	protein TORNADO 2	37.69	-1.93	-3.81	1.39e-05	0.00215	0.43
24961	XM_021972422.1	LOC110768617	XP_021828114.1	513	protease Do-like 10, mitochondrial isoform X2	2.27	-4.81	-28.06	0.000782	0.03	1
25021	XM_021972517.1	LOC110768685	XP_021828209.1	637	protein NRT1/ PTR FAMILY 6.1	9.23	1.44	2.71	0.000886	0.04	1
25103	XM_021972620.1	LOC110768771	XP_021828312.1	232	oxygen-evolving enhancer protein 3, chloroplastic-like	227.81	-2.19	-4.57	1.14e-09	8.68e-07	3.52e-05
25201	XM_021972711.1	LOC110768846	XP_021828403.1	309	protein ORANGE-GREEN, chloroplastic isoform X1	16.34	-1.58	-2.98	0.0012	0.05	1
25213	XM_021972741.1	LOC110768877	XP_021828433.1	305	protein FLUORESCENT IN BLUE LIGHT, chloroplastic isoform X1	9.07	-2.61	-6.09	8.64e-05	0.0083	1
25298	XM_021972802.1	LOC110768925	XP_021828494.1	1418	E3 ubiquitin-protein ligase SHPRH isoform X2	1.67	-2.97	-7.83	0.000357	0.02	1
25299	XM_021972803.1	LOC110768925	XP_021828495.1	1349	E3 ubiquitin-protein ligase SHPRH isoform X3	0.59	5.07	33.6	0.00125	0.05	1
25387	XM_021972912.1	LOC110769012	XP_021828604.1	619	probable serine/threonine-protein kinase WNK5	20.76	-2.51	-5.7	0.000156	0.01	1
25433	XM_021972990.1	LOC110769086	XP_021828682.1	365	transcription factor bHLH128	75.19	1.22	2.33	0.000986	0.04	1
25486	XM_021973052.1	LOC110769135	XP_021828744.1	508	putative BPI/LBP family protein At1g04970 isoform X2	6.21	-2.06	-4.16	0.00114	0.05	1
25546	XM_021973108.1	LOC110769177	XP_021828800.1	695	protein RRP6-like 2 isoform X2	4.95	9.65	805.48	0.00109	0.04	1
25652	XM_021973232.1	LOC110769286	XP_021828924.1	496	uncharacterized protein LOC110769286 isoform X2	7.78	3.14	8.79	0.000163	0.01	1
25709	XM_021973297.1	LOC110769347	XP_021828989.1	286	TLD domain-containing protein 2 isoform X2	4.89	4.33	20.14	0.00124	0.05	1
25714	XM_021973295.1	LOC110769346	XP_021828987.1	300	cysteine-rich repeat secretory protein 3-like	36.55	1.41	2.66	0.000767	0.03	1
25824	XM_021973500.1	LOC110769511	XP_021829192.1	738	centromere protein C isoform X5	1	5.06	33.26	0.000795	0.04	1
25828	XM_021973472.1	LOC110769488	XP_021829164.1	605	uncharacterized protein LOC110769488 isoform X2	2.09	8.98	503.52	0.000738	0.03	1
25885	XM_021973438.1	LOC110769456	XP_021829130.1	100	dynein light chain 1, cytoplasmic	53.4	-1.83	-3.55	0.000317	0.02	1
25891	XM_021973494.1	LOC110769508	XP_021829186.1	144	photosystem I reaction center subunit VI, chloroplastic-like	205.24	-1.31	-2.47	6.91e-05	0.00701	1
25997	XM_021973623.1	LOC110769605	XP_021829315.1	678	protein LYK5	45.37	2.11	4.31	1.67e-05	0.00242	0.52
26159	XM_021973806.1	LOC110769771	XP_021829498.1	427	phospholipase A(1) LCAT3 isoform X2	8.74	8.62	394.67	0.00106	0.04	1
26214	XM_021973861.1	LOC110769821	XP_021829553.1	950	uncharacterized protein LOC110769821	11.85	-1.54	-2.92	4.57e-05	0.00511	1
26224	XM_021973879.1	LOC110769839	XP_021829571.1	367	uncharacterized protein LOC110769839	190.17	1.62	3.08	0.000301	0.02	1
26384	XM_021974056.1	LOC110769986	XP_021829748.1	470	UDP-glycosyltransferase 84B2-like	32.95	-1.28	-2.42	0.000911	0.04	1
26503	XM_021974177.1	LOC110770089	XP_021829869.1	179	protein PLASTID REDOX INSENSITIVE 2-like	55.35	-1.73	-3.33	6.93e-05	0.00701	1
26537	XM_021974217.1	LOC110770132	XP_021829909.1	531	beta-glucosidase 12-like isoform X4	5.41	-2.65	-6.3	0.000148	0.01	1
26580	XM_021974274.1	LOC110770187	XP_021829966.1	240	B-box zinc finger protein 21-like	64.34	2.44	5.43	7.21e-06	0.00133	0.22
26805	XM_021974538.1	LOC110770400	XP_021830230.1	287	protein E6-like	76.6	-1.51	-2.85	0.00102	0.04	1
26916	XM_021974648.1	LOC110770503	XP_021830340.1	286	chlorophyll a-b binding protein CP29.1, chloroplastic	589.48	-1.25	-2.38	0.000139	0.01	1
26943	XM_021974679.1	LOC110770530	XP_021830371.1	312	protein MARD1-like	135.87	-1.18	-2.26	0.00051	0.03	1
27123	XM_021974876.1	LOC110770677	XP_021830568.1	294	protein SULFUR DEFICIENCY-INDUCED 1 isoform X1	30.37	2.31	4.95	0.000122	0.01	1
27142	XM_021974921.1	LOC110770716	XP_021830613.1	614	BTB/POZ domain-containing protein At5g48800	14.24	-2.72	-6.58	1.02e-08	5.59e-06	0.000316
27168	XM_021974904.1	LOC110770699	XP_021830596.1	101	small ubiquitin-related modifier 1-like	113.6	-2.16	-4.47	1.26e-07	4.67e-05	0.0039
27190	XM_021974943.1	LOC110770740	XP_021830635.1	382	delta(12)-fatty-acid desaturase FAD2 isoform X2	183.94	1.14	2.21	0.000402	0.02	1
27453	XM_021975250.1	LOC110771018	XP_021830942.1	830	potassium channel SKOR	15.03	1.28	2.44	0.000981	0.04	1
27454	XM_021975253.1	LOC110771018	XP_021830945.1	830	potassium channel SKOR	14.96	1.32	2.5	0.000807	0.04	1
27506	XM_021975298.1	LOC110771065	XP_021830990.1	415	uncharacterized protein LOC110771065	7.52	2.4	5.28	0.000712	0.03	1
27623	XM_021975425.1	LOC110771166	XP_021831117.1	786	cyclic nucleotide-gated ion channel 1-like	21.36	-1.13	-2.19	0.000451	0.02	1
27666	XM_021975479.1	LOC110771219	XP_021831171.1	529	regulator of nonsense transcripts UPF3 isoform X1	5.53	5.71	52.19	2.01e-05	0.00279	0.62
27697	XM_021975527.1	LOC110771260	XP_021831219.1	155	chaperone protein dnaJ 11, chloroplastic-like	168.53	-1.37	-2.58	0.000582	0.03	1
27702	XM_021975513.1	LOC110771249	XP_021831205.1	111	uncharacterized protein LOC110771249	35.51	-2.25	-4.77	0.000341	0.02	1
27724	XM_021975551.1	LOC110771280	XP_021831243.1	420	methylthioribose kinase-like	34.12	1.94	3.84	4.3e-06	0.000857	0.13
27733	XM_021975545.1	LOC110771274	XP_021831237.1	2272	dnaJ homolog subfamily C GRV2 isoform X2	4.28	-1.86	-3.64	0.000211	0.02	1
27766	XM_021975595.1	LOC110771316	XP_021831287.1	578	70 kDa peptidyl-prolyl isomerase-like	28.29	-1.99	-3.98	7.46e-06	0.00135	0.23
27774	XM_021975621.1	LOC110771334	XP_021831313.1	1536	ABC transporter C family member 5	109.48	1.09	2.12	0.000699	0.03	1
27790	XM_021975604.1	LOC110771322	XP_021831296.1	376	uncharacterized protein LOC110771322	11.79	1.73	3.31	0.00127	0.05	1
27846	XM_021975687.1	LOC110771389	XP_021831379.1	1061	calcium-transporting ATPase 1, endoplasmic reticulum-type-like	37.26	1.12	2.18	0.00131	0.05	1
27873	XM_021975698.1	LOC110771399	XP_021831390.1	1109	pleiotropic drug resistance protein 1-like isoform X2	27.24	1.63	3.09	7.36e-05	0.00735	1
28008	XM_021975853.1	LOC110771536	XP_021831545.1	276	cytochrome P450 98A2-like	125.61	1.68	3.21	1.67e-07	5.93e-05	0.00516
28084	XM_021975946.1	LOC110771616	XP_021831638.1	499	cytochrome P450 81E8-like	17.06	-1.86	-3.62	8.92e-05	0.00854	1
28139	XM_021976024.1	LOC110771680	XP_021831716.1	189	uncharacterized protein LOC110771680	367.83	-1.42	-2.67	6.19e-05	0.0064	1
28206	XM_021976106.1	LOC110771754	XP_021831798.1	735	cellulose synthase-like protein G3	74.66	1.64	3.12	2.84e-06	0.00062	0.09
28235	XM_021976117.1	LOC110771769	XP_021831809.1	704	receptor-like protein 2	6.52	2.13	4.38	0.000644	0.03	1
28239	XM_021976121.1	LOC110771773	XP_021831813.1	153	UBP1-associated protein 2C-like	149.08	1.99	3.98	0.000817	0.04	1
28255	XM_021976135.1	LOC110771783	XP_021831827.1	580	sodium/calcium exchanger NCL-like	401.68	1.3	2.46	0.000129	0.01	1
28346	XM_021976232.1	LOC110771871	XP_021831924.1	399	probable DNA-3-methyladenine glycosylase 2 isoform X1	25.32	3.19	9.15	3.68e-07	0.000113	0.01
28360	XM_021976251.1	LOC110771888	XP_021831943.1	758	scarecrow-like protein 22 isoform X2	11.34	10.98	2022.48	5.42e-05	0.00577	1
28463	XM_021976306.1	LOC110771955	XP_021831998.1	942	probable LRR receptor-like serine/threonine-protein kinase At1g06840	3.34	-2.8	-6.94	9.86e-06	0.00165	0.31
28471	XM_021976376.1	LOC110772014	XP_021832068.1	225	two-component response regulator ORR9-like	44.81	-1.63	-3.1	0.000133	0.01	1
28473	XM_021976373.1	LOC110772010	XP_021832065.1	171	protein CURVATURE THYLAKOID 1B, chloroplastic-like	51.54	-1.84	-3.58	0.000642	0.03	1
28552	XM_021976443.1	LOC110772067	XP_021832135.1	507	uncharacterized protein LOC110772067	144.67	1.42	2.67	0.000371	0.02	1
28688	XM_021976667.1	LOC110772241	XP_021832359.1	323	uncharacterized protein LOC110772241	152.61	-1.21	-2.31	0.000269	0.02	1
28689	XM_021976622.1	LOC110772203	XP_021832314.1	160	LOW QUALITY PROTEIN: photosystem II repair protein PSB27-H1, chloroplastic	86.64	-2.31	-4.97	3.32e-07	0.000103	0.01
28769	XM_021976748.1	LOC110772310	XP_021832440.1	342	calcium uniporter protein 4, mitochondrial	5.02	4.03	16.36	0.000628	0.03	1
28826	XM_021976775.1	LOC110772342	XP_021832467.1	1086	uncharacterized protein LOC110772342 isoform X1	0.83	5.08	33.85	0.000462	0.03	1
28836	XM_021976791.1	LOC110772356	XP_021832483.1	408	L-2-hydroxyglutarate dehydrogenase, mitochondrial isoform X2	7.42	9.04	526.75	0.000583	0.03	1
28845	XM_021976797.1	LOC110772360	XP_021832489.1	169	auxin-responsive protein IAA9-like	41.54	10.69	1657.33	0.000119	0.01	1
28866	XM_021976821.1	LOC110772384	XP_021832513.1	419	protein LNK3	108.88	2.54	5.84	3.25e-14	7.88e-11	1.01e-09
28918	XM_021976873.1	LOC110772436	XP_021832565.1	375	tRNase Z TRZ2, chloroplastic isoform X1	6.18	-2.73	-6.65	0.000707	0.03	1
29026	XM_021977013.1	LOC110772574	XP_021832705.1	3086	BEACH domain-containing protein B isoform X2	3.24	11.2	2351.93	2.08e-05	0.00285	0.65
29027	XM_021977014.1	LOC110772574	XP_021832706.1	2941	BEACH domain-containing protein B isoform X3	3.72	11.33	2574.79	1.62e-05	0.0024	0.5
29032	XM_021977029.1	LOC110772585	XP_021832721.1	218	uncharacterized protein LOC110772585	162.66	1.73	3.32	0.000174	0.01	1
29048	XM_021977022.1	LOC110772580	XP_021832714.1	213	uncharacterized protein LOC110772580 isoform X1	62.9	1.39	2.61	0.000218	0.02	1
29111	XM_021977079.1	LOC110772625	XP_021832771.1	247	chlorophyll a-b binding protein 6, chloroplastic	318.88	-1.22	-2.33	0.000256	0.02	1
29128	XM_021977142.1	LOC110772691	XP_021832834.1	377	pre-mRNA-splicing factor 38-like isoform X2	9.04	4	16	0.000887	0.04	1
29130	XM_021977141.1	LOC110772691	XP_021832833.1	377	pre-mRNA-splicing factor 38-like isoform X1	16.71	-2.1	-4.28	0.0001	0.00927	1
29134	XM_021977127.1	LOC110772674	XP_021832819.1	457	vinorine synthase-like	3.01	-4.13	-17.55	0.000246	0.02	1
29162	XM_021977159.1	LOC110772703	XP_021832851.1	243	F-box protein SKIP24 isoform X3	9.32	-5.29	-39.09	1.83e-05	0.0026	0.57
29172	XM_021977166.1	LOC110772708	XP_021832858.1	201	early light-induced protein 1, chloroplastic-like	53.66	3.12	8.71	2.72e-06	0.000599	0.08
29174	XM_021977168.1	LOC110772710	XP_021832860.1	189	early light-induced protein 1, chloroplastic-like	7.66	6.81	112.38	1.06e-05	0.00174	0.33
29175	XM_021977162.1	LOC110772705	XP_021832854.1	191	early light-induced protein 1, chloroplastic-like	102.85	5.03	32.59	2.6e-12	3.47e-09	8.05e-08
29177	XM_021977174.1	LOC110772715	XP_021832866.1	198	early light-induced protein 1, chloroplastic-like	187.32	1.63	3.1	0.0012	0.05	1
29236	XM_021977241.1	LOC110772775	XP_021832933.1	452	uncharacterized protein LOC110772775 isoform X2	22.11	-2.35	-5.1	6.27e-07	0.000174	0.02
29269	XM_021977269.1	LOC110772801	XP_021832961.1	635	D-3-phosphoglycerate dehydrogenase 2, chloroplastic-like	5.71	-2.33	-5.03	0.000666	0.03	1
29298	XM_021977305.1	LOC110772831	XP_021832997.1	318	protein SRC2	179.58	1.77	3.41	0.000518	0.03	1
29304	XM_021977323.1	LOC110772844	XP_021833015.1	290	probable aquaporin PIP1-4	203.16	1.58	2.98	6.48e-06	0.00122	0.2
29315	XM_021977316.1	LOC110772837	XP_021833008.1	479	auxin transporter-like protein 2	12.53	-1.75	-3.37	0.000737	0.03	1
29343	XM_021977371.1	LOC110772887	XP_021833063.1	888	AMP deaminase-like isoform X2	8.17	2.94	7.69	2.61e-07	8.58e-05	0.00806
29377	XM_021977392.1	LOC110772902	XP_021833084.1	1025	uncharacterized protein LOC110772902 isoform X4	4.76	8.8	446.04	0.000684	0.03	1
29419	XM_021977437.1	LOC110772949	XP_021833129.1	269	chlorophyll a-b binding protein 3, chloroplastic	227.36	-1.46	-2.76	6e-06	0.00115	0.19
29420	XM_021977432.1	LOC110772942	XP_021833124.1	601	(-)-alpha-pinene synthase-like	139.53	-2.74	-6.67	1.3e-05	0.00205	0.4
29448	XM_021977481.1	LOC110772986	XP_021833173.1	535	abscisate beta-glucosyltransferase-like	405.27	1.83	3.57	6.92e-07	0.000189	0.02
29505	XM_021977557.1	LOC110773054	XP_021833249.1	384	disease resistance protein TAO1-like isoform X4	8.09	9.51	726.85	0.00126	0.05	1
29523	XM_021977560.1	LOC110773063	XP_021833252.1	1086	uncharacterized protein LOC110773063 isoform X1	1.99	4.83	28.43	0.00124	0.05	1
29574	XM_021977615.1	LOC110773108	XP_021833307.1	587	3beta-hydroxysteroid-dehydrogenase/decarboxylase isoform X2	12.23	4.25	19	0.00087	0.04	1
29639	XM_021977700.1	LOC110773195	XP_021833392.1	217	uncharacterized protein LOC110773195	45.7	-2.25	-4.75	3.03e-07	9.74e-05	0.00937
29689	XM_021977751.1	LOC110773249	XP_021833443.1	695	uncharacterized protein LOC110773249	3.63	4.53	23.09	0.00123	0.05	1
29700	XM_021977760.1	LOC110773255	XP_021833452.1	743	oligopeptide transporter 4-like	12.88	-1.34	-2.53	0.0004	0.02	1
29718	XM_021977782.1	LOC110773275	XP_021833474.1	547	uncharacterized protein LOC110773275	34.01	1.66	3.17	0.000401	0.02	1
29732	XM_021977826.1	LOC110773318	XP_021833518.1	395	protochlorophyllide reductase, chloroplastic	404.1	-2.33	-5.04	2.45e-12	3.45e-09	7.59e-08
29802	XM_021977882.1	LOC110773369	XP_021833574.1	640	uncharacterized protein LOC110773369	48.1	-1.72	-3.29	5.24e-07	0.000154	0.02
29805	XM_021977878.1	LOC110773366	XP_021833570.1	539	eukaryotic translation initiation factor 4B2 isoform X2	59.73	1.78	3.43	8.06e-06	0.00144	0.25
29822	XM_021977900.1	LOC110773387	XP_021833592.1	458	probable glycosyltransferase STELLO2	6.54	9.45	700.64	0.00125	0.05	1
29870	XM_021977944.1	LOC110773423	XP_021833636.1	359	alcohol dehydrogenase 1-like isoform X2	32.59	11.43	2758.21	1.04e-05	0.00172	0.32
29997	XM_021978118.1	LOC110773593	XP_021833810.1	502	uncharacterized protein LOC110773593 isoform X2	10.6	10.5	1446.72	1.87e-05	0.00264	0.58
30063	XM_021978174.1	LOC110773650	XP_021833866.1	413	RING-H2 finger protein ATL65	82.33	3.02	8.11	8.25e-07	0.000216	0.03
30196	XM_021978327.1	LOC110773806	XP_021834019.1	902	uncharacterized protein LOC110773806 isoform X2	2.09	6.61	97.64	0.000813	0.04	1
30214	XM_021978348.1	LOC110773827	XP_021834040.1	428	glyceraldehyde-3-phosphate dehydrogenase GAPCP1, chloroplastic-like	427.88	1.51	2.85	0.000257	0.02	1
30215	XM_021978340.1	LOC110773820	XP_021834032.1	436	uncharacterized protein LOC110773820 isoform X2	4.26	3.44	10.88	0.000872	0.04	1
30219	XM_021978353.1	LOC110773833	XP_021834045.1	532	DELLA protein RGL1-like	3.02	2.69	6.47	0.000451	0.02	1
30344	XM_021978512.1	LOC110773995	XP_021834204.1	724	CSC1-like protein ERD4	527.12	-1.01	-2.02	0.000998	0.04	1
30351	XM_021978553.1	LOC110774030	XP_021834245.1	468	uncharacterized protein LOC110774030 isoform X2	2.02	-5.52	-45.93	0.000453	0.03	1
30380	XM_021978575.1	LOC110774051	XP_021834267.1	472	ornithine aminotransferase, mitochondrial	69.93	-1.27	-2.41	0.00046	0.03	1
30382	XM_021978541.1	LOC110774022	XP_021834233.1	412	KH domain-containing protein At4g18375-like isoform X2	3.9	6.68	102.51	3.6e-05	0.00424	1
30425	XM_021978522.1	LOC110774004	XP_021834214.1	332	WD repeat-containing protein 70-like	9.57	4.7	26.08	0.000563	0.03	1
30445	XM_021978495.1	LOC110773980	XP_021834187.1	305	uncharacterized protein ycf23-like	66.68	-1.49	-2.82	0.001	0.04	1
30563	XM_021978732.1	LOC110774191	XP_021834424.1	674	probable leucine-rich repeat receptor-like serine/threonine-protein kinase At3g14840 isoform X1	6.97	3.45	10.96	0.000573	0.03	1
30572	XM_021978751.1	LOC110774209	XP_021834443.1	369	33 kDa ribonucleoprotein, chloroplastic-like	24.06	-1.48	-2.79	0.000356	0.02	1
30575	XM_021978750.1	LOC110774208	XP_021834442.1	369	33 kDa ribonucleoprotein, chloroplastic-like	21.41	-1.4	-2.63	0.000651	0.03	1
30605	XM_021978782.1	LOC110774243	XP_021834474.1	269	protein DDB_G0276689-like isoform X1	6.43	-5.4	-42.25	0.000197	0.01	1
30621	XM_021978803.1	LOC110774268	XP_021834495.1	224	uncharacterized protein LOC110774268	19.11	-1.91	-3.76	0.000248	0.02	1
30629	XM_021978813.1	LOC110774277	XP_021834505.1	119	stress-response A/B barrel domain-containing protein At5g22580	29.09	-2.85	-7.23	0.000117	0.01	1
30663	XM_021978855.1	LOC110774314	XP_021834547.1	438	shikimate O-hydroxycinnamoyltransferase-like	67.32	1.52	2.87	5.52e-05	0.0058	1
30672	XM_021978860.1	LOC110774326	XP_021834552.1	741	receptor-like protein 2	24.49	1.95	3.86	4.77e-05	0.00526	1
30723	XM_021978902.1	LOC110774370	XP_021834594.1	669	uncharacterized protein At1g04910-like	7.98	1.87	3.67	0.000894	0.04	1
30727	XM_021978910.1	LOC110774379	XP_021834602.1	758	neutral ceramidase 2 isoform X2	12.03	-1.74	-3.33	0.000108	0.00977	1
30857	XM_021979052.1	LOC110774511	XP_021834744.1	247	probable plastid-lipid-associated protein 8, chloroplastic	44.06	-1.68	-3.21	1.14e-05	0.00183	0.35
30898	XM_021979071.1	LOC110774526	XP_021834763.1	2645	golgin subfamily A member 4 isoform X4	3.38	8.77	438	0.000181	0.01	1
30979	XM_021979201.1	LOC110774632	XP_021834893.1	1300	ABC transporter G family member 39-like	23.96	-1.14	-2.21	0.000999	0.04	1
30989	XM_021944201.1	LOC110744237	XP_021799893.1	597	putative FBD-associated F-box protein At5g56700 isoform X2	3.78	-3.11	-8.65	0.000723	0.03	1
31032	XM_021944235.1	LOC110744270	XP_021799927.1	48	uncharacterized protein LOC110744270	22.02	-3.86	-14.56	0.0005	0.03	1
31085	XM_021944309.1	LOC110744331	XP_021800001.1	252	thylakoid lumenal 19 kDa protein, chloroplastic	27.25	-1.5	-2.82	0.000282	0.02	1
31263	XM_021944512.1	LOC110744518	XP_021800204.1	295	protein REVEILLE 8-like	23.48	1.37	2.59	0.000621	0.03	1
31272	XM_021944515.1	LOC110744524	XP_021800207.1	792	probable leucine-rich repeat receptor-like protein kinase At1g35710 isoform X1	8.88	1.45	2.73	0.000995	0.04	1
31327	XM_021944578.1	LOC110744593	XP_021800270.1	479	UDP-glycosyltransferase 86A1-like	9.97	-2.58	-6	0.000109	0.00984	1
31335	XM_021944590.1	LOC110744601	XP_021800282.1	277	xyloglucan endotransglucosylase/hydrolase 2-like	680.85	-2.88	-7.37	1.85e-13	3.52e-10	5.72e-09
31397	XM_021944657.1	LOC110744674	XP_021800349.1	984	cyclic nucleotide-gated ion channel 1-like	11.94	1.3	2.46	0.00039	0.02	1
31398	XM_021944658.1	LOC110744674	XP_021800350.1	984	cyclic nucleotide-gated ion channel 1-like	11.52	1.36	2.56	0.000456	0.03	1
31430	XM_021944701.1	LOC110744712	XP_021800393.1	142	photosystem I subunit O	151.8	-1.27	-2.41	0.00102	0.04	1
31448	XM_021944718.1	LOC110744731	XP_021800410.1	2333	uncharacterized protein LOC110744731 isoform X3	1.15	3.21	9.24	0.00063	0.03	1
31599	XM_021944876.1	LOC110744850	XP_021800568.1	459	protein BIG GRAIN 1-like A	8.16	-2.9	-7.47	0.000143	0.01	1
31630	XM_021944923.1	LOC110744887	XP_021800615.1	769	subtilisin-like protease SBT1.7	57.25	-1.52	-2.87	3.87e-06	0.000782	0.12
31867	XM_021945184.1	LOC110745105	XP_021800876.1	258	NAC domain-containing protein 83-like isoform X1	156.49	-1.23	-2.35	0.000434	0.02	1
31868	XM_021945185.1	LOC110745105	XP_021800877.1	256	NAC domain-containing protein 83-like isoform X2	19.39	-1.93	-3.81	0.000333	0.02	1
31879	XM_021945193.1	LOC110745113	XP_021800885.1	172	pEARLI1-like lipid transfer protein 1	46.73	3.34	10.11	9.29e-06	0.00161	0.29
31880	XM_021945192.1	LOC110745112	XP_021800884.1	176	lipid transfer protein EARLI 1-like	107.59	2.09	4.27	4.7e-05	0.00521	1
32089	XM_021945424.1	LOC110745346	XP_021801116.1	438	protein disulfide isomerase-like 2-3	52.86	-1.06	-2.09	0.0013	0.05	1
32130	XM_021945472.1	LOC110745392	XP_021801164.1	1366	DEAD-box ATP-dependent RNA helicase FANCM isoform X2	1.18	9.39	672.08	0.000656	0.03	1
32134	XM_021945485.1	LOC110745399	XP_021801177.1	310	transcription repressor MYB6-like	16.65	-3.46	-10.99	1.46e-06	0.000366	0.05
32221	XM_021945580.1	LOC110745482	XP_021801272.1	443	uncharacterized protein LOC110745482	101.97	1.46	2.75	0.00025	0.02	1
32420	XM_021945801.1	LOC110745682	XP_021801493.1	193	protein EXORDIUM-like 5	132.82	4.68	25.65	1.21e-08	6.34e-06	0.000376
32505	XM_021945896.1	LOC110745760	XP_021801588.1	430	LOW QUALITY PROTEIN: alpha-galactosidase 3	42.64	-1.67	-3.18	7.25e-05	0.0073	1
32604	XM_021946052.1	LOC110745893	XP_021801744.1	743	quinolinate synthase, chloroplastic	16.01	1.48	2.79	0.000129	0.01	1
32673	XM_021946088.1	LOC110745929	XP_021801780.1	556	(-)-alpha-pinene synthase-like	36.6	-5.16	-35.68	2.13e-15	7.11e-12	6.59e-11
32731	XM_021946154.1	LOC110745972	XP_021801846.1	448	ACT domain-containing protein ACR3 isoform X2	14.84	-2.31	-4.97	5.39e-08	2.21e-05	0.00167
32732	XM_021946156.1	LOC110745972	XP_021801848.1	448	ACT domain-containing protein ACR3 isoform X2	14.68	-2.31	-4.97	2.61e-08	1.14e-05	0.000808
32813	XM_021946246.1	LOC110746049	XP_021801938.1	324	transcription factor bHLH94-like	14.65	-2.84	-7.16	5.2e-05	0.0056	1
32942	XM_021946386.1	LOC110746173	XP_021802078.1	614	CTL-like protein DDB_G0274487	58.87	-1.59	-3.02	1.13e-05	0.00183	0.35
32954	XM_021946402.1	LOC110746193	XP_021802094.1	291	probable xyloglucan endotransglucosylase/hydrolase protein 6	1500.84	-1.57	-2.97	2.1e-05	0.00285	0.65
33192	XM_021946673.1	LOC110746452	XP_021802365.1	668	probable inactive receptor kinase At5g67200 isoform X1	22.51	2.15	4.43	0.000117	0.01	1
33223	XM_021946683.1	LOC110746465	XP_021802375.1	503	aspartyl protease family protein 2	9.08	-2.39	-5.24	9e-05	0.00854	1
33320	XM_021946823.1	LOC110746594	XP_021802515.1	1030	probable LRR receptor-like serine/threonine-protein kinase At3g47570 isoform X1	1.94	8.86	464	0.00103	0.04	1
33366	XM_021946880.1	LOC110746645	XP_021802572.1	789	uncharacterized protein LOC110746645 isoform X6	3.88	9.17	577.79	0.000509	0.03	1
33394	XM_021946870.1	LOC110746643	XP_021802562.1	166	plastocyanin	338.06	-1.26	-2.4	0.000263	0.02	1
33444	XM_021946959.1	LOC110746723	XP_021802651.1	495	cytochrome P450 CYP736A12-like	24.07	-3.63	-12.34	0.000578	0.03	1
33445	XM_021946961.1	LOC110746724	XP_021802653.1	493	cytochrome P450 CYP736A12-like	18.17	-2.35	-5.1	0.000203	0.02	1
33709	XM_021947268.1	LOC110747059	XP_021802960.1	523	receptor-like protein kinase FERONIA	4.89	-2.33	-5.04	0.00105	0.04	1
33729	XM_021947288.1	LOC110747082	XP_021802980.1	337	cytochrome P450 71A1-like	14.06	-3.56	-11.76	1.22e-05	0.00194	0.38
33849	XM_021947429.1	LOC110747224	XP_021803121.1	946	glutamate receptor 2.7-like isoform X1	8.55	1.43	2.69	0.00105	0.04	1
33851	XM_021947431.1	LOC110747224	XP_021803123.1	767	glutamate receptor 2.7-like isoform X3	4.59	5.88	58.86	2.52e-05	0.00318	0.78
34064	XM_021947671.1	LOC110747510	XP_021803363.1	181	(-)-alpha-pinene synthase-like	406.85	-1.35	-2.55	0.000269	0.02	1
34228	XM_021947860.1	LOC110747749	XP_021803552.1	228.667	cytochrome P450 82G1-like	50.58	2.64	6.23	3.21e-05	0.00388	0.99
34380	XM_021948035.1	LOC110747985	XP_021803727.1	329	probable indole-3-pyruvate monooxygenase YUCCA10	16.68	10.33	1290.37	0.000273	0.02	1
34422	XM_021948079.1	LOC110748038	XP_021803771.1	232.333	cyclin-D3-2-like	17.87	9.93	975.84	0.000652	0.03	1
34524	XM_021948191.1	LOC110748165	XP_021803883.1	145	phosphatidylinositol/phosphatidylcholine transfer protein SFH8-like	27.42	9.87	936.53	0.000741	0.03	1
34555	XM_021948224.1	LOC110748208	XP_021803916.1	244	protein MIZU-KUSSEI 1-like	17.9	-1.72	-3.29	0.000513	0.03	1
34652	XM_021948336.1	LOC110748344	XP_021804028.1	223	transketolase, chloroplastic-like	23.58	10.28	1245.74	3.54e-05	0.00418	1
34718	XM_021948412.1	LOC110748433	XP_021804104.1	269	BUD13 homolog	25.76	1.38	2.6	0.000585	0.03	1
34775	XM_021948475.1	LOC110748500	XP_021804167.1	364	low-temperature-induced 65 kDa protein-like	9.6	9.68	818.58	0.00107	0.04	1
34792	XM_021948493.1	LOC110748521	XP_021804185.1	156	36.4 kDa proline-rich protein-like; frame=3	1576.52	1.37	2.59	0.000669	0.03	1
34802	XM_021948505.1	LOC110748535	XP_021804197.1	152	chaperone protein dnaJ 8, chloroplastic-like	15.12	-2.22	-4.66	0.000546	0.03	1
34838	XM_021948544.1	LOC110748582	XP_021804236.1	246	probable transmembrane ascorbate ferrireductase 4	9.82	-2.17	-4.51	0.000876	0.04	1
34908	XM_021948624.1	LOC110748671	XP_021804316.1	530	phenylalanine ammonia-lyase 1	315.75	2.35	5.1	7.36e-05	0.00735	1
35004	XM_021948729.1	LOC110748781	XP_021804421.1	1102	putative phospholipid-transporting ATPase 9	1.67	6.57	95.26	2.45e-06	0.000545	0.08
35009	XM_021948735.1	LOC110748786	XP_021804427.1	734	ferric reduction oxidase 7, chloroplastic-like	23.79	-1.67	-3.17	1.68e-06	0.000401	0.05

## Sheet: S4_local_A1M197
Supplementary Table S4. The differentially expressed genes from the local samples of sweet cherry inoculated with Pss strain A1M197.
No. protein	Gene	Gene ID (LOC)	Protein ID	Size (aa)	Description	Max group mean	Log₂ fold change	Fold change	P-value	FDR p-value	Bonferroni
482	XM_021950757.1	LOC110750416	XP_021806449.1	1652	uncharacterized protein LOC110750416 isoform X2	23.26	1.33	2.51	0.000102	0.02	1
718	XM_021953049.1	LOC110752401	XP_021808741.1	479	polygalacturonase At1g48100	36.77	-1.46	-2.76	0.000363	0.05	1
822	XM_021953650.1	LOC110752889	XP_021809342.1	663	low affinity sulfate transporter 3	16.64	-2.76	-6.76	6.63e-06	0.0025	0.21
882	XM_021954432.1	LOC110753517	XP_021810124.1	451	beta-1,3-galactosyltransferase 7 isoform X1	3	-6.59	-96.36	4.51e-05	0.01	1
919	XM_021955180.1	LOC110754141	XP_021810872.1	337	flavonol synthase/flavanone 3-hydroxylase	47.99	2.8	6.97	0.000163	0.03	1
1423	XM_021960027.1	LOC110758216	XP_021815719.1	190	histone H1	1529.95	-1.79	-3.45	2.26e-06	0.00118	0.07
1659	XM_021963217.1	LOC110760867	XP_021818909.1	232	two-component response regulator ARR5-like	26.24	-1.87	-3.65	0.000359	0.05	1
1802	XM_021964631.1	LOC110762036	XP_021820323.1	245	glucan endo-1,3-beta-glucosidase-like	20.62	-7.56	-189.1	7.01e-07	0.000476	0.02
2489	XM_021972059.1	LOC110768335	XP_021827751.1	379	GDSL esterase/lipase EXL3-like	2.82	-4.33	-20.16	0.000319	0.04	1
2507	XM_021972129.1	LOC110768395	XP_021827821.1	1847	uncharacterized protein LOC110768395	10.76	1.21	2.32	0.000301	0.04	1
2684	XM_021974475.1	LOC110770346	XP_021830167.1	120	organ-specific protein S2-like	34.91	-4.99	-31.81	1.69e-07	0.000139	0.00522
2686	XM_021974229.1	LOC110770140	XP_021829921.1	131	organ-specific protein S2-like	114.3	-1.55	-2.93	5.46e-05	0.01	1
2980	XM_021976408.1	LOC110772028	XP_021832100.1	566	asparagine--tRNA ligase, cytoplasmic 1-like isoform X2	9.22	10.06	1066.67	9.16e-05	0.02	1
3072	XM_021978182.1	LOC110773658	XP_021833874.1	435	AAA-ATPase At2g18193-like	27.08	-2.15	-4.45	5.24e-07	0.000366	0.02
3834	XM_021948968.1	LOC110748978	XP_021804660.1	379	early nodulin-75-like	49.43	-3.59	-12.06	9.12e-09	1.31e-05	0.000282
4194	XM_021949161.1	LOC110749140	XP_021804853.1	750	sucrose synthase	17.88	-1.57	-2.96	1.97e-05	0.00559	0.61
4195	XM_021949163.1	LOC110749140	XP_021804855.1	750	sucrose synthase	16.93	-1.64	-3.11	2.85e-05	0.0072	0.88
4196	XM_021949164.1	LOC110749140	XP_021804856.1	750	sucrose synthase	17.24	-1.61	-3.06	2.28e-05	0.00607	0.71
4334	XM_021949423.1	LOC110749336	XP_021805115.1	810	sucrose synthase 3	606.48	1.42	2.67	1.09e-05	0.00359	0.34
4476	XM_021949698.1	LOC110749579	XP_021805390.1	487	anthocyanidin 3-O-glucosyltransferase 2-like	22.08	2.6	6.07	6.71e-08	6.57e-05	0.00208
5245	XM_021950567.1	LOC110750267	XP_021806259.1	103	late embryogenesis abundant protein Lea5	42.96	-2.37	-5.15	8.37e-05	0.02	1
5353	XM_021950638.1	LOC110750328	XP_021806330.1	310	NADP-dependent D-sorbitol-6-phosphate dehydrogenase-like	268.81	1.88	3.68	4.44e-08	4.94e-05	0.00138
5522	XM_021950772.1	LOC110750435	XP_021806464.1	540	heavy metal-associated isoprenylated plant protein 32 isoform X1	11.11	-2.1	-4.28	0.000245	0.04	1
5527	XM_021950767.1	LOC110750430	XP_021806459.1	424	basic 7S globulin-like	11.59	-4.25	-19.07	3.14e-07	0.00024	0.00973
5618	XM_021950866.1	LOC110750527	XP_021806558.1	253	two-component response regulator ORR4-like isoform X2	8.86	-4.03	-16.28	2.05e-06	0.00111	0.06
5701	XM_021951001.1	LOC110750642	XP_021806693.1	580	protein VASCULAR ASSOCIATED DEATH 1, chloroplastic	159.75	1.29	2.45	0.000145	0.03	1
5865	XM_021951152.1	LOC110750787	XP_021806844.1	505	trans-cinnamate 4-monooxygenase	418.89	1.48	2.79	2.37e-05	0.00624	0.73
6383	XM_021951748.1	LOC110751303	XP_021807440.1	810	phosphate transporter PHO1 homolog 3-like isoform X2	3.22	-6.73	-106.34	2.97e-06	0.00145	0.09
6428	XM_021951767.1	LOC110751321	XP_021807459.1	499	probable apyrase 6 isoform X2	4.97	-2.17	-4.51	0.000374	0.05	1
6504	XM_021951901.1	LOC110751428	XP_021807593.1	903	alpha-amylase 3, chloroplastic isoform X2	298.14	1.23	2.35	0.00011	0.02	1
6571	XM_021951973.1	LOC110751500	XP_021807665.1	413	probable pectate lyase 18	17.2	-3.64	-12.48	4.71e-08	5.01e-05	0.00146
6603	XM_021952030.1	LOC110751548	XP_021807722.1	654	probable ADP-ribosylation factor GTPase-activating protein AGD14 isoform X2	2.09	-6.31	-79.5	0.000172	0.03	1
6841	XM_021952305.1	LOC110751791	XP_021807997.1	1236	BAG family molecular chaperone regulator 6	158.67	3	7.99	3.92e-10	8.73e-07	1.21e-05
6843	XM_021952271.1	LOC110751766	XP_021807963.1	300	acidic endochitinase-like	315.6	-2.39	-5.23	3.88e-05	0.00914	1
6844	XM_021952341.1	LOC110751817	XP_021808033.1	313	acidic endochitinase-like	261.19	-2.11	-4.31	3.18e-10	7.78e-07	9.84e-06
6887	XM_021952302.1	LOC110751787	XP_021807994.1	148	desiccation protectant protein Lea14 homolog	155.71	2.12	4.36	1.34e-06	0.000779	0.04
6915	XM_021952399.1	LOC110751868	XP_021808091.1	475	probable polygalacturonase	194.59	-2.46	-5.51	4.08e-13	2e-09	1.26e-08
7082	XM_021952571.1	LOC110751997	XP_021808263.1	443	aspartyl protease AED3	9.53	-2.93	-7.62	5.85e-06	0.00235	0.18
7114	XM_021952422.1	LOC110751889	XP_021808114.1	240	MADS-box protein JOINTLESS-like isoform X5	106.36	-1.63	-3.1	3.77e-06	0.00175	0.12
7187	XM_021952668.1	LOC110752079	XP_021808360.1	597	protein NRT1/ PTR FAMILY 2.11-like	98.08	1.63	3.1	2.22e-06	0.00118	0.07
7344	XM_021952835.1	LOC110752223	XP_021808527.1	272	secoisolariciresinol dehydrogenase-like	13.03	-3.02	-8.14	0.000263	0.04	1
7345	XM_021952834.1	LOC110752222	XP_021808526.1	272	secoisolariciresinol dehydrogenase-like	110.23	-1.94	-3.83	5.69e-06	0.00235	0.18
7574	XM_021953097.1	LOC110752441	XP_021808789.1	386	protein CLP1 homolog isoform X2	6.1	-7.31	-158.5	1.76e-06	0.000981	0.05
7580	XM_021953086.1	LOC110752434	XP_021808778.1	1074	inositol hexakisphosphate and diphosphoinositol-pentakisphosphate kinase VIP1-like isoform X1	1.61	-4.9	-29.89	6.84e-06	0.00254	0.21
7672	XM_021953205.1	LOC110752525	XP_021808897.1	454	flavonoid 3-O-glucosyltransferase-like	63.46	2.11	4.32	1.04e-05	0.00347	0.32
7725	XM_021953288.1	LOC110752600	XP_021808980.1	702	large proline-rich protein bag6 isoform X2	9.13	3	7.98	2.15e-05	0.00592	0.67
7736	XM_021953291.1	LOC110752601	XP_021808983.1	1439	uncharacterized protein LOC110752601 isoform X2	0.44	6.01	64.54	0.000117	0.02	1
8105	XM_021953667.1	LOC110752910	XP_021809359.1	680	protein LNK1 isoform X1	1.8	-3.84	-14.27	0.000216	0.03	1
8129	XM_021953753.1	LOC110752971	XP_021809445.1	299	methylesterase 3-like	18.53	-2.85	-7.2	0.000135	0.02	1
8622	XM_021954314.1	LOC110753408	XP_021810006.1	461	COBRA-like protein 4	3.8	-3.18	-9.09	0.000366	0.05	1
8753	XM_021954490.1	LOC110753565	XP_021810182.1	534	glucomannan 4-beta-mannosyltransferase 9-like	10.35	-2.91	-7.52	0.000361	0.05	1
8811	XM_021954466.1	LOC110753545	XP_021810158.1	504	IQ domain-containing protein IQM3-like	55.32	-1.41	-2.66	0.000245	0.04	1
8901	XM_021954628.1	LOC110753685	XP_021810320.1	1104	TMV resistance protein N-like isoform X1	7.45	5.2	36.65	9.88e-06	0.00336	0.31
9104	XM_021954670.1	LOC110753722	XP_021810362.1	359	(RS)-norcoclaurine 6-O-methyltransferase-like	17.11	-4.03	-16.29	5.34e-06	0.00229	0.17
9114	XM_021954899.1	LOC110753913	XP_021810591.1	585	probable serine/threonine-protein kinase WNK4 isoform X1	69.27	1.41	2.66	6.21e-05	0.01	1
9171	XM_021954817.1	LOC110753837	XP_021810509.1	370	GDSL esterase/lipase At2g30310-like	24.05	1.82	3.54	1.31e-05	0.00402	0.41
9172	XM_021954818.1	LOC110753837	XP_021810510.1	370	GDSL esterase/lipase At2g30310-like	24.96	2.11	4.33	8.88e-07	0.000572	0.03
9604	XM_021955296.1	LOC110754246	XP_021810988.1	225	uncharacterized protein LOC110754246 isoform X4	8.62	3.76	13.53	0.00016	0.03	1
9637	XM_021955371.1	LOC110754313	XP_021811063.1	216	histone H1-like	364.38	-2.43	-5.4	5.49e-09	8.96e-06	0.00017
10039	XM_021955823.1	LOC110754719	XP_021811515.1	312	serine acetyltransferase 4-like isoform X2	4.64	-5.06	-33.34	6.09e-05	0.01	1
10456	XM_021956358.1	LOC110755183	XP_021812050.1	94	protein RSI-1	13.36	-4.09	-17.04	0.000394	0.05	1
10729	XM_021956643.1	LOC110755444	XP_021812335.1	1732	helicase protein MOM1-like isoform X2	1.43	5.23	37.59	2.15e-05	0.00592	0.67
10890	XM_021956770.1	LOC110755543	XP_021812462.1	715	CSC1-like protein HYP1 isoform X1	173.38	1.25	2.38	9.84e-05	0.02	1
10946	XM_021956890.1	LOC110755654	XP_021812582.1	418	zinc finger protein CONSTANS-LIKE 9-like	34.64	-1.29	-2.44	0.00025	0.04	1
11060	XM_021956978.1	LOC110755726	XP_021812670.1	763	DUF724 domain-containing protein 7 isoform X5	2.99	4.81	28	0.000109	0.02	1
11695	XM_021957676.1	LOC110756268	XP_021813368.1	1111	eIF-2-alpha kinase GCN2 isoform X2	1.41	5.64	49.87	0.000158	0.03	1
11983	XM_021958112.1	LOC110756661	XP_021813804.1	483	ultraviolet-B receptor UVR8-like isoform X2	23.01	1.37	2.58	0.000152	0.03	1
12012	XM_021958026.1	LOC110756586	XP_021813718.1	499	glycerol-3-phosphate acyltransferase 5-like	18.64	-2.8	-6.95	2.6e-06	0.0013	0.08
12296	XM_021958441.1	LOC110756942	XP_021814133.1	1542	probable phosphoinositide phosphatase SAC9 isoform X2	5.95	10.87	1874.88	9.42e-06	0.0033	0.29
12315	XM_021958369.1	LOC110756887	XP_021814061.1	634	uncharacterized protein LOC110756887 isoform X2	1.14	-6.88	-117.41	0.000249	0.04	1
12499	XM_021958577.1	LOC110757057	XP_021814269.1	447	cytochrome P450 71A25-like	10.78	-2.08	-4.23	0.000265	0.04	1
12500	XM_021958579.1	LOC110757058	XP_021814271.1	556	(-)-alpha-pinene synthase-like isoform X2	172.1	-3.77	-13.63	1.77e-11	6.18e-08	5.47e-07
12501	XM_021958578.1	LOC110757058	XP_021814270.1	557	(-)-alpha-pinene synthase-like isoform X1	19.77	-3.34	-10.15	1.35e-08	1.84e-05	0.000418
12528	XM_021958604.1	LOC110757076	XP_021814296.1	314	transcription factor PCL1	14	-2.27	-4.83	1.76e-05	0.00507	0.55
12529	XM_021958605.1	LOC110757076	XP_021814297.1	314	transcription factor PCL1	13.5	-2.24	-4.74	3.55e-05	0.00843	1
12530	XM_021958606.1	LOC110757076	XP_021814298.1	314	transcription factor PCL1	14.62	-2.13	-4.37	0.000131	0.02	1
12610	XM_021958655.1	LOC110757111	XP_021814347.1	624	putative leucine-rich repeat receptor-like serine/threonine-protein kinase At2g14440 isoform X2	5.42	-10.28	-1240.05	2.71e-05	0.00699	0.84
12701	XM_021958840.1	LOC110757264	XP_021814532.1	968	receptor-like protein kinase HAIKU2 isoform X2	11.46	3.92	15.16	1.6e-05	0.00467	0.5
12923	XM_021959102.1	LOC110757481	XP_021814794.1	745	transcription factor bHLH155 isoform X1	2.59	3.6	12.13	0.000165	0.03	1
12957	XM_021959053.1	LOC110757455	XP_021814745.1	476	patellin-4-like	5.99	2.56	5.88	3e-05	0.0075	0.93
13067	XM_021959202.1	LOC110757550	XP_021814894.1	262	putative methyltransferase DDB_G0268948	46.69	3.38	10.42	1.83e-13	1.12e-09	5.68e-09
13135	XM_021959337.1	LOC110757651	XP_021815029.1	245	uncharacterized protein At4g00950	30.08	-1.9	-3.73	5.89e-05	0.01	1
13566	XM_021959768.1	LOC110757995	XP_021815460.1	522	sugar carrier protein C	14.89	-2.27	-4.83	3.85e-08	4.49e-05	0.00119
13954	XM_021960241.1	LOC110758380	XP_021815933.1	1020	calcium-transporting ATPase 10, plasma membrane-type-like isoform X2	6.06	4.3	19.66	4.07e-05	0.0095	1
14014	XM_021960151.1	LOC110758323	XP_021815843.1	385	oxysterol-binding protein-related protein 4B	21.68	1.76	3.38	2.81e-05	0.00716	0.87
14261	XM_021960621.1	LOC110758705	XP_021816313.1	522	cytochrome P450 86A1-like	17.35	-2.88	-7.36	1.35e-05	0.00403	0.42
14607	XM_021960910.1	LOC110758931	XP_021816602.1	722	uncharacterized protein LOC110758931 isoform X5	3.78	8.87	467.35	0.000382	0.05	1
14702	XM_021960974.1	LOC110758987	XP_021816666.1	1776	nuclear pore complex protein NUP214 isoform X1	1.62	-8.91	-480.14	0.000206	0.03	1
14756	XM_021961082.1	LOC110759059	XP_021816774.1	345	collagen alpha-5(IV) chain-like isoform X2	74.77	-2.15	-4.44	9.79e-08	9.22e-05	0.00303
14757	XM_021961081.1	LOC110759059	XP_021816773.1	400	collagen alpha-2(IV) chain-like isoform X1	45.36	-2.35	-5.09	7.86e-09	1.2e-05	0.000243
14896	XM_021961261.1	LOC110759222	XP_021816953.1	951	formin-like protein 11 isoform X1	2.12	-6.78	-109.6	1.55e-05	0.00459	0.48
15360	XM_021961782.1	LOC110759687	XP_021817474.1	343	transcription factor bHLH94-like	16.7	-2.14	-4.42	0.000145	0.03	1
15379	XM_021961752.1	LOC110759666	XP_021817444.1	387	uncharacterized protein LOC110759666	41.99	-1.47	-2.76	0.000118	0.02	1
15422	XM_021961871.1	LOC110759751	XP_021817563.1	1297	golgin subfamily A member 4-like isoform X2	0.72	4.7	25.95	0.000307	0.04	1
15581	XM_021962065.1	LOC110759922	XP_021817757.1	1420	ABC transporter G family member 32 isoform X1	2.15	-3.06	-8.32	7.39e-05	0.02	1
15802	XM_021962260.1	LOC110760073	XP_021817952.1	2347	small subunit processome component 20 homolog isoform X3	1.37	6.35	81.52	8.6e-06	0.00305	0.27
15804	XM_021962292.1	LOC110760106	XP_021817984.1	896	N-terminal acetyltransferase A complex auxiliary subunit NAA15 isoform X2	3.1	2.94	7.67	0.000188	0.03	1
16048	XM_021962523.1	LOC110760279	XP_021818215.1	1055	protein GIGANTEA isoform X3	8.74	11.17	2297.66	4.13e-06	0.00184	0.13
16135	XM_021962599.1	LOC110760351	XP_021818291.1	486	CBS domain-containing protein CBSCBSPB1-like isoform X2	6.25	4.97	31.32	9.61e-06	0.00331	0.3
16146	XM_021962625.1	LOC110760372	XP_021818317.1	237	nuclear transcription factor Y subunit C-1 isoform X2	2.37	-9.39	-671.48	0.000289	0.04	1
16278	XM_021962813.1	LOC110760532	XP_021818505.1	1064	uncharacterized protein LOC110760532 isoform X3	2	9.94	980.48	0.000135	0.02	1
16379	XM_021962892.1	LOC110760590	XP_021818584.1	150	auxin-responsive protein SAUR71-like	82.7	-2.03	-4.07	0.000135	0.02	1
16434	XM_021962953.1	LOC110760654	XP_021818645.1	310	ethylene-responsive transcription factor ERF061	236.11	-1.54	-2.92	7.14e-06	0.00261	0.22
16436	XM_021962909.1	LOC110760608	XP_021818601.1	620	endoglucanase 6	121.21	-2.68	-6.39	1.25e-05	0.00398	0.39
16821	XM_021963408.1	LOC110761032	XP_021819100.1	103	histone H4	35.67	-2.12	-4.33	0.00029	0.04	1
17718	XM_021964438.1	LOC110761855	XP_021820130.1	107	monothiol glutaredoxin-S1-like	13.22	-6.1	-68.74	2.63e-05	0.00685	0.81
17779	XM_021964372.1	LOC110761806	XP_021820064.1	1508	ABC transporter C family member 14-like isoform X1	25.02	1.54	2.91	9.46e-05	0.02	1
17780	XM_021964373.1	LOC110761806	XP_021820065.1	1508	ABC transporter C family member 14-like isoform X1	23.97	1.45	2.73	0.000154	0.03	1
17781	XM_021964374.1	LOC110761806	XP_021820066.1	1508	ABC transporter C family member 14-like isoform X1	23.67	1.52	2.86	0.000103	0.02	1
17825	XM_021964521.1	LOC110761939	XP_021820213.1	90	uncharacterized protein LOC110761939	913.38	1.61	3.06	6.24e-05	0.01	1
17878	XM_021964471.1	LOC110761885	XP_021820163.1	248	uncharacterized protein LOC110761885 isoform X1	59.53	-1.72	-3.3	1.27e-05	0.00399	0.39
17997	XM_021964649.1	LOC110762056	XP_021820341.1	103	histone H4	113.12	-2.4	-5.28	1.59e-10	4.32e-07	4.92e-06
18125	XM_021964804.1	LOC110762199	XP_021820496.1	212	uncharacterized protein LOC110762199	115.2	-2.43	-5.41	0.000156	0.03	1
18208	XM_021964981.1	LOC110762353	XP_021820673.1	366	GDSL esterase/lipase At1g74460	14.32	-2.94	-7.7	3.38e-05	0.00812	1
18401	XM_021965122.1	LOC110762475	XP_021820814.1	482	probable polygalacturonase	25.27	-1.7	-3.26	5.85e-05	0.01	1
18424	XM_021965143.1	LOC110762494	XP_021820835.1	635	uncharacterized protein LOC110762494 isoform X3	4.67	4.56	23.57	2.58e-06	0.0013	0.08
18738	XM_021965520.1	LOC110762826	XP_021821212.1	513	cytochrome P450 71A25-like	34.17	-2.28	-4.85	4.63e-07	0.000333	0.01
18781	XM_021965551.1	LOC110762851	XP_021821243.1	320	nicotianamine synthase	53.21	-2.55	-5.85	9.31e-05	0.02	1
18985	XM_021965811.1	LOC110763067	XP_021821503.1	1130	starch synthase 3, chloroplastic/amyloplastic isoform X3	1.06	4.99	31.89	0.000296	0.04	1
19340	XM_021966204.1	LOC110763418	XP_021821896.1	873	probable myosin-binding protein 4 isoform X1	2.63	4.81	28.12	4.11e-06	0.00184	0.13
19376	XM_021966234.1	LOC110763446	XP_021821926.1	768	protein LONGIFOLIA 1	15.22	-2.92	-7.57	0.000218	0.03	1
19391	XM_021966285.1	LOC110763490	XP_021821977.1	436	lysine-specific demethylase 8 isoform X3	3.28	-9.17	-574.55	0.000286	0.04	1
19522	XM_021966376.1	LOC110763567	XP_021822068.1	573	protein SIEVE ELEMENT OCCLUSION B-like	130.91	-1.91	-3.77	1.47e-07	0.000128	0.00454
19693	XM_021966591.1	LOC110763750	XP_021822283.1	178	uncharacterized protein LOC110763750	27.62	-2.73	-6.64	0.000299	0.04	1
19957	XM_021966861.1	LOC110763971	XP_021822553.1	868	linoleate 13S-lipoxygenase 2-1, chloroplastic-like	6.42	-2.19	-4.55	0.000177	0.03	1
20015	XM_021966973.1	LOC110764063	XP_021822665.1	769	protein LHY isoform X1	92.94	3.2	9.19	9.85e-23	2.41e-18	3.05e-18
20016	XM_021966974.1	LOC110764063	XP_021822666.1	769	protein LHY isoform X1	91.06	3.13	8.78	3.06e-21	3.74e-17	9.47e-17
20057	XM_021967057.1	LOC110764133	XP_021822749.1	450	zinc finger protein CONSTANS-LIKE 6-like	19.26	-2.68	-6.42	4.28e-10	8.74e-07	1.33e-05
20074	XM_021966996.1	LOC110764083	XP_021822688.1	311	uncharacterized protein LOC110764083	15.17	-1.71	-3.28	0.000248	0.04	1
20322	XM_021967427.1	LOC110764444	XP_021823119.1	439	calcium-binding mitochondrial carrier protein SCaMC-2-B-like isoform X2	3.27	-8.27	-309.39	0.000358	0.05	1
20398	XM_021967440.1	LOC110764452	XP_021823132.1	446	omega-hydroxypalmitate O-feruloyl transferase-like	19.18	-3.28	-9.75	1.07e-06	0.000652	0.03
20695	XM_021967783.1	LOC110764762	XP_021823475.1	277	expansin-B15-like	20.48	-5.61	-48.76	4.03e-11	1.23e-07	1.25e-06
20966	XM_021968012.1	LOC110764953	XP_021823704.1	191	CASP-like protein 1B1	36.61	-2.59	-6.02	0.000354	0.05	1
21112	XM_021968160.1	LOC110765104	XP_021823852.1	215	glutathione S-transferase F11-like	14.35	6.83	113.39	2.33e-08	2.85e-05	0.000722
21269	XM_021968346.1	LOC110765262	XP_021824038.1	1005	probable leucine-rich repeat receptor-like serine/threonine-protein kinase At3g14840	66.99	-1.5	-2.84	3.8e-06	0.00175	0.12
21439	XM_021968595.1	LOC110765460	XP_021824287.1	536	protein DETOXIFICATION 12-like	45.04	1.42	2.68	0.000314	0.04	1
21923	XM_021969072.1	LOC110765833	XP_021824764.1	457	uncharacterized protein LOC110765833 isoform X2	13.11	-2.51	-5.68	5.23e-06	0.00229	0.16
22005	XM_021969203.1	LOC110765953	XP_021824895.1	364	uncharacterized oxidoreductase At1g06690, chloroplastic	79.91	1.68	3.21	7.49e-06	0.0027	0.23
22309	XM_021969502.1	LOC110766214	XP_021825194.1	1981	E3 ubiquitin-protein ligase PRT6 isoform X2	8.09	7.97	250.76	1.13e-12	4.6e-09	3.49e-08
22406	XM_021969614.1	LOC110766312	XP_021825306.1	596	potassium channel KAT3	5.7	-2.71	-6.55	6.5e-06	0.0025	0.2
22587	XM_021969856.1	LOC110766517	XP_021825548.1	668	L-type lectin-domain containing receptor kinase IV.1-like	7.55	-1.89	-3.69	3.26e-05	0.0079	1
22635	XM_021969864.1	LOC110766527	XP_021825556.1	300	expansin-A6-like	14.17	-2.58	-5.96	0.000332	0.04	1
22854	XM_021970132.1	LOC110766769	XP_021825824.1	255	stem-specific protein TSJT1-like	81.53	-1.92	-3.78	1.3e-05	0.00402	0.4
22911	XM_021970205.1	LOC110766817	XP_021825897.1	293	uncharacterized protein LOC110766817	28.73	-3.08	-8.43	3.4e-06	0.00163	0.11
23073	XM_021970351.1	LOC110766929	XP_021826043.1	1030	uncharacterized protein LOC110766929 isoform X3	2.41	3.9	14.92	7.69e-05	0.02	1
23688	XM_021971038.1	LOC110767486	XP_021826730.1	704	ABC transporter G family member 11-like	307.58	2.41	5.32	1.67e-09	3.15e-06	5.18e-05
23773	XM_021971136.1	LOC110767559	XP_021826828.1	356	uncharacterized protein LOC110767559	16.17	1.46	2.76	0.000303	0.04	1
23883	XM_021971290.1	LOC110767680	XP_021826982.1	118	uncharacterized protein LOC110767680	105.84	-1.53	-2.89	8.22e-05	0.02	1
23909	XM_021971244.1	LOC110767647	XP_021826936.1	620	low-temperature-induced 65 kDa protein-like isoform X4	79.13	1.98	3.95	1.57e-06	0.000891	0.05
23911	XM_021971241.1	LOC110767647	XP_021826933.1	728	low-temperature-induced 65 kDa protein-like isoform X1	200.88	2.02	4.05	1.25e-06	0.000749	0.04
23912	XM_021971243.1	LOC110767647	XP_021826935.1	620	low-temperature-induced 65 kDa protein-like isoform X3	83.52	2.17	4.51	1.05e-06	0.000652	0.03
24051	XM_021971315.1	LOC110767695	XP_021827007.1	293	acidic endochitinase-like	15.19	-2.22	-4.65	3.12e-05	0.0077	0.97
24060	XM_021971176.1	LOC110767592	XP_021826868.1	1478	ABC transporter C family member 10-like	54.09	2.19	4.57	1.71e-07	0.000139	0.00528
24071	XM_021971462.1	LOC110767810	XP_021827154.1	841	beta-galactosidase 1-like	12.05	-1.55	-2.92	0.000398	0.05	1
24076	XM_021971473.1	LOC110767818	XP_021827165.1	424	DEAD-box ATP-dependent RNA helicase 20 isoform X2	4.2	-9.36	-658.43	0.00014	0.03	1
24387	XM_021971822.1	LOC110768138	XP_021827514.1	475	glucan endo-1,3-beta-glucosidase 12-like	2.86	-3.44	-10.88	0.000305	0.04	1
24547	XM_021972000.1	LOC110768291	XP_021827692.1	328	heat stress transcription factor C-1	6.64	-2.68	-6.43	2.27e-05	0.00607	0.7
24693	XM_021972152.1	LOC110768424	XP_021827844.1	788	AMP deaminase isoform X3	1.2	-6.23	-75.12	0.000237	0.04	1
24872	XM_021972341.1	LOC110768568	XP_021828033.1	269	protein TORNADO 2	37.69	-1.59	-3.02	0.000191	0.03	1
24961	XM_021972422.1	LOC110768617	XP_021828114.1	513	protease Do-like 10, mitochondrial isoform X2	1.91	-11.33	-2572.41	6.46e-06	0.0025	0.2
25364	XM_021972864.1	LOC110768974	XP_021828556.1	178	LOB domain-containing protein 4-like	36.9	-1.91	-3.76	0.000124	0.02	1
25387	XM_021972912.1	LOC110769012	XP_021828604.1	619	probable serine/threonine-protein kinase WNK5	20.76	-2.32	-5	0.000386	0.05	1
26230	XM_021973890.1	LOC110769850	XP_021829582.1	154	uncharacterized protein LOC110769850	112.05	-1.96	-3.89	2.29e-07	0.000181	0.00708
26805	XM_021974538.1	LOC110770400	XP_021830230.1	287	protein E6-like	76.6	-1.83	-3.55	5.38e-05	0.01	1
27142	XM_021974921.1	LOC110770716	XP_021830613.1	614	BTB/POZ domain-containing protein At5g48800	14.24	-2	-3.99	6.6e-06	0.0025	0.2
27300	XM_021975063.1	LOC110770841	XP_021830755.1	717	increased DNA methylation 1 isoform X2	2.44	5.02	32.39	0.000232	0.04	1
27334	XM_021975096.1	LOC110770872	XP_021830788.1	480	serine carboxypeptidase-like 31	184.83	-4.02	-16.23	1.47e-07	0.000128	0.00454
27487	XM_021975271.1	LOC110771031	XP_021830963.1	2537	uncharacterized protein LOC110771031 isoform X3	0.88	4.77	27.35	0.000147	0.03	1
27697	XM_021975527.1	LOC110771260	XP_021831219.1	155	chaperone protein dnaJ 11, chloroplastic-like	168.53	-1.39	-2.62	0.000399	0.05	1
27724	XM_021975551.1	LOC110771280	XP_021831243.1	420	methylthioribose kinase-like	33.37	1.78	3.43	2.28e-05	0.00607	0.71
28008	XM_021975853.1	LOC110771536	XP_021831545.1	276	cytochrome P450 98A2-like	94.43	1.16	2.23	0.000296	0.04	1
28019	XM_021975856.1	LOC110771543	XP_021831548.1	542	cytokinin dehydrogenase 5	14.4	-2.19	-4.55	0.000319	0.04	1
28159	XM_021976043.1	LOC110771696	XP_021831735.1	585	ferredoxin--nitrite reductase, chloroplastic	6.03	-2.62	-6.16	0.000389	0.05	1
28471	XM_021976376.1	LOC110772014	XP_021832068.1	225	two-component response regulator ORR9-like	44.81	-1.51	-2.86	0.000241	0.04	1
28513	XM_021976475.1	LOC110772088	XP_021832167.1	2474	protein SABRE isoform X2	1.23	3.96	15.54	0.000138	0.02	1
28587	XM_021976506.1	LOC110772107	XP_021832198.1	483	amino acid permease 6	26.96	-2.83	-7.12	0.000293	0.04	1
28610	XM_021976533.1	LOC110772127	XP_021832225.1	1546	callose synthase 2-like isoform X2	20.77	1.58	2.98	5.81e-06	0.00235	0.18
29172	XM_021977166.1	LOC110772708	XP_021832858.1	201	early light-induced protein 1, chloroplastic-like	39.7	2.62	6.13	7.81e-05	0.02	1
29174	XM_021977168.1	LOC110772710	XP_021832860.1	189	early light-induced protein 1, chloroplastic-like	27.88	8.36	328.92	5.28e-08	5.38e-05	0.00163
29175	XM_021977162.1	LOC110772705	XP_021832854.1	191	early light-induced protein 1, chloroplastic-like	171.27	5.85	57.81	3e-16	2.45e-12	9.28e-12
29532	XM_021977573.1	LOC110773076	XP_021833265.1	409	pectin acetylesterase 5-like isoform X2	1.99	-5.15	-35.39	5.98e-05	0.01	1
29639	XM_021977700.1	LOC110773195	XP_021833392.1	217	uncharacterized protein LOC110773195	45.7	-1.49	-2.81	0.000329	0.04	1
30562	XM_021978733.1	LOC110774191	XP_021834425.1	672	probable leucine-rich repeat receptor-like serine/threonine-protein kinase At3g14840 isoform X2	13.19	-2.23	-4.7	4.45e-07	0.00033	0.01
30563	XM_021978732.1	LOC110774191	XP_021834424.1	674	probable leucine-rich repeat receptor-like serine/threonine-protein kinase At3g14840 isoform X1	21.91	4.92	30.3	8.1e-07	0.000536	0.03
30605	XM_021978782.1	LOC110774243	XP_021834474.1	269	protein DDB_G0276689-like isoform X1	6.43	-6.08	-67.7	1.25e-05	0.00398	0.39
30898	XM_021979071.1	LOC110774526	XP_021834763.1	2645	golgin subfamily A member 4 isoform X4	3.92	8.87	467.84	0.000148	0.03	1
30944	XM_021979158.1	LOC110774599	XP_021834850.1	1158	TMV resistance protein N-like isoform X3	1.06	-4.62	-24.61	0.000296	0.04	1
31335	XM_021944590.1	LOC110744601	XP_021800282.1	277	xyloglucan endotransglucosylase/hydrolase 2-like	680.85	-1.76	-3.4	5.6e-06	0.00235	0.17
31449	XM_021944717.1	LOC110744731	XP_021800409.1	2334	uncharacterized protein LOC110744731 isoform X2	0.7	5.53	46.17	1.13e-05	0.0037	0.35
31737	XM_021945037.1	LOC110744989	XP_021800729.1	955	plasma membrane ATPase 4 isoform X2	11.98	-1.65	-3.14	3.15e-05	0.0077	0.97
31846	XM_021945153.1	LOC110745078	XP_021800845.1	322	serine/threonine-protein phosphatase PP1 isoform X2	6.4	-4.65	-25.14	2.01e-05	0.00566	0.62
32420	XM_021945801.1	LOC110745682	XP_021801493.1	193	protein EXORDIUM-like 5	2.2	-4.61	-24.45	0.000397	0.05	1
32498	XM_021945898.1	LOC110745762	XP_021801590.1	253	expansin-A8-like	23.41	-4.76	-27.16	1.71e-08	2.2e-05	0.000529
32505	XM_021945896.1	LOC110745760	XP_021801588.1	430	LOW QUALITY PROTEIN: alpha-galactosidase 3	42.64	-1.5	-2.83	0.000291	0.04	1
32550	XM_021945948.1	LOC110745804	XP_021801640.1	946	linoleate 13S-lipoxygenase 2-1, chloroplastic-like	1.03	-5.22	-37.26	0.000163	0.03	1
32673	XM_021946088.1	LOC110745929	XP_021801780.1	556	(-)-alpha-pinene synthase-like	36.6	-3.39	-10.48	2.07e-09	3.62e-06	6.41e-05
34652	XM_021948336.1	LOC110748344	XP_021804028.1	223	transketolase, chloroplastic-like	39.09	10.8	1787.01	1.35e-05	0.00403	0.42
34909	XM_021948625.1	LOC110748673	XP_021804317.1	420	sucrose synthase	14.83	-1.63	-3.1	0.000127	0.02	1

## Sheet: S5_local_11116_b1
Supplementary Table S5. The differentially expressed genes from the local samples of sweet cherry inoculated with Pss strain 11116_b1.
No. protein	Gene	Gene ID (LOC)	Protein ID	Size (aa)	Description	Max group mean	Log₂ fold change	Fold change	P-value	FDR p-value	Bonferroni
822	XM_021953650.1	LOC110752889	XP_021809342.1	663	low affinity sulfate transporter 3	16.64	-2.44	-5.43	6.47e-05	0.02	1
1103	XM_021957531.1	LOC110756135	XP_021813223.1	772	probable galactinol--sucrose galactosyltransferase 5	50.37	1.74	3.34	7.26e-07	0.00084	0.02
1278	XM_021958854.1	LOC110757277	XP_021814546.1	352	mitochondrial phosphate carrier protein 2, mitochondrial isoform X1	12.57	2.38	5.21	8.18e-06	0.00529	0.25
2686	XM_021974229.1	LOC110770140	XP_021829921.1	131	organ-specific protein S2-like	114.3	-1.49	-2.81	0.000109	0.03	1
3834	XM_021948968.1	LOC110748978	XP_021804660.1	379	early nodulin-75-like	49.43	-3.25	-9.51	1.88e-07	0.000344	0.00581
3928	XM_021949070.1	LOC110749052	XP_021804762.1	799	G-type lectin S-receptor-like serine/threonine-protein kinase At4g27290 isoform X2	1.84	-6.58	-95.57	1.7e-05	0.00812	0.53
4425	XM_021949567.1	LOC110749454	XP_021805259.1	987	glutamate receptor 2.8-like	7.71	3.59	12.02	1.35e-07	0.000301	0.00417
5245	XM_021950567.1	LOC110750267	XP_021806259.1	103	late embryogenesis abundant protein Lea5	42.96	-3.01	-8.05	1.08e-06	0.00119	0.03
5527	XM_021950767.1	LOC110750430	XP_021806459.1	424	basic 7S globulin-like	11.59	-6.17	-71.8	1.94e-09	1.06e-05	5.99e-05
5791	XM_021951105.1	LOC110750741	XP_021806797.1	453	CBS domain-containing protein CBSCBSPB3 isoform X2	2.18	5.28	38.79	0.000158	0.04	1
6281	XM_021951650.1	LOC110751220	XP_021807342.1	437	TBC1 domain family member 15-like isoform X2	9.44	2.3	4.93	7.44e-05	0.03	1
6915	XM_021952399.1	LOC110751868	XP_021808091.1	475	probable polygalacturonase	194.59	-1.64	-3.12	1.29e-06	0.00135	0.04
7052	XM_021952486.1	LOC110751928	XP_021808178.1	737	WD and tetratricopeptide repeats protein 1 isoform X3	5.2	-7.85	-230.09	2.27e-06	0.00217	0.07
7082	XM_021952571.1	LOC110751997	XP_021808263.1	443	aspartyl protease AED3	9.53	-2.9	-7.49	7.67e-06	0.00511	0.24
7595	XM_021953131.1	LOC110752466	XP_021808823.1	517	AAA-ATPase ASD, mitochondrial-like	33	2.05	4.14	7.4e-05	0.03	1
8300	XM_021953913.1	LOC110753102	XP_021809605.1	500	geraniol 8-hydroxylase-like	114.62	-2.47	-5.56	4.84e-07	0.000626	0.01
8397	XM_021954079.1	LOC110753224	XP_021809771.1	770	origin of replication complex subunit 1A-like isoform X5	2.72	10.16	1147.33	0.000107	0.03	1
8409	XM_021954085.1	LOC110753229	XP_021809777.1	597	probable carotenoid cleavage dioxygenase 4, chloroplastic	27.59	-2.1	-4.29	6.58e-06	0.00467	0.2
8732	XM_021954348.1	LOC110753438	XP_021810040.1	935	probable pre-mRNA-splicing factor ATP-dependent RNA helicase DEAH5 isoform X1	6.09	7.63	198.65	3.93e-07	0.00054	0.01
9043	XM_021954742.1	LOC110753774	XP_021810434.1	466	uncharacterized protein LOC110753774 isoform X7	8.22	-3.55	-11.7	8.5e-06	0.00534	0.26
9884	XM_021955693.1	LOC110754605	XP_021811385.1	1004	pre-mRNA-processing protein 40C isoform X1	2.43	-3.73	-13.24	2.77e-05	0.01	0.86
10729	XM_021956643.1	LOC110755444	XP_021812335.1	1732	helicase protein MOM1-like isoform X2	1.14	5.22	37.26	2.26e-05	0.01	0.7
12500	XM_021958579.1	LOC110757058	XP_021814271.1	556	(-)-alpha-pinene synthase-like isoform X2	172.1	-2.99	-7.95	8.7e-08	0.000273	0.00269
12501	XM_021958578.1	LOC110757058	XP_021814270.1	557	(-)-alpha-pinene synthase-like isoform X1	19.77	-4.76	-27.16	1.1e-13	2.42e-09	3.4e-09
12610	XM_021958655.1	LOC110757111	XP_021814347.1	624	putative leucine-rich repeat receptor-like serine/threonine-protein kinase At2g14440 isoform X2	5.42	-10.25	-1217.07	5.64e-05	0.02	1
12617	XM_021958739.1	LOC110757178	XP_021814431.1	383	transcription factor HHO3-like	30.3	-1.63	-3.1	0.000122	0.03	1
12658	XM_021958714.1	LOC110757158	XP_021814406.1	579	protein NRT1/ PTR FAMILY 3.1	1.76	-4.11	-17.23	6.61e-05	0.03	1
12701	XM_021958840.1	LOC110757264	XP_021814532.1	968	receptor-like protein kinase HAIKU2 isoform X2	13.91	4.34	20.31	1.76e-06	0.00176	0.05
12923	XM_021959102.1	LOC110757481	XP_021814794.1	745	transcription factor bHLH155 isoform X1	3.39	4.02	16.25	2.5e-05	0.01	0.77
13603	XM_021959805.1	LOC110758022	XP_021815497.1	391	probable serine/threonine-protein kinase At5g41260 isoform X2	5.99	5.26	38.28	9.77e-05	0.03	1
14323	XM_021960625.1	LOC110758710	XP_021816317.1	588	asparagine synthetase glutamine-hydrolyzing	51.77	-4.38	-20.76	1.44e-11	1.05e-07	4.45e-07
14572	XM_021960874.1	LOC110758905	XP_021816566.1	395	alcohol dehydrogenase-like 4	121.45	-1.86	-3.63	1.28e-05	0.00696	0.4
14607	XM_021960910.1	LOC110758931	XP_021816602.1	722	uncharacterized protein LOC110758931 isoform X5	2.58	9.7	829.94	0.000102	0.03	1
14896	XM_021961261.1	LOC110759222	XP_021816953.1	951	formin-like protein 11 isoform X1	2.12	-5.87	-58.48	7.75e-05	0.03	1
15348	XM_021961887.1	LOC110759763	XP_021817579.1	871	uncharacterized protein LOC110759763 isoform X3	1.21	-4.61	-24.45	0.000102	0.03	1
16117	XM_021962602.1	LOC110760354	XP_021818294.1	326	heavy metal-associated isoprenylated plant protein 7-like	4.08	-4	-15.99	4.96e-05	0.02	1
16135	XM_021962599.1	LOC110760351	XP_021818291.1	486	CBS domain-containing protein CBSCBSPB1-like isoform X2	4.01	4.44	21.7	7.91e-05	0.03	1
16360	XM_021962862.1	LOC110760563	XP_021818554.1	447	elongation factor 1-alpha-like	61.55	-2.83	-7.1	8.67e-05	0.03	1
17696	XM_021964392.1	LOC110761814	XP_021820084.1	621	auxin response factor 24-like isoform X3	3.86	4.07	16.85	0.000178	0.05	1
17718	XM_021964438.1	LOC110761855	XP_021820130.1	107	monothiol glutaredoxin-S1-like	13.22	-6.46	-87.76	4.45e-05	0.02	1
17737	XM_021964444.1	LOC110761860	XP_021820136.1	786	potassium transporter 5-like	219.59	1.63	3.1	7.47e-06	0.00511	0.23
17763	XM_021964462.1	LOC110761868	XP_021820154.1	191	translocator protein homolog	28.6	2.96	7.76	4.92e-06	0.00373	0.15
18042	XM_021964733.1	LOC110762128	XP_021820425.1	314	G-box-binding factor 4-like isoform X2	8.13	-4.92	-30.3	5.81e-07	0.000709	0.02
18053	XM_021964760.1	LOC110762153	XP_021820452.1	835	G-type lectin S-receptor-like serine/threonine-protein kinase At1g11410 isoform X2	4.91	3.08	8.48	0.000175	0.05	1
18278	XM_021965044.1	LOC110762407	XP_021820736.1	1208	DNA annealing helicase and endonuclease ZRANB3 isoform X1	4.94	-4.14	-17.69	1.14e-05	0.00658	0.35
18302	XM_021964928.1	LOC110762320	XP_021820620.1	480	UDP-glucose 6-dehydrogenase 5-like	9.47	3.57	11.85	4.94e-05	0.02	1
18417	XM_021965111.1	LOC110762467	XP_021820803.1	1395	uncharacterized protein LOC110762467 isoform X2	1.41	5.12	34.88	0.000168	0.05	1
18565	XM_021965295.1	LOC110762634	XP_021820987.1	301	uncharacterized protein LOC110762634 isoform X2	23.06	2.52	5.75	0.000109	0.03	1
18566	XM_021965294.1	LOC110762634	XP_021820986.1	301	uncharacterized protein LOC110762634 isoform X1	42.19	3.2	9.2	9.93e-08	0.000273	0.00308
19275	XM_021966104.1	LOC110763340	XP_021821796.1	70	18.1 kDa class I heat shock protein-like; frame=3	71.9	-3.12	-8.72	3.22e-06	0.00267	0.1
19376	XM_021966234.1	LOC110763446	XP_021821926.1	768	protein LONGIFOLIA 1	15.22	-3.49	-11.27	1.31e-05	0.00696	0.41
19491	XM_021966359.1	LOC110763562	XP_021822051.1	773	acylamino-acid-releasing enzyme-like isoform X5	1.54	-4.06	-16.67	4.48e-05	0.02	1
19492	XM_021966360.1	LOC110763562	XP_021822052.1	773	acylamino-acid-releasing enzyme-like isoform X5	1.33	-3.93	-15.2	0.000189	0.05	1
19522	XM_021966376.1	LOC110763567	XP_021822068.1	573	protein SIEVE ELEMENT OCCLUSION B-like	130.91	-1.59	-3	1.31e-05	0.00696	0.41
19922	XM_021966833.1	LOC110763937	XP_021822525.1	383	(-)-alpha-pinene synthase-like	537.69	-1.66	-3.15	1.51e-05	0.00768	0.47
20695	XM_021967783.1	LOC110764762	XP_021823475.1	277	expansin-B15-like	20.48	-3.58	-11.97	2.54e-06	0.00223	0.08
21383	XM_021968478.1	LOC110765366	XP_021824170.1	756	putative receptor-like protein kinase At3g47110	2.48	3.83	14.18	8.38e-05	0.03	1
21427	XM_021968494.1	LOC110765377	XP_021824186.1	1061	uncharacterized protein LOC110765377 isoform X2	1.66	-4.3	-19.64	7.54e-05	0.03	1
21458	XM_021968582.1	LOC110765449	XP_021824274.1	514	sulfhydryl oxidase 2 isoform X1	6.69	-4.04	-16.48	9.6e-06	0.0057	0.3
22144	XM_021969305.1	LOC110766051	XP_021824997.1	338	galactinol synthase 2-like	202.42	1.44	2.71	0.000105	0.03	1
22172	XM_021969355.1	LOC110766092	XP_021825047.1	449	lysine histidine transporter 1-like	90.17	1.75	3.36	0.000127	0.04	1
22309	XM_021969502.1	LOC110766214	XP_021825194.1	1981	E3 ubiquitin-protein ligase PRT6 isoform X2	6.28	7.9	238.99	1.77e-12	1.95e-08	5.49e-08
22751	XM_021969938.1	LOC110766584	XP_021825630.1	264	chlorophyll a-b binding protein of LHCII type 1	43.74	-2.15	-4.43	3.28e-06	0.00267	0.1
22780	XM_021970012.1	LOC110766644	XP_021825704.1	103	holotricin-3-like	151.34	-1.94	-3.83	8.76e-06	0.00535	0.27
22911	XM_021970205.1	LOC110766817	XP_021825897.1	293	uncharacterized protein LOC110766817	28.73	-4.02	-16.17	5.17e-09	2.2e-05	0.00016
23339	XM_021970595.1	LOC110767143	XP_021826287.1	350	probable WRKY transcription factor 53	3.88	4.03	16.35	8.96e-05	0.03	1
24194	XM_021971637.1	LOC110767960	XP_021827329.1	1126	DNA repair protein REV1 isoform X4	2.67	-6.61	-97.86	1.33e-05	0.00696	0.41
24199	XM_021971635.1	LOC110767960	XP_021827327.1	1128	DNA repair protein REV1 isoform X3	2.17	8.58	381.9	2.52e-06	0.00223	0.08
24215	XM_021971620.1	LOC110767953	XP_021827312.1	600	probable indole-3-acetic acid-amido synthetase GH3.1	26.73	2.07	4.2	5.69e-06	0.00417	0.18
24961	XM_021972422.1	LOC110768617	XP_021828114.1	513	protease Do-like 10, mitochondrial isoform X2	1.91	-6.02	-64.8	8.54e-05	0.03	1
27985	XM_021975910.1	LOC110771585	XP_021831602.1	729	transmembrane and coiled-coil domain-containing protein 4-like isoform X1	2.24	4.12	17.33	0.000136	0.04	1
29030	XM_021977018.1	LOC110772577	XP_021832710.1	929	serine/threonine-protein kinase CTR1 isoform X2	2.41	7.9	238.29	3.82e-06	0.003	0.12
29140	XM_021977132.1	LOC110772681	XP_021832824.1	237	small heat shock protein, chloroplastic-like	38.06	-2.5	-5.64	0.0001	0.03	1
29162	XM_021977159.1	LOC110772703	XP_021832851.1	243	F-box protein SKIP24 isoform X3	9.32	-4.14	-17.63	6.89e-05	0.03	1
29649	XM_021977705.1	LOC110773200	XP_021833397.1	1173	probable leucine-rich repeat receptor-like protein kinase At1g35710	30.06	2.24	4.72	1.68e-05	0.00812	0.52
30898	XM_021979071.1	LOC110774526	XP_021834763.1	2645	golgin subfamily A member 4 isoform X4	0.72	11.88	3772.32	3.46e-07	0.000506	0.01
31272	XM_021944515.1	LOC110744524	XP_021800207.1	792	probable leucine-rich repeat receptor-like protein kinase At1g35710 isoform X1	18.08	2.26	4.79	1.83e-07	0.000344	0.00567
31280	XM_021944522.1	LOC110744533	XP_021800214.1	102	monothiol glutaredoxin-S2-like	15.58	-5.88	-58.88	2.24e-05	0.01	0.69
31419	XM_021944684.1	LOC110744696	XP_021800376.1	259	bidirectional sugar transporter SWEET1-like	12.09	2.97	7.83	5.78e-05	0.02	1
31958	XM_021945280.1	LOC110745206	XP_021800972.1	560	4-coumarate--CoA ligase-like 9 isoform X1	2.45	6.56	94.6	1.54e-05	0.00768	0.48
32673	XM_021946088.1	LOC110745929	XP_021801780.1	556	(-)-alpha-pinene synthase-like	36.6	-2.88	-7.34	3.13e-07	0.000492	0.0097
32951	XM_021946400.1	LOC110746189	XP_021802092.1	225	protein P21-like	26.96	-4.24	-18.87	6.01e-09	2.2e-05	0.000186
34064	XM_021947671.1	LOC110747510	XP_021803363.1	181	(-)-alpha-pinene synthase-like	406.85	-1.91	-3.77	2.28e-07	0.000386	0.00707
34106	XM_021947717.1	LOC110747565	XP_021803409.1	329	disease resistance protein RPS6-like	112.85	1.44	2.71	0.000157	0.04	1
35004	XM_021948729.1	LOC110748781	XP_021804421.1	1102	putative phospholipid-transporting ATPase 9	4.04	7.32	159.67	1.37e-07	0.000301	0.00425

## Sheet: S6_distal_A1M3
Supplementary Table S6. The differentially expressed genes from the distal samples of sweet cherry inoculated with Pss strain A1M3.
No. protein	Gene	Gene ID (LOC)	Protein ID	Size (aa)	Description	Max group mean	Log₂ fold change	Fold change	P-value	FDR p-value	Bonferroni
225	XM_021958758.1	LOC110757105	XP_021814450.1	1110	zinc transporter 5 isoform X2	12.53	6.2	73.58	3.99e-05	0.00719	1
415	XM_021948911.1	LOC110748926	XP_021804603.1	478	amino acid transporter AVT1H	28.85	6.62	98.56	3.41e-08	8.19e-05	0.00105
533	XM_021950924.1	LOC110750576	XP_021806616.1	453	protein CLT1, chloroplastic-like	22.54	2.27	4.82	5.06e-05	0.00826	1
759	XM_021952979.1	LOC110752344	XP_021808671.1	312	uncharacterized protein LOC110752344	53.65	2.35	5.11	0.000658	0.05	1
773	XM_021953430.1	LOC110752712	XP_021809122.1	350	NAC domain-containing protein 72	449.15	1.64	3.12	1.32e-05	0.0036	0.4
897	XM_021954515.1	LOC110753582	XP_021810207.1	157	probable calcium-binding protein CML29	83.76	4.67	25.38	4.44e-07	0.000454	0.01
961	XM_021955304.1	LOC110754242	XP_021810996.1	741	DNA topoisomerase 3-alpha isoform X3	1.54	5.24	37.81	0.000499	0.04	1
985	XM_021955510.1	LOC110754445	XP_021811202.1	204	glycine-rich protein DC9.1-like isoform X1	20.54	4.31	19.88	0.000227	0.02	1
1310	XM_021958616.1	LOC110757075	XP_021814308.1	513	protein BONZAI 1-like isoform X2	5.11	-5.02	-32.33	2.33e-05	0.00504	0.72
1386	XM_021959303.1	LOC110757620	XP_021814995.1	365	ferredoxin--NADP reductase, leaf isozyme, chloroplastic	313.47	-1.27	-2.41	0.000424	0.03	1
1543	XM_021961857.1	LOC110759741	XP_021817549.1	623	protein NSP-INTERACTING KINASE 1-like	5.74	3.56	11.79	0.000323	0.03	1
1707	XM_021963495.1	LOC110761098	XP_021819187.1	374	B3 domain-containing protein At2g36080-like isoform X2	4.96	5.12	34.89	0.00023	0.02	1
2162	XM_021967669.1	LOC110764655	XP_021823361.1	659	probable leucine-rich repeat receptor-like protein kinase At1g68400	18.19	1.76	3.39	0.000278	0.03	1
2223	XM_021969092.1	LOC110765849	XP_021824784.1	349	mitogen-activated protein kinase kinase kinase 17	52.46	2.17	4.5	0.000172	0.02	1
2244	XM_021969666.1	LOC110766340	XP_021825358.1	298	heat stress transcription factor B-1 isoform X2	41.81	2.06	4.17	7.31e-05	0.01	1
2414	XM_021970894.1	LOC110767366	XP_021826586.1	287	probable aquaporin PIP2-5	516.44	1.17	2.25	0.000519	0.04	1
2522	XM_021972157.1	LOC110768427	XP_021827849.1	286	protein PHLOEM PROTEIN 2-LIKE A1-like	18.35	4.47	22.15	6.95e-05	0.01	1
2523	XM_021972169.1	LOC110768438	XP_021827861.1	184	protein PHLOEM PROTEIN 2-LIKE A9	34.93	4.69	25.88	1.23e-06	0.000809	0.04
2926	XM_021976779.1	LOC110772343	XP_021832471.1	627	9-cis-epoxycarotenoid dioxygenase NCED1, chloroplastic-like	94.78	3.47	11.11	1.17e-13	9.35e-10	3.59e-09
2927	XM_021977429.1	LOC110772934	XP_021833121.1	333	gibberellin 2-beta-dioxygenase 1-like	29.57	3.22	9.34	1.62e-05	0.00418	0.5
3159	XM_021978932.1	LOC110774392	XP_021834624.1	602	pentatricopeptide repeat-containing protein At1g62914, mitochondrial-like isoform X2	1.47	5.75	53.64	0.000349	0.03	1
3220	XM_021944914.1	LOC110744878	XP_021800606.1	1012	probable LRR receptor-like serine/threonine-protein kinase At4g36180	7.09	3.8	13.91	9.4e-06	0.00289	0.29
3400	XM_021946949.1	LOC110746710	XP_021802641.1	324	mitogen-activated protein kinase kinase 9-like	93.23	2.49	5.6	1.23e-05	0.00358	0.38
3505	XM_021945513.1	LOC110745430	XP_021801205.1	547	CDT1-like protein a, chloroplastic	11.93	2.88	7.35	6.69e-05	0.01	1
3782	XM_021948857.1	LOC110748888	XP_021804549.1	370	3-hydroxy-3-methylglutaryl-coenzyme A reductase 2	48.28	1.7	3.26	0.000501	0.04	1
4043	XM_021949322.1	LOC110749251	XP_021805014.1	685	U-box domain-containing protein 34 isoform X2	5.17	6	63.87	3.48e-05	0.00658	1
4168	XM_021949318.1	LOC110749249	XP_021805010.1	215	ethylene-responsive transcription factor ERF017	9.59	2.92	7.55	0.000225	0.02	1
4368	XM_021949524.1	LOC110749414	XP_021805216.1	257	UDP-glucuronic acid decarboxylase 2-like	360.25	6.61	97.87	1.8e-07	0.000216	0.00554
4604	XM_021949664.1	LOC110749549	XP_021805356.1	2059	MAG2-interacting protein 2 isoform X2	5.18	9.94	979.34	8.27e-05	0.01	1
4612	XM_021949811.1	LOC110749659	XP_021805503.1	310	dof zinc finger protein DOF4.6-like	12.48	2.99	7.95	0.000577	0.04	1
4617	XM_021949787.1	LOC110749640	XP_021805479.1	237	thylakoid lumenal 17.4 kDa protein, chloroplastic	40.18	-1.51	-2.85	0.000531	0.04	1
4650	XM_021949844.1	LOC110749688	XP_021805536.1	448	galactomannan galactosyltransferase 1-like	79.14	1.93	3.82	0.000195	0.02	1
4668	XM_021949885.1	LOC110749720	XP_021805577.1	472	multiple inositol polyphosphate phosphatase 1-like isoform X2	39.66	1.24	2.36	0.000594	0.04	1
4786	XM_021949996.1	LOC110749810	XP_021805688.1	296	EID1-like F-box protein 3	155.77	1.57	2.97	6.35e-05	0.00976	1
4876	XM_021950095.1	LOC110749892	XP_021805787.1	917	DNA gyrase subunit A, chloroplastic/mitochondrial isoform X3	5.08	5.33	40.25	8.71e-05	0.01	1
5085	XM_021950332.1	LOC110750069	XP_021806024.1	169	uncharacterized protein LOC110750069	11.29	5.26	38.4	0.000226	0.02	1
5112	XM_021950372.1	LOC110750099	XP_021806064.1	149	photosystem I reaction center subunit IV B, chloroplastic	196.56	-1.52	-2.87	1.76e-05	0.00439	0.54
5246	XM_021950598.1	LOC110750299	XP_021806290.1	419	uncharacterized protein LOC110750299 isoform X2	8.89	6.91	120.51	2.91e-05	0.00586	0.89
5353	XM_021950638.1	LOC110750328	XP_021806330.1	310	NADP-dependent D-sorbitol-6-phosphate dehydrogenase-like	224.46	1.57	2.97	1.3e-05	0.0036	0.4
5484	XM_021950782.1	LOC110750441	XP_021806474.1	440	BSD domain-containing protein 1-like	85.01	2.7	6.48	0.000558	0.04	1
5573	XM_021950855.1	LOC110750518	XP_021806547.1	487	amino acid permease 3-like isoform X2	24.24	4.42	21.42	4.05e-06	0.00173	0.12
5623	XM_021950895.1	LOC110750557	XP_021806587.1	485	IAA-amino acid hydrolase ILR1-like 6	73.64	2	4	2.3e-05	0.00504	0.71
5712	XM_021951000.1	LOC110750640	XP_021806692.1	784	putative DEAD-box ATP-dependent RNA helicase 29 isoform X3	7.95	4.14	17.59	0.000356	0.03	1
5738	XM_021951055.1	LOC110750697	XP_021806747.1	453	tryptophan aminotransferase-related protein 4-like isoform X2	5.48	-7.21	-148.24	8.6e-05	0.01	1
5755	XM_021951084.1	LOC110750715	XP_021806776.1	716	L-type lectin-domain containing receptor kinase VIII.1	13.38	2.08	4.23	4.3e-05	0.00747	1
5865	XM_021951152.1	LOC110750787	XP_021806844.1	505	trans-cinnamate 4-monooxygenase	226.68	1.56	2.95	0.000411	0.03	1
5975	XM_021951256.1	LOC110750878	XP_021806948.1	336	ubiquinol oxidase, mitochondrial-like	32.13	2.24	4.73	0.000192	0.02	1
6002	XM_021951537.1	LOC110751107	XP_021807229.1	653	probable sulfate transporter 3.5	133.82	3.5	11.33	0.000483	0.04	1
6040	XM_021951349.1	LOC110750957	XP_021807041.1	375	transcription factor bHLH68-like	76.83	1.94	3.84	1.02e-05	0.00309	0.31
6093	XM_021951412.1	LOC110750997	XP_021807104.1	1257	putative ABC transporter B family member 8	1.96	2.99	7.96	0.000152	0.02	1
6505	XM_021951900.1	LOC110751428	XP_021807592.1	912	alpha-amylase 3, chloroplastic isoform X1	15.77	2.68	6.41	1.71e-06	0.000962	0.05
6548	XM_021951948.1	LOC110751470	XP_021807640.1	159	MLP-like protein 34	16.23	4.47	22.09	0.000251	0.02	1
6603	XM_021952030.1	LOC110751548	XP_021807722.1	654	probable ADP-ribosylation factor GTPase-activating protein AGD14 isoform X2	2.01	-9.98	-1011.37	0.000253	0.02	1
6614	XM_021952015.1	LOC110751540	XP_021807707.1	216	uncharacterized protein LOC110751540	755.53	4.95	30.83	1.94e-05	0.0046	0.59
6862	XM_021952257.1	LOC110751748	XP_021807949.1	231	probable E3 ubiquitin-protein ligase ZFP1 isoform X5	36.16	10.09	1086.63	8.34e-05	0.01	1
6872	XM_021952367.1	LOC110751837	XP_021808059.1	251	uncharacterized protein LOC110751837	237.09	-1.39	-2.62	0.000234	0.02	1
6887	XM_021952302.1	LOC110751787	XP_021807994.1	148	desiccation protectant protein Lea14 homolog	420.93	1.62	3.07	0.00021	0.02	1
6915	XM_021952399.1	LOC110751868	XP_021808091.1	475	probable polygalacturonase	57.46	-2.04	-4.12	0.00027	0.03	1
7052	XM_021952486.1	LOC110751928	XP_021808178.1	737	WD and tetratricopeptide repeats protein 1 isoform X3	3.43	9.3	630.46	0.000374	0.03	1
7078	XM_021952474.1	LOC110751921	XP_021808166.1	319	mitochondrial uncoupling protein 5-like	169.92	2.36	5.15	0.000317	0.03	1
7109	XM_021952416.1	LOC110751888	XP_021808108.1	445	MADS-box protein JOINTLESS-like isoform X4	380.78	5.66	50.54	8.36e-08	0.000125	0.00257
7199	XM_021952671.1	LOC110752081	XP_021808363.1	1260	zinc finger protein BRUTUS-like At1g18910 isoform X2	7.27	-2.28	-4.87	7.18e-05	0.01	1
7311	XM_021952806.1	LOC110752209	XP_021808498.1	823	G-type lectin S-receptor-like serine/threonine-protein kinase At4g27290 isoform X1	7.08	-4.61	-24.49	2.32e-07	0.000265	0.00712
7352	XM_021952855.1	LOC110752241	XP_021808547.1	286	probable CCR4-associated factor 1 homolog 11	100.01	2.66	6.3	6e-06	0.00224	0.18
7641	XM_021953167.1	LOC110752503	XP_021808859.1	738	serine/arginine repetitive matrix protein 1	40.41	1.92	3.78	0.000129	0.02	1
7672	XM_021953205.1	LOC110752525	XP_021808897.1	454	flavonoid 3-O-glucosyltransferase-like	64.09	2.64	6.24	7.65e-07	0.000611	0.02
7750	XM_021953342.1	LOC110752639	XP_021809034.1	205	uncharacterized protein LOC110752639	303.29	1.62	3.07	0.000699	0.05	1
7769	XM_021953364.1	LOC110752659	XP_021809056.1	203	LOW QUALITY PROTEIN: triphosphate tunel metalloenzyme 3-like	67.44	2.39	5.24	0.000313	0.03	1
7820	XM_021953388.1	LOC110752675	XP_021809080.1	1143	uncharacterized protein LOC110752675 isoform X1	1.68	3.45	10.92	0.000203	0.02	1
7822	XM_021953335.1	LOC110752629	XP_021809027.1	745	probable galactinol--sucrose galactosyltransferase 6 isoform X2	9.95	3.72	13.21	0.00025	0.02	1
7950	XM_021953482.1	LOC110752758	XP_021809174.1	318	dof zinc finger protein DOF2.1	15.61	2.71	6.52	0.000303	0.03	1
8031	XM_021953580.1	LOC110752836	XP_021809272.1	572	rab3 GTPase-activating protein catalytic subunit isoform X3	7.08	9.92	969.47	0.000232	0.02	1
8069	XM_021953631.1	LOC110752873	XP_021809323.1	433	transcription factor bHLH112-like isoform X2	5.47	6.12	69.69	0.000117	0.01	1
8076	XM_021953649.1	LOC110752892	XP_021809341.1	589	(3S,6E)-nerolidol synthase 1-like	57.28	2.35	5.11	2e-06	0.00102	0.06
8123	XM_021953712.1	LOC110752941	XP_021809404.1	548	L-ascorbate oxidase homolog	6.79	5.38	41.75	2.99e-05	0.00596	0.92
8191	XM_021953695.1	LOC110752931	XP_021809387.1	332	oxygen-evolving enhancer protein 1, chloroplastic	493.97	-1.33	-2.52	0.000144	0.02	1
8204	XM_021953743.1	LOC110752959	XP_021809435.1	1270	histone-lysine N-methyltransferase SUVR5 isoform X3	4.88	9.54	742.8	0.000231	0.02	1
8264	XM_021953859.1	LOC110753055	XP_021809551.1	747	subtilisin-like protease SBT1.7	84.37	2.16	4.46	1.98e-06	0.00102	0.06
8414	XM_021954093.1	LOC110753235	XP_021809785.1	686	U-box domain-containing protein 18	30.23	1.99	3.98	3.41e-06	0.0016	0.1
8649	XM_021954275.1	LOC110753376	XP_021809967.1	575	transcription factor BIM1 isoform X4	1.55	4.96	31.13	0.00036	0.03	1
8650	XM_021954276.1	LOC110753376	XP_021809968.1	575	transcription factor BIM1 isoform X4	1.29	4.95	30.84	0.000645	0.04	1
8704	XM_021954347.1	LOC110753437	XP_021810039.1	710	NADPH--cytochrome P450 reductase 2	115.33	1.64	3.11	7.1e-05	0.01	1
8733	XM_021954350.1	LOC110753438	XP_021810042.1	892	probable pre-mRNA-splicing factor ATP-dependent RNA helicase DEAH5 isoform X3	3.1	6.94	123	8.04e-06	0.00264	0.25
8742	XM_021954392.1	LOC110753488	XP_021810084.1	284	probable aquaporin PIP2-5	122.31	3	8.02	1.72e-07	0.000216	0.00527
8888	XM_021954563.1	LOC110753627	XP_021810255.1	672	ABC transporter G family member 14	2.32	5.08	33.83	0.000594	0.04	1
8901	XM_021954628.1	LOC110753685	XP_021810320.1	1104	TMV resistance protein N-like isoform X1	5.04	4.59	24.1	1.41e-05	0.00371	0.43
9004	XM_021954764.1	LOC110753791	XP_021810456.1	615	protein NUCLEAR FUSION DEFECTIVE 4-like	99.82	1.9	3.74	0.000192	0.02	1
9033	XM_021954773.1	LOC110753798	XP_021810465.1	386	glycerate dehydrogenase	251.85	-1.36	-2.56	0.000383	0.03	1
9332	XM_021955193.1	LOC110754155	XP_021810885.1	96	non-specific lipid-transfer protein 2-like	45.46	6	63.81	9.15e-06	0.00285	0.28
9503	XM_021955251.1	LOC110754210	XP_021810943.1	699	geranylgeranyl transferase type-2 subunit alpha 1-like isoform X2	4.77	4.9	29.9	0.000342	0.03	1
9869	XM_021955624.1	LOC110754555	XP_021811316.1	346	gibberellin 2-beta-dioxygenase 8-like	17.22	3.88	14.68	1.32e-06	0.000809	0.04
9879	XM_021955732.1	LOC110754633	XP_021811424.1	341	UPF0496 protein 4-like	26.8	2.49	5.6	0.000686	0.05	1
10134	XM_021955935.1	LOC110754826	XP_021811627.1	669	putative receptor-like protein kinase At4g00960	15.82	-1.67	-3.18	0.000215	0.02	1
10201	XM_021955999.1	LOC110754878	XP_021811691.1	1927	callose synthase 7 isoform X1	5.28	3.27	9.62	0.000346	0.03	1
10530	XM_021956371.1	LOC110755200	XP_021812063.1	410	codeine O-demethylase-like isoform X1	27.14	3.53	11.52	0.000453	0.03	1
10912	XM_021956778.1	LOC110755550	XP_021812470.1	560	KH domain-containing protein HEN4 isoform X2	7.07	13.65	12872.5	4.78e-08	8.19e-05	0.00147
11031	XM_021957065.1	LOC110755785	XP_021812757.1	865	stachyose synthase-like	17.02	1.54	2.9	0.000586	0.04	1
11103	XM_021957057.1	LOC110755777	XP_021812749.1	265	chlorophyll a-b binding protein of LHCII type 1-like	149.33	-1.54	-2.91	4.21e-05	0.00737	1
11146	XM_021957024.1	LOC110755755	XP_021812716.1	293	uncharacterized protein C24B11.05 isoform X1	5.15	6.3	78.74	0.000396	0.03	1
11278	XM_021957277.1	LOC110755950	XP_021812969.1	231	probable carboxylesterase 18; frame=3	27.13	4.32	20.03	3.23e-05	0.0063	0.99
11695	XM_021957676.1	LOC110756268	XP_021813368.1	1111	eIF-2-alpha kinase GCN2 isoform X2	1.69	5.58	47.71	0.00034	0.03	1
11743	XM_021957754.1	LOC110756337	XP_021813446.1	242	uncharacterized protein LOC110756337	13.13	4.83	28.38	0.000278	0.03	1
11784	XM_021957777.1	LOC110756362	XP_021813469.1	313	28 kDa ribonucleoprotein, chloroplastic-like	96.75	-1.57	-2.97	8.31e-05	0.01	1
11806	XM_021957803.1	LOC110756381	XP_021813495.1	1043	exportin-4 isoform X2	2.36	9.13	560.37	0.000558	0.04	1
11868	XM_021957805.1	LOC110756383	XP_021813497.1	552	phospholipase A1-Ibeta2, chloroplastic	50.59	1.69	3.23	5.54e-05	0.00875	1
11889	XM_021957922.1	LOC110756480	XP_021813614.1	281	ethylene-responsive transcription factor 1A	186.36	2.08	4.23	1.78e-05	0.00439	0.55
11992	XM_021958088.1	LOC110756646	XP_021813780.1	426	protein phosphatase 2C 37-like	676.96	1.97	3.91	1.77e-05	0.00439	0.54
12002	XM_021958097.1	LOC110756653	XP_021813789.1	482	ribulose bisphosphate carboxylase/oxygenase activase, chloroplastic isoform X1	241.76	-1.35	-2.54	0.000218	0.02	1
12054	XM_021958156.1	LOC110756701	XP_021813848.1	475	glucan endo-1,3-beta-glucosidase-like	168.31	1.81	3.5	5.18e-05	0.00839	1
12135	XM_021958018.1	LOC110756581	XP_021813710.1	252	aquaporin TIP1-3	13.42	4.54	23.21	6.94e-05	0.01	1
12153	XM_021958158.1	LOC110756703	XP_021813850.1	94	uncharacterized protein LOC110756703	348.59	-1.41	-2.65	0.000187	0.02	1
12296	XM_021958441.1	LOC110756942	XP_021814133.1	1542	probable phosphoinositide phosphatase SAC9 isoform X2	12.26	-6.23	-74.93	0.000145	0.02	1
12456	XM_021958476.1	LOC110756967	XP_021814168.1	404	AFP homolog 2	37.17	2.35	5.1	3.89e-06	0.00173	0.12
12486	XM_021958503.1	LOC110756989	XP_021814195.1	618	probable methionine--tRNA ligase isoform X2	9.91	4.18	18.16	7.94e-07	0.000614	0.02
12500	XM_021958579.1	LOC110757058	XP_021814271.1	556	(-)-alpha-pinene synthase-like isoform X2	116.64	-2.64	-6.22	0.000403	0.03	1
12533	XM_021958612.1	LOC110757080	XP_021814304.1	363	E3 ubiquitin-protein ligase RDUF2	114.77	2.24	4.73	5.21e-06	0.00205	0.16
12661	XM_021958729.1	LOC110757169	XP_021814421.1	199	uncharacterized protein LOC110757169	517.01	2.03	4.08	6.74e-05	0.01	1
12701	XM_021958840.1	LOC110757264	XP_021814532.1	968	receptor-like protein kinase HAIKU2 isoform X2	51.96	1.93	3.8	1.8e-05	0.00439	0.55
12799	XM_021958890.1	LOC110757312	XP_021814582.1	475	BAHD acyltransferase DCR	45.76	3.02	8.14	1.73e-06	0.000962	0.05
12831	XM_021959004.1	LOC110757413	XP_021814696.1	1513	putative ABC transporter C family member 15	9.17	1.8	3.49	0.000157	0.02	1
12866	XM_021958958.1	LOC110757367	XP_021814650.1	474	polygalacturonase inhibitor 1-like	142.42	1.42	2.68	0.000171	0.02	1
12957	XM_021959053.1	LOC110757455	XP_021814745.1	476	patellin-4-like	5	2.54	5.83	0.000368	0.03	1
13067	XM_021959202.1	LOC110757550	XP_021814894.1	262	putative methyltransferase DDB_G0268948	9.21	3.66	12.61	8.01e-06	0.00264	0.25
13115	XM_021959276.1	LOC110757608	XP_021814968.1	479	aspartyl protease family protein 2-like	424.91	2.66	6.33	2.59e-05	0.00544	0.79
13131	XM_021959322.1	LOC110757639	XP_021815014.1	645	transcription factor bHLH13	124.97	1.27	2.42	0.000211	0.02	1
13188	XM_021959259.1	LOC110757600	XP_021814951.1	515	leucine-rich repeat extensin-like protein 3	7.68	6.53	92.67	6.77e-07	0.00056	0.02
13198	XM_021959278.1	LOC110757611	XP_021814970.1	496	transcription factor MYC2	6.32	4.11	17.26	3.46e-05	0.00658	1
13277	XM_021959481.1	LOC110757769	XP_021815173.1	357	S-adenosylmethionine decarboxylase proenzyme	91.22	1.97	3.92	5.47e-06	0.00212	0.17
13304	XM_021959396.1	LOC110757699	XP_021815088.1	828	phosphate transporter PHO1 homolog 1	7.86	4.95	31	5.03e-06	0.00201	0.15
13329	XM_021959497.1	LOC110757779	XP_021815189.1	687	trihelix transcription factor GTL1 isoform X2	11.31	3.78	13.7	0.000635	0.04	1
13484	XM_021959691.1	LOC110757945	XP_021815383.1	240	cysteine-rich repeat secretory protein 38-like	19.54	2.97	7.85	5.01e-06	0.00201	0.15
13529	XM_021959775.1	LOC110758001	XP_021815467.1	351	uncharacterized protein LOC110758001	224.1	1.95	3.86	3.8e-06	0.00173	0.12
13548	XM_021959706.1	LOC110757955	XP_021815398.1	179	F-box protein At1g61340-like	127.59	2.08	4.23	6.36e-06	0.00231	0.2
13553	XM_021959717.1	LOC110757962	XP_021815409.1	568	protein TRANSPORT INHIBITOR RESPONSE 1-like	43.09	1.83	3.56	0.000335	0.03	1
13580	XM_021959783.1	LOC110758010	XP_021815475.1	522	oxalate--CoA ligase	335.87	2.16	4.46	2.89e-05	0.00586	0.89
13581	XM_021959815.1	LOC110758031	XP_021815507.1	986	probable copper-transporting ATPase HMA5	3.32	5.41	42.51	7.14e-05	0.01	1
13629	XM_021959867.1	LOC110758076	XP_021815559.1	289	diacylglycerol kinase theta	8.19	6.97	125.56	2.38e-05	0.00504	0.73
13819	XM_021960058.1	LOC110758253	XP_021815750.1	489	protein JINGUBANG-like	12.83	4.57	23.71	1.08e-09	5.16e-06	3.3e-05
13941	XM_021960149.1	LOC110758321	XP_021815841.1	286	probable WRKY transcription factor 11	80.6	1.55	2.92	0.000408	0.03	1
14043	XM_021960283.1	LOC110758421	XP_021815975.1	1055	putative inactive cadmium/zinc-transporting ATPase HMA3	1.59	4.47	22.17	0.000481	0.04	1
14264	XM_021960648.1	LOC110758731	XP_021816340.1	373	uncharacterized protein LOC110758731	11.09	3.76	13.59	0.000116	0.01	1
14326	XM_021960651.1	LOC110758734	XP_021816343.1	371	probable protein phosphatase 2C 25	115.9	1.75	3.36	0.00015	0.02	1
14579	XM_021960851.1	LOC110758891	XP_021816543.1	124	uncharacterized protein LOC110758891	57.13	2.27	4.82	0.000238	0.02	1
14605	XM_021960908.1	LOC110758931	XP_021816600.1	728	uncharacterized protein LOC110758931 isoform X3	19.24	-2.75	-6.73	3.18e-06	0.00155	0.1
14644	XM_021960994.1	LOC110759000	XP_021816686.1	405	phosphatidylinositol N-acetylglucosaminyltransferase subunit A-like isoform X1	15.07	10.9	1913.58	2.12e-05	0.00479	0.65
14702	XM_021960974.1	LOC110758987	XP_021816666.1	1776	nuclear pore complex protein NUP214 isoform X1	4.72	7.88	235.73	0.000382	0.03	1
15023	XM_021961400.1	LOC110759347	XP_021817092.1	365	E3 ubiquitin-protein ligase At4g11680-like	53.2	1.43	2.7	0.000445	0.03	1
15190	XM_021961601.1	LOC110759528	XP_021817293.1	377	ethylene-responsive transcription factor RAP2-13-like	478.07	2.1	4.29	1.32e-05	0.0036	0.41
15446	XM_021961699.1	LOC110759615	XP_021817391.1	358	uncharacterized protein LOC110759615	99.96	4.35	20.33	1.2e-06	0.000809	0.04
15550	XM_021961995.1	LOC110759858	XP_021817687.1	508	uncharacterized protein LOC110759858	7.01	4.3	19.7	0.000321	0.03	1
15587	XM_021962086.1	LOC110759938	XP_021817778.1	659	probable inactive receptor kinase At2g26730	22.35	2.23	4.71	0.00012	0.02	1
15590	XM_021962027.1	LOC110759886	XP_021817719.1	495	myb family transcription factor EFM	3.82	5.13	35.12	0.00047	0.04	1
15609	XM_021962030.1	LOC110759888	XP_021817722.1	142	uncharacterized protein LOC110759888	90.98	2.22	4.66	0.000323	0.03	1
15747	XM_021962208.1	LOC110760033	XP_021817900.1	370	uncharacterized protein LOC110760033	86.46	2.51	5.68	0.000521	0.04	1
15937	XM_021962403.1	LOC110760179	XP_021818095.1	1132	kinesin-like protein KIN-14F	2.61	4.82	28.26	0.00061	0.04	1
15968	XM_021962437.1	LOC110760206	XP_021818129.1	675	uncharacterized protein LOC110760206	20.63	1.91	3.76	5.05e-05	0.00826	1
16022	XM_021962503.1	LOC110760264	XP_021818195.1	643	cyclic nucleotide-gated ion channel 1-like isoform X1	11.85	5.4	42.11	1.54e-06	0.000923	0.05
16048	XM_021962523.1	LOC110760279	XP_021818215.1	1055	protein GIGANTEA isoform X3	4.71	7.83	228.28	2.36e-08	7.06e-05	0.000723
16054	XM_021962536.1	LOC110760290	XP_021818228.1	369	myb family transcription factor APL isoform X1	5.31	5.35	40.8	8.18e-05	0.01	1
16197	XM_021962702.1	LOC110760438	XP_021818394.1	361	auxin efflux carrier component 5	8.53	4.62	24.6	9.48e-05	0.01	1
16220	XM_021962698.1	LOC110760435	XP_021818390.1	318	uncharacterized protein LOC110760435	16.86	-2.19	-4.55	0.000359	0.03	1
16305	XM_021962790.1	LOC110760509	XP_021818482.1	742	protein SIEVE ELEMENT OCCLUSION A-like	13.88	4.35	20.37	4.72e-06	0.00195	0.14
16306	XM_021962789.1	LOC110760508	XP_021818481.1	841	protein SIEVE ELEMENT OCCLUSION B-like	9	5.02	32.49	1.4e-05	0.00371	0.43
16379	XM_021962892.1	LOC110760590	XP_021818584.1	150	auxin-responsive protein SAUR71-like	76.23	-2.4	-5.28	0.000126	0.02	1
16425	XM_021962954.1	LOC110760655	XP_021818646.1	173	uncharacterized protein LOC110760655	226.46	4.88	29.4	4.9e-09	1.68e-05	0.000151
16521	XM_021963057.1	LOC110760740	XP_021818749.1	1552	myosin-12	2.62	4.52	22.91	3.56e-05	0.00668	1
16726	XM_021963281.1	LOC110760927	XP_021818973.1	341	5-amino-6-(5-phospho-D-ribitylamino)uracil phosphatase, chloroplastic isoform X2	13.46	9.83	907.76	0.00044	0.03	1
16858	XM_021963418.1	LOC110761046	XP_021819110.1	172	photosystem I reaction center subunit N, chloroplastic	117.05	-1.52	-2.87	5.55e-05	0.00875	1
16958	XM_021963532.1	LOC110761130	XP_021819224.1	756	protein ENHANCED DISEASE RESISTANCE 2-like isoform X2	1.55	4.96	31.04	0.000632	0.04	1
17177	XM_021963736.1	LOC110761289	XP_021819428.1	866	aminopeptidase M1-like isoform X2	7.33	10.57	1520.89	5.32e-05	0.00853	1
17300	XM_021963948.1	LOC110761468	XP_021819640.1	229	photosystem I reaction center subunit III, chloroplastic	124.77	-1.63	-3.1	1.29e-05	0.0036	0.4
17418	XM_021964073.1	LOC110761579	XP_021819765.1	576	cysteine-rich receptor-like protein kinase 25 isoform X5	6.91	5.69	51.69	4.49e-05	0.00768	1
17500	XM_021964134.1	LOC110761616	XP_021819826.1	430	zinc finger CCCH domain-containing protein 2-like	42.03	2.42	5.37	5.02e-05	0.00826	1
17629	XM_021964276.1	LOC110761722	XP_021819968.1	146	uncharacterized protein LOC110761722	6.46	4.33	20.05	0.000631	0.04	1
17713	XM_021964348.1	LOC110761788	XP_021820040.1	103	monothiol glutaredoxin-S11-like	63.01	2.91	7.49	0.000462	0.04	1
17763	XM_021964462.1	LOC110761868	XP_021820154.1	191	translocator protein homolog	109.31	2.36	5.13	0.000182	0.02	1
17825	XM_021964521.1	LOC110761939	XP_021820213.1	90	uncharacterized protein LOC110761939	850.09	2.2	4.6	2.38e-05	0.00504	0.73
17826	XM_021964522.1	LOC110761940	XP_021820214.1	326	probable isoaspartyl peptidase/L-asparaginase 2	1151.86	2.3	4.92	7.42e-06	0.00257	0.23
17848	XM_021964491.1	LOC110761906	XP_021820183.1	242	WUSCHEL-related homeobox 4-like	9.99	4.47	22.24	0.000696	0.05	1
17943	XM_021964636.1	LOC110762042	XP_021820328.1	267	uncharacterized protein LOC110762042	49.26	2.69	6.45	4.45e-08	8.19e-05	0.00137
17944	XM_021964645.1	LOC110762051	XP_021820337.1	213	photosystem I reaction center subunit II, chloroplastic-like	171.23	-1.21	-2.32	0.000458	0.04	1
18013	XM_021964720.1	LOC110762114	XP_021820412.1	788	TMV resistance protein N-like isoform X2	3.01	-4.16	-17.88	0.000383	0.03	1
18224	XM_021964863.1	LOC110762258	XP_021820555.1	281	thioredoxin-like 1-2, chloroplastic	25.53	-2.17	-4.49	0.000622	0.04	1
18346	XM_021965083.1	LOC110762448	XP_021820775.1	850	putative SWI/SNF-related matrix-associated actin-dependent regulator of chromatin subfamily A member 3-like 1 isoform X2	8.39	10.37	1322.73	2.37e-05	0.00504	0.73
18562	XM_021965255.1	LOC110762606	XP_021820947.1	522	allene oxide synthase 1, chloroplastic	210.14	2.17	4.51	0.000422	0.03	1
18565	XM_021965295.1	LOC110762634	XP_021820987.1	301	uncharacterized protein LOC110762634 isoform X2	11.42	3.09	8.53	0.000576	0.04	1
18566	XM_021965294.1	LOC110762634	XP_021820986.1	301	uncharacterized protein LOC110762634 isoform X1	24.63	3.5	11.33	1.28e-06	0.000809	0.04
18583	XM_021965303.1	LOC110762641	XP_021820995.1	524	protein DA1-like isoform X2	5.62	10.58	1525.77	6.65e-05	0.01	1
18738	XM_021965520.1	LOC110762826	XP_021821212.1	513	cytochrome P450 71A25-like	15.82	-2.24	-4.72	1.93e-05	0.0046	0.59
18849	XM_021965622.1	LOC110762902	XP_021821314.1	286	F-box protein PP2-B15-like	7.04	3.88	14.69	0.000236	0.02	1
18959	XM_021965867.1	LOC110763111	XP_021821559.1	454	mitogen-activated protein kinase kinase kinase 18-like	13.37	3.03	8.19	0.000578	0.04	1
19034	XM_021965860.1	LOC110763106	XP_021821552.1	394	glucose-6-phosphate/phosphate translocator 2, chloroplastic	303.89	2.15	4.45	3.26e-09	1.3e-05	0.0001
19036	XM_021965799.1	LOC110763061	XP_021821491.1	835	polyadenylation and cleavage factor homolog 4 isoform X2	6.18	3.15	8.86	0.00054	0.04	1
19042	XM_021965769.1	LOC110763038	XP_021821461.1	556	pectinesterase	22.71	4.79	27.6	4.21e-08	8.19e-05	0.00129
19180	XM_021966022.1	LOC110763271	XP_021821714.1	229	ethylene-responsive transcription factor 4	461.84	3.06	8.34	4.1e-05	0.00722	1
19520	XM_021966399.1	LOC110763584	XP_021822091.1	678	protein SIEVE ELEMENT OCCLUSION B-like isoform X2	18.61	3.73	13.28	6.53e-05	0.0099	1
19617	XM_021966494.1	LOC110763662	XP_021822186.1	402	magnesium-protoporphyrin IX monomethyl ester oxidative; cyclase, chloroplastic isoform X2	43.44	11.03	2090.92	1.15e-05	0.00339	0.35
19709	XM_021966620.1	LOC110763769	XP_021822312.1	344	DEAD-box ATP-dependent RNA helicase 56 isoform X2	14.8	9.46	706.33	0.000251	0.02	1
19838	XM_021966734.1	LOC110763854	XP_021822426.1	153	protein PHLOEM PROTEIN 2-LIKE A1-like	138.8	4.96	31.18	4.46e-08	8.19e-05	0.00137
19842	XM_021966735.1	LOC110763855	XP_021822427.1	215	protein PHLOEM PROTEIN 2-LIKE A1-like	58.03	3.98	15.73	2.78e-05	0.00573	0.85
19897	XM_021966815.1	LOC110763916	XP_021822507.1	890	calmodulin-binding transcription activator 5 isoform X3	8.34	10.14	1128.58	6.05e-05	0.00949	1
19913	XM_021966811.1	LOC110763915	XP_021822503.1	175	RNA-binding protein FUS-like	13.68	3.94	15.36	0.000454	0.03	1
19922	XM_021966833.1	LOC110763937	XP_021822525.1	383	(-)-alpha-pinene synthase-like	311.38	-2.13	-4.39	3.31e-06	0.00159	0.1
20015	XM_021966973.1	LOC110764063	XP_021822665.1	769	protein LHY isoform X1	42.35	3.29	9.78	2.02e-18	4.84e-14	6.2e-14
20016	XM_021966974.1	LOC110764063	XP_021822666.1	769	protein LHY isoform X1	40.97	3.09	8.53	4.47e-15	5.36e-11	1.37e-10
20057	XM_021967057.1	LOC110764133	XP_021822749.1	450	zinc finger protein CONSTANS-LIKE 6-like	37.26	-2.82	-7.07	1.67e-06	0.000962	0.05
20119	XM_021967059.1	LOC110764138	XP_021822751.1	653	dynamin-related protein 4C-like isoform X1	8.5	4.46	21.97	3.87e-05	0.00703	1
20120	XM_021967060.1	LOC110764138	XP_021822752.1	635	dynamin-related protein 4C-like isoform X2	3.99	4.35	20.43	0.000418	0.03	1
20121	XM_021967058.1	LOC110764137	XP_021822750.1	635	dynamin-related protein 4C-like	11.1	4.91	30.05	1.46e-07	0.000203	0.00447
20249	XM_021967185.1	LOC110764258	XP_021822877.1	469	mitogen-activated protein kinase kinase kinase 18-like	13.38	3.43	10.81	6.73e-07	0.00056	0.02
20305	XM_021967267.1	LOC110764326	XP_021822959.1	537	DEAD-box ATP-dependent RNA helicase 41 isoform X3	4.26	9.22	595.17	0.000605	0.04	1
20376	XM_021967290.1	LOC110764344	XP_021822982.1	237	NAC domain-containing protein 41	24.02	2.71	6.56	9.03e-06	0.00285	0.28
20475	XM_021967454.1	LOC110764468	XP_021823146.1	579	2-hydroxyacyl-CoA lyase	70	1.39	2.63	0.000206	0.02	1
20600	XM_021967596.1	LOC110764596	XP_021823288.1	233	uncharacterized protein LOC110764596	28.72	4.07	16.77	0.000399	0.03	1
20787	XM_021967798.1	LOC110764776	XP_021823490.1	487	uncharacterized protein LOC110764776	12.23	2.47	5.53	0.000737	0.05	1
20913	XM_021967936.1	LOC110764890	XP_021823628.1	142	light-regulated protein	169.51	-1.56	-2.96	0.000114	0.01	1
20924	XM_021967943.1	LOC110764898	XP_021823635.1	2685	uncharacterized protein LOC110764898	2.71	2.84	7.16	0.000276	0.03	1
21106	XM_021968143.1	LOC110765091	XP_021823835.1	842	sucrose synthase 7-like isoform X1	2.5	7.98	251.62	2.19e-05	0.0049	0.67
21145	XM_021968204.1	LOC110765129	XP_021823896.1	148	14 kDa proline-rich protein DC2.15-like	57.05	1.86	3.62	0.00043	0.03	1
21154	XM_021968247.1	LOC110765175	XP_021823939.1	416	uncharacterized protein At4g06744-like	17.76	5	32.05	6.1e-05	0.00949	1
21186	XM_021968249.1	LOC110765180	XP_021823941.1	393	WAT1-related protein At5g07050	20.54	4.77	27.28	4.7e-06	0.00195	0.14
21269	XM_021968346.1	LOC110765262	XP_021824038.1	1005	probable leucine-rich repeat receptor-like serine/threonine-protein kinase At3g14840	85.97	-1.46	-2.75	7.9e-05	0.01	1
21424	XM_021968613.1	LOC110765476	XP_021824305.1	184	E3 ubiquitin-protein ligase RHA2A-like	519.29	2.48	5.58	0.000284	0.03	1
21580	XM_021968693.1	LOC110765556	XP_021824385.1	433	arogenate dehydratase/prephenate dehydratase 6, chloroplastic-like	92.77	2.63	6.18	6.48e-05	0.0099	1
21880	XM_021968782.1	LOC110765619	XP_021824474.1	734	ferric reduction oxidase 7, chloroplastic-like	21.39	-1.44	-2.71	6.81e-05	0.01	1
21981	XM_021969097.1	LOC110765854	XP_021824789.1	292	UDP-xylose transporter 2-like isoform X2	12.99	5.47	44.19	1.53e-07	0.000203	0.00469
22008	XM_021969161.1	LOC110765918	XP_021824853.1	264	oxygen-evolving enhancer protein 2, chloroplastic	483.56	-1.25	-2.38	0.000267	0.03	1
22143	XM_021969316.1	LOC110766061	XP_021825008.1	383	chloroplast stem-loop binding protein of 41 kDa b, chloroplastic isoform X1	188.72	-1.24	-2.36	0.000383	0.03	1
22272	XM_021969486.1	LOC110766201	XP_021825178.1	489	probable cation transporter HKT6	5.1	4.02	16.19	0.000127	0.02	1
22332	XM_021969530.1	LOC110766237	XP_021825222.1	1241	uncharacterized protein LOC110766237 isoform X1	1.75	-6.74	-106.94	1.27e-05	0.0036	0.39
22378	XM_021969581.1	LOC110766284	XP_021825273.1	292	histone chaperone RTT106-like isoform X2	21.78	9.7	831.57	0.000164	0.02	1
22430	XM_021969627.1	LOC110766324	XP_021825319.1	904	E3 ubiquitin-protein ligase HOS1 isoform X2	3.45	5.35	40.91	4.48e-07	0.000454	0.01
22498	XM_021969761.1	LOC110766431	XP_021825453.1	2140	histone-lysine N-methyltransferase ASHH2 isoform X2	6.71	11.47	2837.6	8.88e-06	0.00284	0.27
22515	XM_021969769.1	LOC110766437	XP_021825461.1	231	BTB/POZ domain-containing protein At4g08455-like	63.9	1.74	3.34	0.000239	0.02	1
22607	XM_021969849.1	LOC110766509	XP_021825541.1	361	probable E3 ubiquitin-protein ligase RHC2A	54.33	2.28	4.86	0.000653	0.05	1
22712	XM_021969972.1	LOC110766609	XP_021825664.1	988	phytochrome E isoform X3	1.55	-3.93	-15.25	0.000493	0.04	1
22759	XM_021970028.1	LOC110766659	XP_021825720.1	365	indole-3-acetate O-methyltransferase 1-like isoform X2	9.3	5.44	43.42	1.71e-05	0.00436	0.53
22772	XM_021970007.1	LOC110766639	XP_021825699.1	149	serine/threonine-protein phosphatase PP-X isozyme 2 isoform X2	13.68	7.88	235.95	0.000276	0.03	1
22804	XM_021970040.1	LOC110766675	XP_021825732.1	259	bidirectional sugar transporter SWEET4-like	43.44	3.81	14.05	0.000125	0.02	1
22879	XM_021970208.1	LOC110766819	XP_021825900.1	495	putative nuclear RNA export factor SDE5 isoform X2	3.74	5.06	33.25	0.00031	0.03	1
22951	XM_021970175.1	LOC110766795	XP_021825867.1	264	ethylene-responsive transcription factor 4	274.33	1.67	3.17	0.000156	0.02	1
22955	XM_021970219.1	LOC110766826	XP_021825911.1	295	uncharacterized protein LOC110766826 isoform X1	12.12	4.48	22.32	0.000318	0.03	1
23023	XM_021970354.1	LOC110766933	XP_021826046.1	711	U-box domain-containing protein 19-like	61.06	1.75	3.37	2.06e-05	0.00471	0.63
23062	XM_021970304.1	LOC110766898	XP_021825996.1	716	probable boron transporter 2	7.07	2.61	6.12	0.00049	0.04	1
23063	XM_021970305.1	LOC110766898	XP_021825997.1	716	probable boron transporter 2	6.65	2.65	6.3	0.000643	0.04	1
23082	XM_021970332.1	LOC110766917	XP_021826024.1	353	homeobox protein knotted-1-like 2	14.94	3.19	9.12	0.000621	0.04	1
23170	XM_021970484.1	LOC110767056	XP_021826176.1	330	carboxymethylenebutenolidase homolog	39.87	-1.62	-3.07	0.000248	0.02	1
23185	XM_021970436.1	LOC110767017	XP_021826128.1	786	serine/threonine-protein kinase-like protein CCR4	8.82	2.46	5.5	9.65e-05	0.01	1
23370	XM_021970692.1	LOC110767216	XP_021826384.1	533	uncharacterized protein LOC110767216	3.26	3.18	9.06	0.000108	0.01	1
23405	XM_021970724.1	LOC110767242	XP_021826416.1	219	protein MODIFIER OF SNC1 11 isoform X2	59.5	3.6	12.12	4.46e-05	0.00768	1
23439	XM_021970786.1	LOC110767284	XP_021826478.1	413	uncharacterized protein LOC110767284	2.99	5.01	32.21	0.00067	0.05	1
23440	XM_021970759.1	LOC110767265	XP_021826451.1	618	uncharacterized protein LOC110767265 isoform X1	2.48	6.71	105.04	0.000306	0.03	1
23688	XM_021971038.1	LOC110767486	XP_021826730.1	704	ABC transporter G family member 11-like	110.03	2.64	6.23	4.44e-08	8.19e-05	0.00136
23737	XM_021971126.1	LOC110767550	XP_021826818.1	164	photosystem I reaction center subunit V, chloroplastic	70.7	-1.91	-3.75	4.82e-05	0.00808	1
23740	XM_021971089.1	LOC110767523	XP_021826781.1	473	actin-related protein 8 isoform X2	5.38	5.45	43.68	2.04e-05	0.0047	0.63
23785	XM_021971345.1	LOC110767715	XP_021827037.1	483	xyloglucan galactosyltransferase XLT2	114.29	2.13	4.36	3.2e-05	0.00629	0.98
23797	XM_021971283.1	LOC110767674	XP_021826975.1	646	receptor-like serine/threonine-protein kinase At4g25390	18.25	2.36	5.14	7.13e-06	0.00251	0.22
23841	XM_021971179.1	LOC110767596	XP_021826871.1	234	dehydration-responsive element-binding protein 1A-like	36.19	2.54	5.81	2.37e-05	0.00504	0.73
23854	XM_021971408.1	LOC110767762	XP_021827100.1	562	protein DETOXIFICATION 49	31.32	2.36	5.14	0.000161	0.02	1
23949	XM_021971221.1	LOC110767632	XP_021826913.1	310	probable prolyl 4-hydroxylase 12 isoform X2	4.58	5.22	37.39	0.000151	0.02	1
24040	XM_021971224.1	LOC110767634	XP_021826916.1	863	G-type lectin S-receptor-like serine/threonine-protein kinase At5g24080	18.37	2.63	6.21	0.000335	0.03	1
24060	XM_021971176.1	LOC110767592	XP_021826868.1	1478	ABC transporter C family member 10-like	22.59	1.42	2.68	0.000384	0.03	1
24563	XM_021972019.1	LOC110768307	XP_021827711.1	561	(-)-alpha-pinene synthase-like isoform X1	120.05	-2.04	-4.11	4.09e-05	0.00722	1
24564	XM_021972020.1	LOC110768307	XP_021827712.1	561	(-)-alpha-pinene synthase-like isoform X2	118.73	-2.05	-4.14	4.82e-05	0.00808	1
24602	XM_021972037.1	LOC110768323	XP_021827729.1	463	ethylene-responsive transcription factor ERF054-like	42.55	3.45	10.95	1.04e-10	6.22e-07	3.18e-06
24715	XM_021972193.1	LOC110768461	XP_021827885.1	428	protein LATERAL ROOT PRIMORDIUM 1	17.73	2.46	5.52	0.000655	0.05	1
25132	XM_021972656.1	LOC110768801	XP_021828348.1	165	glycine cleavage system H protein 3, mitochondrial	237.03	-1.49	-2.82	3.1e-05	0.00614	0.95
25175	XM_021972707.1	LOC110768844	XP_021828399.1	869	DUF724 domain-containing protein 3-like isoform X2	4.01	5.54	46.55	4.54e-05	0.00772	1
25545	XM_021973109.1	LOC110769177	XP_021828801.1	667	protein RRP6-like 2 isoform X3	18.53	10.61	1563.74	7.97e-06	0.00264	0.24
25699	XM_021973298.1	LOC110769349	XP_021828990.1	239	peroxygenase-like	125.4	2.81	7.04	1.94e-06	0.00102	0.06
25736	XM_021973303.1	LOC110769354	XP_021828995.1	224	protein LURP-one-related 8	109.92	3	8.03	5.16e-08	8.24e-05	0.00158
25770	XM_021973361.1	LOC110769398	XP_021829053.1	914	replication factor C subunit 1 isoform X5	13.59	4.4	21.12	6.74e-07	0.00056	0.02
25773	XM_021973364.1	LOC110769402	XP_021829056.1	323	mitochondrial uncoupling protein 4-like	16.45	2.86	7.24	3.4e-05	0.00651	1
25861	XM_021973548.1	LOC110769546	XP_021829240.1	315	mitochondrial arginine transporter BAC2-like	31.32	2.29	4.89	6.25e-05	0.00967	1
25891	XM_021973494.1	LOC110769508	XP_021829186.1	144	photosystem I reaction center subunit VI, chloroplastic-like	196.84	-1.34	-2.54	0.00012	0.02	1
26007	XM_021973627.1	LOC110769609	XP_021829319.1	530	F-box/LRR-repeat protein 14 isoform X2	8.2	6.83	113.72	1.3e-06	0.000809	0.04
26038	XM_021973648.1	LOC110769625	XP_021829340.1	164	calcium-binding mitochondrial carrier protein SCaMC-1-like	16.31	4.88	29.44	0.000605	0.04	1
26159	XM_021973806.1	LOC110769771	XP_021829498.1	427	phospholipase A(1) LCAT3 isoform X2	8.42	9.07	538.19	0.000496	0.04	1
26192	XM_021973823.1	LOC110769786	XP_021829515.1	1017	leucine-rich repeat receptor-like serine/threonine-protein kinase BAM1	20.27	1.78	3.42	8.92e-05	0.01	1
26234	XM_021973867.1	LOC110769827	XP_021829559.1	589	protein NRT1/ PTR FAMILY 5.6	18.11	4.05	16.59	1.27e-05	0.0036	0.39
26259	XM_021973956.1	LOC110769899	XP_021829648.1	301	inositol oxygenase 1-like	57.34	1.54	2.92	0.000268	0.03	1
26278	XM_021973970.1	LOC110769916	XP_021829662.1	179	jacalin-related lectin 19	52.47	4.69	25.88	1.78e-06	0.000969	0.05
26367	XM_021973997.1	LOC110769940	XP_021829689.1	557	ankyrin repeat-containing protein NPR4-like isoform X3	2.77	-10.03	-1044.96	0.000398	0.03	1
26392	XM_021974049.1	LOC110769981	XP_021829741.1	327	transcription factor MYB44-like	226.09	2.01	4.02	5.34e-05	0.00853	1
26396	XM_021974065.1	LOC110769992	XP_021829757.1	181	ADP-ribosylation factor 1-like isoform X2	17.46	3.99	15.94	0.000222	0.02	1
26647	XM_021974345.1	LOC110770248	XP_021830037.1	227	probable calcium-binding protein CML36	655.48	2.64	6.24	0.000429	0.03	1
26709	XM_021974407.1	LOC110770296	XP_021830099.1	186	arabinogalactan protein 1-like	37.83	5.6	48.64	6.06e-06	0.00224	0.19
27003	XM_021974777.1	LOC110770603	XP_021830469.1	487	probable L-cysteine desulfhydrase, chloroplastic	12.38	2.79	6.93	0.000211	0.02	1
27448	XM_021975232.1	LOC110771007	XP_021830924.1	448	U-box domain-containing protein 21	20.64	1.91	3.77	0.000656	0.05	1
27536	XM_021975323.1	LOC110771084	XP_021831015.1	953	auxin response factor 5 isoform X1	6.87	4.35	20.4	0.0002	0.02	1
27707	XM_021975517.1	LOC110771252	XP_021831209.1	976	LOW QUALITY PROTEIN: receptor protein kinase CLAVATA1	8.15	2.81	6.99	0.000544	0.04	1
27868	XM_021975701.1	LOC110771401	XP_021831393.1	1431	pleiotropic drug resistance protein 1-like	2.71	4.55	23.4	0.000171	0.02	1
27873	XM_021975698.1	LOC110771399	XP_021831390.1	1109	pleiotropic drug resistance protein 1-like isoform X2	35.51	1.81	3.51	0.000167	0.02	1
27949	XM_021975801.1	LOC110771494	XP_021831493.1	682	peroxisomal acyl-coenzyme A oxidase 1-like	4.72	3.39	10.47	3.3e-05	0.00638	1
28013	XM_021975832.1	LOC110771522	XP_021831524.1	621	jacalin-related lectin 3	8.25	4.48	22.29	4.05e-05	0.00722	1
28139	XM_021976024.1	LOC110771680	XP_021831716.1	189	uncharacterized protein LOC110771680	484.51	-1.43	-2.7	2.74e-05	0.00572	0.84
28360	XM_021976251.1	LOC110771888	XP_021831943.1	758	scarecrow-like protein 22 isoform X2	18.5	10.75	1727.91	1.99e-05	0.00464	0.61
28473	XM_021976373.1	LOC110772010	XP_021832065.1	171	protein CURVATURE THYLAKOID 1B, chloroplastic-like	81.47	-1.95	-3.87	3.74e-05	0.0069	1
28845	XM_021976797.1	LOC110772360	XP_021832489.1	169	auxin-responsive protein IAA9-like	31.65	9.62	789.57	0.000164	0.02	1
28954	XM_021976920.1	LOC110772480	XP_021832612.1	281	zinc finger protein ZAT10-like	124.45	2.4	5.26	3.64e-05	0.00676	1
28982	XM_021976994.1	LOC110772557	XP_021832686.1	279	ethylene-responsive transcription factor ERF109-like	6.83	2.48	5.58	7.13e-05	0.01	1
29027	XM_021977014.1	LOC110772574	XP_021832706.1	2941	BEACH domain-containing protein B isoform X3	5.45	11.2	2347.77	8.31e-06	0.00269	0.26
29122	XM_021977130.1	LOC110772677	XP_021832822.1	1515	putative ABC transporter C family member 15	22.53	2.22	4.65	6.54e-07	0.00056	0.02
29129	XM_021977140.1	LOC110772690	XP_021832832.1	442	vinorine synthase-like	9.06	3.75	13.48	0.000291	0.03	1
29175	XM_021977162.1	LOC110772705	XP_021832854.1	191	early light-induced protein 1, chloroplastic-like	56.82	2.98	7.9	6.54e-07	0.00056	0.02
29177	XM_021977174.1	LOC110772715	XP_021832866.1	198	early light-induced protein 1, chloroplastic-like	51.49	2.74	6.69	2.3e-06	0.00115	0.07
29258	XM_021977264.1	LOC110772794	XP_021832956.1	869	probable leucine-rich repeat receptor-like protein kinase At1g35710	4.44	5.08	33.94	8.4e-05	0.01	1
29304	XM_021977323.1	LOC110772844	XP_021833015.1	290	probable aquaporin PIP1-4	508.77	1.76	3.39	1.39e-05	0.00371	0.43
29311	XM_021977312.1	LOC110772833	XP_021833004.1	556	uncharacterized protein LOC110772833	16.21	1.5	2.83	0.00037	0.03	1
29346	XM_021977357.1	LOC110772875	XP_021833049.1	130	thioredoxin H2-like isoform X2	9.07	6.13	69.84	0.000305	0.03	1
29505	XM_021977557.1	LOC110773054	XP_021833249.1	384	disease resistance protein TAO1-like isoform X4	29.01	10.44	1389.78	3.8e-05	0.00695	1
29718	XM_021977782.1	LOC110773275	XP_021833474.1	547	uncharacterized protein LOC110773275	17.64	2.16	4.47	6.6e-06	0.00236	0.2
29732	XM_021977826.1	LOC110773318	XP_021833518.1	395	protochlorophyllide reductase, chloroplastic	371.67	-1.37	-2.58	6.79e-05	0.01	1
29867	XM_021977963.1	LOC110773437	XP_021833655.1	390	stearoyl-acyl-carrier-protein; 9-desaturase 6, chloroplastic isoform X2	8.12	4.4	21.12	5.03e-05	0.00826	1
29868	XM_021977962.1	LOC110773437	XP_021833654.1	399	stearoyl-acyl-carrier-protein; 9-desaturase 6, chloroplastic isoform X1	57.82	1.56	2.96	0.000277	0.03	1
29870	XM_021977944.1	LOC110773423	XP_021833636.1	359	alcohol dehydrogenase 1-like isoform X2	28.37	10.84	1838.38	1.97e-05	0.00464	0.61
29872	XM_021977942.1	LOC110773422	XP_021833634.1	379	alcohol dehydrogenase 1-like	4.41	6.42	85.88	0.000318	0.03	1
29903	XM_021977988.1	LOC110773467	XP_021833680.1	401	probable protein phosphatase 2C 24	214.03	2.57	5.94	3.99e-06	0.00173	0.12
30054	XM_021978163.1	LOC110773632	XP_021833855.1	728	uncharacterized protein LOC110773632 isoform X2	5.49	3.63	12.39	0.000397	0.03	1
30063	XM_021978174.1	LOC110773650	XP_021833866.1	413	RING-H2 finger protein ATL65	60.21	3	8.01	2.91e-05	0.00586	0.89
30195	XM_021978326.1	LOC110773806	XP_021834018.1	933	uncharacterized protein LOC110773806 isoform X1	62.66	1.58	2.98	0.000248	0.02	1
30215	XM_021978340.1	LOC110773820	XP_021834032.1	436	uncharacterized protein LOC110773820 isoform X2	4.22	6.07	67.07	0.0002	0.02	1
30324	XM_021978466.1	LOC110773955	XP_021834158.1	379	protein trichome birefringence-like 36 isoform X1	8.54	5.49	45	0.000287	0.03	1
30425	XM_021978522.1	LOC110774004	XP_021834214.1	332	WD repeat-containing protein 70-like	30.84	5.82	56.56	8.98e-07	0.000652	0.03
30445	XM_021978495.1	LOC110773980	XP_021834187.1	305	uncharacterized protein ycf23-like	115.38	-1.54	-2.91	0.000138	0.02	1
30566	XM_021978747.1	LOC110774202	XP_021834439.1	858	DExH-box ATP-dependent RNA helicase DExH1 isoform X2	1.5	9.04	526.45	0.000244	0.02	1
30597	XM_021978774.1	LOC110774236	XP_021834466.1	1449	uncharacterized protein LOC110774236 isoform X2	1.97	-5.36	-41.18	0.000136	0.02	1
30899	XM_021979072.1	LOC110774526	XP_021834764.1	2619	golgin subfamily A member 4 isoform X5	10.39	10.9	1915.16	7.52e-06	0.00257	0.23
30900	XM_021979073.1	LOC110774527	XP_021834765.1	411	probable sarcosine oxidase	12.9	3.77	13.67	3.95e-06	0.00173	0.12
31003	XM_021944212.1	LOC110744247	XP_021799904.1	218	E3 ubiquitin-protein ligase RNF126-like	9.35	4.84	28.6	0.000116	0.01	1
31654	XM_021944937.1	LOC110744902	XP_021800629.1	173	uncharacterized protein LOC110744902	65.35	2.55	5.86	0.000192	0.02	1
31814	XM_021945124.1	LOC110745058	XP_021800816.1	181	uncharacterized protein LOC110745058	458.5	2.39	5.23	0.000269	0.03	1
32122	XM_021945457.1	LOC110745380	XP_021801149.1	597	protein NRT1/ PTR FAMILY 7.3	6.92	5.26	38.44	5.8e-06	0.00221	0.18
32420	XM_021945801.1	LOC110745682	XP_021801493.1	193	protein EXORDIUM-like 5	66.31	13.78	14104.8	8.67e-07	0.00065	0.03
32601	XM_021946009.1	LOC110745861	XP_021801701.1	516	cytochrome P450 71A1-like	244.61	1.52	2.87	0.000377	0.03	1
32725	XM_021946146.1	LOC110745967	XP_021801838.1	411	U-box domain-containing protein 28	16.04	2.4	5.29	0.000192	0.02	1
32967	XM_021946418.1	LOC110746208	XP_021802110.1	690	transcription factor MYC2	549.67	1.85	3.6	0.000134	0.02	1
33104	XM_021946567.1	LOC110746350	XP_021802259.1	864	ATP-dependent zinc metalloprotease FTSH 12, chloroplastic isoform X3	3.33	9.12	556.64	0.000491	0.04	1
33225	XM_021946695.1	LOC110746470	XP_021802387.1	2031	nuclear-pore anchor isoform X2	18.25	3.03	8.19	7e-05	0.01	1
33303	XM_021946797.1	LOC110746572	XP_021802489.1	490	G-type lectin S-receptor-like serine/threonine-protein kinase CES101	6.59	-2.49	-5.61	0.000181	0.02	1
33360	XM_021946879.1	LOC110746645	XP_021802571.1	912	large proline-rich protein BAG6 isoform X5	1.82	-6.19	-73.13	0.000292	0.03	1
33563	XM_021947098.1	LOC110746870	XP_021802790.1	490	probable xyloglucan galactosyltransferase GT17	7.7	2.94	7.66	0.000191	0.02	1
33761	XM_021947324.1	LOC110747116	XP_021803016.1	424	APO protein 3, mitochondrial isoform X3	5.48	5.83	56.82	0.000237	0.02	1
33775	XM_021947341.1	LOC110747143	XP_021803033.1	448	UPF0481 protein At3g47200-like	35.95	2.44	5.43	1.57e-05	0.00408	0.48
34022	XM_021947625.1	LOC110747454	XP_021803317.1	210	p21-activated protein kinase-interacting protein 1-like	27.87	9.46	703.7	0.000275	0.03	1
34064	XM_021947671.1	LOC110747510	XP_021803363.1	181	(-)-alpha-pinene synthase-like	222.73	-2.27	-4.84	1.01e-06	0.000713	0.03
34105	XM_021947716.1	LOC110747564	XP_021803408.1	142	uncharacterized protein LOC110747564	33.3	3.31	9.9	1.04e-05	0.00312	0.32
34135	XM_021947752.1	LOC110747602	XP_021803444.1	108	uncharacterized protein LOC110747602	282.59	4.93	30.42	4.55e-07	0.000454	0.01
34324	XM_021947971.1	LOC110747902	XP_021803663.1	203.333	uncharacterized protein LOC110747902	15.51	9.74	852.67	0.000287	0.03	1
34332	XM_021947980.1	LOC110747917	XP_021803672.1	169	tetraspanin-8-like	29.93	5.04	32.94	1.89e-05	0.00457	0.58
34474	XM_021948135.1	LOC110748106	XP_021803827.1	216	DEAD-box ATP-dependent RNA helicase 32-like	6.21	5.99	63.72	7.71e-05	0.01	1
34524	XM_021948191.1	LOC110748165	XP_021803883.1	145	phosphatidylinositol/phosphatidylcholine transfer protein SFH8-like	49.34	10.01	1034.51	7.82e-05	0.01	1
34775	XM_021948475.1	LOC110748500	XP_021804167.1	364	low-temperature-induced 65 kDa protein-like	24.36	9.86	927.06	0.000126	0.02	1
35009	XM_021948735.1	LOC110748786	XP_021804427.1	734	ferric reduction oxidase 7, chloroplastic-like	20.8	-1.3	-2.47	0.000292	0.03	1

## Sheet: S7_distal_A1M197
Supplementary Table S7. The differentially expressed genes from the distal samples of sweet cherry inoculated with Pss strain A1M197.
No. protein	Gene	Gene ID (LOC)	Protein ID	Size (aa)	Description	Max group mean	Log₂ fold change	Fold change	P-value	FDR p-value	Bonferroni
15	XM_021969064.1	LOC110762897	XP_021824756.1	404	ethylene-responsive transcription factor ERF110-like	7.73	-2.77	-6.83	9.89e-05	0.01	1
193	XM_021966491.1	LOC110763632	XP_021822183.1	664	xyloglucan glycosyltransferase 4	37.71	1.72	3.29	6.79e-05	0.00853	1
202	XM_021961829.1	LOC110759694	XP_021817521.1	590	senescence-associated carboxylesterase 101	98.14	-1.31	-2.49	0.000407	0.03	1
232	XM_021954634.1	LOC110753661	XP_021810326.1	376	probable galacturonosyltransferase-like 10	45.64	4.75	26.87	7.37e-13	1.57e-09	2.26e-08
315	XM_021978008.1	LOC110773456	XP_021833700.1	215	uncharacterized protein DDB_G0271670-like	248.57	-2.78	-6.85	3.86e-05	0.00552	1
415	XM_021948911.1	LOC110748926	XP_021804603.1	478	amino acid transporter AVT1H	6.91	7.1	136.82	3.08e-09	2e-06	9.45e-05
784	XM_021953407.1	LOC110752691	XP_021809099.1	840	receptor-like protein kinase THESEUS 1	70.3	1.18	2.27	0.000599	0.04	1
810	XM_021954097.1	LOC110753236	XP_021809789.1	2264	acetyl-CoA carboxylase 1-like	27.56	1.61	3.05	9.07e-05	0.01	1
811	XM_021954106.1	LOC110753236	XP_021809798.1	2264	acetyl-CoA carboxylase 1-like	27.76	1.55	2.92	0.000175	0.02	1
812	XM_021954113.1	LOC110753236	XP_021809805.1	2264	acetyl-CoA carboxylase 1-like	27.4	1.64	3.13	4.88e-05	0.00664	1
822	XM_021953650.1	LOC110752889	XP_021809342.1	663	low affinity sulfate transporter 3	17.54	-3.47	-11.06	0.000201	0.02	1
896	XM_021954036.1	LOC110753196	XP_021809728.1	940	nitrate reductase NAD(P)H-like	44.31	2.48	5.59	9.01e-10	6.8e-07	2.77e-05
897	XM_021954515.1	LOC110753582	XP_021810207.1	157	probable calcium-binding protein CML29	47.99	3.72	13.19	5.72e-05	0.00755	1
903	XM_021954086.1	LOC110753227	XP_021809778.1	805	oxysterol-binding protein-related protein 1C	68.16	1.18	2.27	0.000661	0.05	1
919	XM_021955180.1	LOC110754141	XP_021810872.1	337	flavonol synthase/flavanone 3-hydroxylase	198.38	3.21	9.24	6.41e-06	0.00125	0.2
1072	XM_021956754.1	LOC110755520	XP_021812446.1	317	uncharacterized protein LOC110755520 isoform X2	13.93	-5.7	-52.08	1.14e-07	4.52e-05	0.0035
1073	XM_021956747.1	LOC110755520	XP_021812439.1	320	uncharacterized protein LOC110755520 isoform X1	166.58	-2.67	-6.36	8.81e-11	9.36e-08	2.7e-06
1384	XM_021959313.1	LOC110757629	XP_021815005.1	305	thaumatin-like protein 1b	9.96	-3.72	-13.14	9.92e-06	0.0018	0.3
1399	XM_021960102.1	LOC110758277	XP_021815794.1	360	naringenin,2-oxoglutarate 3-dioxygenase	327.23	2.61	6.08	1.48e-06	0.000379	0.05
1499	XM_021960902.1	LOC110758924	XP_021816594.1	391	chalcone synthase 2-like	294.99	3.25	9.49	8.52e-06	0.00161	0.26
1656	XM_021963042.1	LOC110760729	XP_021818734.1	83	uncharacterized protein LOC110760729	80.86	3.45	10.92	1.89e-07	6.6e-05	0.0058
1998	XM_021966896.1	LOC110763999	XP_021822588.1	720	SWI/SNF-related matrix-associated actin-dependent regulator of chromatin subfamily A-like protein 1 isoform X1	5.45	6.05	66.38	1.79e-07	6.33e-05	0.00549
2120	XM_021968370.1	LOC110765280	XP_021824062.1	485	protein ALP1-like	66.33	-1.81	-3.51	9.84e-06	0.0018	0.3
2138	XM_021967868.1	LOC110764833	XP_021823560.1	495	IQ domain-containing protein IQM1-like	132.23	1.68	3.2	4.37e-05	0.00611	1
2162	XM_021967669.1	LOC110764655	XP_021823361.1	659	probable leucine-rich repeat receptor-like protein kinase At1g68400	22.52	2.07	4.2	1.8e-05	0.00299	0.55
2244	XM_021969666.1	LOC110766340	XP_021825358.1	298	heat stress transcription factor B-1 isoform X2	30.83	1.8	3.47	0.000535	0.04	1
2440	XM_021971014.1	LOC110767468	XP_021826706.1	723	phenylalanine ammonia-lyase 1	79.04	2.48	5.58	5.99e-05	0.00774	1
2522	XM_021972157.1	LOC110768427	XP_021827849.1	286	protein PHLOEM PROTEIN 2-LIKE A1-like	7.8	4.05	16.53	0.000309	0.03	1
2523	XM_021972169.1	LOC110768438	XP_021827861.1	184	protein PHLOEM PROTEIN 2-LIKE A9	16.89	4.48	22.31	3.59e-06	0.000806	0.11
2638	XM_021973230.1	LOC110769283	XP_021828922.1	528	cytochrome P450 78A5-like	279.86	1.61	3.06	0.000114	0.01	1
3208	XM_021944448.1	LOC110744471	XP_021800140.1	832	LRR receptor-like serine/threonine-protein kinase GSO1 isoform X1	4.6	-3.99	-15.84	6.47e-05	0.00822	1
3209	XM_021944456.1	LOC110744471	XP_021800148.1	832	LRR receptor-like serine/threonine-protein kinase GSO1 isoform X1	4.4	-4.25	-19.02	3.97e-06	0.000884	0.12
3354	XM_021945555.1	LOC110745463	XP_021801247.1	491	phosphoethanolamine N-methyltransferase 1	32.04	-2.06	-4.18	0.000322	0.03	1
3547	XM_021947877.1	LOC110747768	XP_021803569.1	357	leucoanthocyanidin dioxygenase	124.12	2.56	5.88	3.77e-08	1.96e-05	0.00116
3834	XM_021948968.1	LOC110748978	XP_021804660.1	379	early nodulin-75-like	35.34	-3.68	-12.85	2.34e-11	2.73e-08	7.17e-07
4028	XM_021949364.1	LOC110749291	XP_021805056.1	549	IQ domain-containing protein IQM1	34.09	2.01	4.03	9.3e-06	0.00171	0.29
4045	XM_021949227.1	LOC110749186	XP_021804919.1	547	protein ALP1-like	286.32	2.99	7.93	1.14e-11	1.56e-08	3.49e-07
4168	XM_021949318.1	LOC110749249	XP_021805010.1	215	ethylene-responsive transcription factor ERF017	18.69	4.05	16.53	2.06e-07	7.07e-05	0.00631
4190	XM_021949179.1	LOC110749150	XP_021804871.1	1742	uncharacterized protein LOC110749150 isoform X1	79.95	1.31	2.49	0.000549	0.04	1
4192	XM_021949181.1	LOC110749150	XP_021804873.1	1462	uncharacterized protein LOC110749150 isoform X3	1.2	-6.3	-78.6	0.000265	0.02	1
4326	XM_021949498.1	LOC110749394	XP_021805190.1	319	ethylene-responsive transcription factor ERF071	40.29	1.76	3.38	8.24e-05	0.00998	1
4405	XM_021949609.1	LOC110749497	XP_021805301.1	424	probable WRKY transcription factor protein 1	21.03	-3.7	-13.03	2.73e-05	0.00411	0.84
4454	XM_021949637.1	LOC110749526	XP_021805329.1	273	protein SRC2 homolog isoform X2	126.76	1.85	3.6	5.9e-07	0.000175	0.02
4476	XM_021949698.1	LOC110749579	XP_021805390.1	487	anthocyanidin 3-O-glucosyltransferase 2-like	26.96	2.82	7.06	1.38e-07	5.18e-05	0.00424
4543	XM_021949681.1	LOC110749563	XP_021805373.1	339	protein DOWNY MILDEW RESISTANCE 6	5.85	-3.15	-8.89	0.000395	0.03	1
4719	XM_021949890.1	LOC110749724	XP_021805582.1	678	zinc finger CCCH domain-containing protein 29-like	673	2.19	4.56	9.73e-09	5.69e-06	0.000299
4775	XM_021949980.1	LOC110749796	XP_021805672.1	259	bidirectional sugar transporter SWEET1-like	34.27	2.85	7.2	7.69e-06	0.00149	0.24
4813	XM_021950068.1	LOC110749865	XP_021805760.1	454	protein trichome birefringence-like 10	27.06	-1.54	-2.91	0.000682	0.05	1
4951	XM_021950187.1	LOC110749963	XP_021805879.1	983	receptor like protein 30-like	1.37	-5.82	-56.38	0.000154	0.02	1
5268	XM_021950563.1	LOC110750264	XP_021806255.1	308	RING-H2 finger protein ATL2-like	101.76	2.41	5.32	0.000144	0.01	1
5353	XM_021950638.1	LOC110750328	XP_021806330.1	310	NADP-dependent D-sorbitol-6-phosphate dehydrogenase-like	297.44	1.95	3.86	5.88e-08	2.86e-05	0.0018
5527	XM_021950767.1	LOC110750430	XP_021806459.1	424	basic 7S globulin-like	12.5	-4.1	-17.21	6.03e-05	0.00774	1
5573	XM_021950855.1	LOC110750518	XP_021806547.1	487	amino acid permease 3-like isoform X2	10.2	3.37	10.33	0.000448	0.04	1
5675	XM_021950984.1	LOC110750625	XP_021806676.1	356	zinc transporter 8-like	26.88	-2.36	-5.12	8.51e-05	0.01	1
5721	XM_021951045.1	LOC110750687	XP_021806737.1	465	ethylene-responsive transcription factor ABR1-like	32.64	-3.7	-12.98	9.72e-19	5.68e-15	2.98e-14
5739	XM_021951054.1	LOC110750697	XP_021806746.1	479	tryptophan aminotransferase-related protein 4-like isoform X1	35.22	2.11	4.32	6.24e-06	0.00124	0.19
5852	XM_021951198.1	LOC110750828	XP_021806890.1	584	root phototropism protein 2	13.2	-2.95	-7.7	0.000125	0.01	1
5865	XM_021951152.1	LOC110750787	XP_021806844.1	505	trans-cinnamate 4-monooxygenase	423.79	2.5	5.64	1.6e-08	9.11e-06	0.00049
5975	XM_021951256.1	LOC110750878	XP_021806948.1	336	ubiquinol oxidase, mitochondrial-like	34.58	2.44	5.42	4.74e-05	0.00649	1
6106	XM_021951490.1	LOC110751071	XP_021807182.1	1018	receptor-like protein kinase 5	14.01	-1.8	-3.48	0.000543	0.04	1
6115	XM_021951403.1	LOC110750992	XP_021807095.1	185	uncharacterized protein LOC110750992	27.4	-3.54	-11.6	0.000631	0.05	1
6171	XM_021951442.1	LOC110751022	XP_021807134.1	1256	uncharacterized protein LOC110751022	95.56	1.52	2.87	1.6e-05	0.00273	0.49
6570	XM_021951990.1	LOC110751515	XP_021807682.1	360	BTB/POZ and TAZ domain-containing protein 1-like	362.32	1.7	3.24	4.18e-06	0.000913	0.13
6603	XM_021952030.1	LOC110751548	XP_021807722.1	654	probable ADP-ribosylation factor GTPase-activating protein AGD14 isoform X2	2.01	-4.95	-30.9	0.000221	0.02	1
6696	XM_021952146.1	LOC110751644	XP_021807838.1	563	putative UPF0481 protein At3g02645	3.39	-3.94	-15.37	0.000217	0.02	1
6844	XM_021952341.1	LOC110751817	XP_021808033.1	313	acidic endochitinase-like	221.86	-2.18	-4.52	3.1e-06	0.000711	0.1
6875	XM_021952283.1	LOC110751775	XP_021807975.1	447	delta(8)-fatty-acid desaturase 1-like	83.33	1.38	2.6	0.000132	0.01	1
6876	XM_021952284.1	LOC110751775	XP_021807976.1	447	delta(8)-fatty-acid desaturase 1-like	83.64	1.37	2.58	8.64e-05	0.01	1
6954	XM_021952563.1	LOC110751992	XP_021808255.1	332	protein EXORDIUM-like	180.34	3.31	9.91	1.44e-10	1.47e-07	4.43e-06
6955	XM_021952515.1	LOC110751946	XP_021808207.1	332	protein EXORDIUM-like isoform X2	200.68	3.3	9.86	1.48e-11	1.92e-08	4.53e-07
6956	XM_021952514.1	LOC110751946	XP_021808206.1	332	protein EXORDIUM-like isoform X1	111.76	3.33	10.07	8.62e-12	1.4e-08	2.65e-07
6957	XM_021952516.1	LOC110751947	XP_021808208.1	319	protein EXORDIUM-like	129.35	3.51	11.41	2.27e-13	5.32e-10	6.98e-09
6984	XM_021952471.1	LOC110751918	XP_021808163.1	167	uncharacterized protein LOC110751918	39.42	3.07	8.38	2.82e-06	0.000653	0.09
7078	XM_021952474.1	LOC110751921	XP_021808166.1	319	mitochondrial uncoupling protein 5-like	259.62	3.25	9.49	7.52e-07	0.000214	0.02
7313	XM_021952809.1	LOC110752209	XP_021808501.1	732	G-type lectin S-receptor-like serine/threonine-protein kinase At4g27290 isoform X3	3.57	10.01	1032.66	4.65e-05	0.00643	1
7352	XM_021952855.1	LOC110752241	XP_021808547.1	286	probable CCR4-associated factor 1 homolog 11	142.7	3.23	9.39	3.46e-08	1.88e-05	0.00106
7646	XM_021953187.1	LOC110752514	XP_021808879.1	534	(R)-mandelonitrile lyase 1-like isoform X2	3.21	4.6	24.19	0.000147	0.01	1
7672	XM_021953205.1	LOC110752525	XP_021808897.1	454	flavonoid 3-O-glucosyltransferase-like	65.26	2.81	7.03	1.37e-07	5.18e-05	0.00419
7690	XM_021953234.1	LOC110752550	XP_021808926.1	296	probable xyloglucan endotransglucosylase/hydrolase protein 23	57.09	2.49	5.6	1.17e-06	0.000311	0.04
7820	XM_021953388.1	LOC110752675	XP_021809080.1	1143	uncharacterized protein LOC110752675 isoform X1	1.94	3.48	11.15	0.000156	0.02	1
7935	XM_021953490.1	LOC110752764	XP_021809182.1	370	mitogen-activated protein kinase 3	257.75	1.31	2.48	0.000152	0.02	1
8076	XM_021953649.1	LOC110752892	XP_021809341.1	589	(3S,6E)-nerolidol synthase 1-like	12.37	-3.58	-11.97	1.81e-10	1.69e-07	5.54e-06
8112	XM_021953798.1	LOC110753005	XP_021809490.1	812	probable disease resistance protein At5g66900 isoform X2	81.7	3.09	8.52	1.08e-11	1.56e-08	3.32e-07
8408	XM_021954087.1	LOC110753230	XP_021809779.1	297	uncharacterized protein LOC110753230	11.03	-5.48	-44.76	1.64e-06	0.000413	0.05
8564	XM_021954222.1	LOC110753332	XP_021809914.1	510	flavonoid 3'-monooxygenase	341.34	2.13	4.38	4.44e-05	0.00617	1
8675	XM_021954384.1	LOC110753472	XP_021810076.1	315	probable xyloglucan endotransglucosylase/hydrolase protein 23	33.96	2.83	7.13	4.81e-06	0.00102	0.15
8682	XM_021954366.1	LOC110753456	XP_021810058.1	544	4-coumarate--CoA ligase 2-like	20.19	3.22	9.31	0.000467	0.04	1
8733	XM_021954350.1	LOC110753438	XP_021810042.1	892	probable pre-mRNA-splicing factor ATP-dependent RNA helicase DEAH5 isoform X3	2.29	7.02	129.62	6.3e-06	0.00124	0.19
8994	XM_021954704.1	LOC110753748	XP_021810396.1	952	MDIS1-interacting receptor like kinase 2-like	14.76	-2.38	-5.21	1.98e-06	0.000472	0.06
9076	XM_021954710.1	LOC110753755	XP_021810402.1	895	transportin-1 isoform X1	4.91	-3.82	-14.12	9.69e-05	0.01	1
9114	XM_021954899.1	LOC110753913	XP_021810591.1	585	probable serine/threonine-protein kinase WNK4 isoform X1	43.55	1.45	2.73	8.74e-05	0.01	1
9172	XM_021954818.1	LOC110753837	XP_021810510.1	370	GDSL esterase/lipase At2g30310-like	20.95	1.73	3.32	0.00052	0.04	1
9423	XM_021955079.1	LOC110754077	XP_021810771.1	356	leucoanthocyanidin reductase-like isoform X2	13.54	5.5	45.24	1.35e-06	0.000351	0.04
9424	XM_021955080.1	LOC110754077	XP_021810772.1	356	leucoanthocyanidin reductase-like isoform X2	13.26	4.24	18.93	5e-05	0.00676	1
9425	XM_021955078.1	LOC110754077	XP_021810770.1	356	leucoanthocyanidin reductase-like isoform X1	13.79	3.68	12.82	0.000455	0.04	1
9503	XM_021955251.1	LOC110754210	XP_021810943.1	699	geranylgeranyl transferase type-2 subunit alpha 1-like isoform X2	2.42	4.8	27.93	0.000441	0.03	1
9637	XM_021955371.1	LOC110754313	XP_021811063.1	216	histone H1-like	198.81	-2	-4.01	2.12e-05	0.00333	0.65
9674	XM_021955438.1	LOC110754380	XP_021811130.1	889	autophagy-related protein 18f isoform X2	1.19	5.93	61.1	0.000161	0.02	1
9693	XM_021955441.1	LOC110754384	XP_021811133.1	584	scarecrow-like protein 21	118.22	1.27	2.41	0.00068	0.05	1
9754	XM_021955531.1	LOC110754464	XP_021811223.1	618	probable terpene synthase 9	5.41	-2.97	-7.83	0.000627	0.05	1
9879	XM_021955732.1	LOC110754633	XP_021811424.1	341	UPF0496 protein 4-like	26.94	2.92	7.57	6.36e-05	0.00813	1
10020	XM_021955812.1	LOC110754709	XP_021811504.1	658	probable galacturonosyltransferase 3 isoform X3	3.85	4.58	23.89	0.000307	0.03	1
10233	XM_021956031.1	LOC110754907	XP_021811723.1	285	xyloglucan endotransglucosylase/hydrolase 2-like	57.7	5.05	33.24	2.69e-17	8.97e-14	8.25e-13
10234	XM_021956030.1	LOC110754906	XP_021811722.1	287	xyloglucan endotransglucosylase/hydrolase 2-like	43.72	4.64	24.95	4.25e-15	1.24e-11	1.3e-10
10235	XM_021956032.1	LOC110754908	XP_021811724.1	279	xyloglucan endotransglucosylase/hydrolase 2-like	34.65	2.85	7.2	4.5e-07	0.000139	0.01
10236	XM_021956033.1	LOC110754911	XP_021811725.1	288	xyloglucan endotransglucosylase/hydrolase 2-like	41.17	2.77	6.84	5.05e-07	0.000151	0.02
10237	XM_021956036.1	LOC110754913	XP_021811728.1	282	xyloglucan endotransglucosylase/hydrolase 2-like	102.87	3.9	14.95	1.98e-14	5.15e-11	6.09e-10
10238	XM_021956034.1	LOC110754912	XP_021811726.1	285	xyloglucan endotransglucosylase/hydrolase 2-like	34.72	4.33	20.16	1.06e-12	2.06e-09	3.24e-08
10239	XM_021956035.1	LOC110754912	XP_021811727.1	285	xyloglucan endotransglucosylase/hydrolase 2-like	33.32	4.22	18.6	2.45e-09	1.69e-06	7.53e-05
10309	XM_021956133.1	LOC110754993	XP_021811825.1	119	calcium-binding protein PBP1-like	104.88	2.81	7.01	6.96e-07	0.000201	0.02
10360	XM_021956215.1	LOC110755060	XP_021811907.1	235	uncharacterized protein LOC110755060	97.76	1.97	3.92	9.42e-05	0.01	1
10787	XM_021956654.1	LOC110755455	XP_021812346.1	577	protein NUCLEAR FUSION DEFECTIVE 4	29.25	-1.87	-3.66	3.02e-05	0.00447	0.93
11079	XM_021957017.1	LOC110755752	XP_021812709.1	293	transcription factor MYB108-like	15.25	2.6	6.05	0.000601	0.04	1
11548	XM_021957470.1	LOC110756090	XP_021813162.1	191	uncharacterized protein LOC110756090	61.2	2.16	4.45	0.000106	0.01	1
11606	XM_021957586.1	LOC110756187	XP_021813278.1	1899	callose synthase 10 isoform X2	5.24	-3.11	-8.65	0.000411	0.03	1
11622	XM_021957592.1	LOC110756192	XP_021813284.1	185	probable calcium-binding protein CML31	308.39	2.62	6.14	2.58e-08	1.43e-05	0.000791
11695	XM_021957676.1	LOC110756268	XP_021813368.1	1111	eIF-2-alpha kinase GCN2 isoform X2	2.27	5.84	57.37	0.000165	0.02	1
11943	XM_021958045.1	LOC110756601	XP_021813737.1	456	UDP-glycosyltransferase 76F1-like	24.28	2.21	4.64	5.89e-05	0.00769	1
11983	XM_021958112.1	LOC110756661	XP_021813804.1	483	ultraviolet-B receptor UVR8-like isoform X2	19.67	2.87	7.32	2.49e-05	0.00378	0.76
12051	XM_021958118.1	LOC110756666	XP_021813810.1	303	uncharacterized protein LOC110756666	78.06	1.36	2.57	0.000278	0.02	1
12175	XM_021958129.1	LOC110756675	XP_021813821.1	232	chalcone--flavonone isomerase	155.78	1.82	3.54	0.00011	0.01	1
12296	XM_021958441.1	LOC110756942	XP_021814133.1	1542	probable phosphoinositide phosphatase SAC9 isoform X2	2.38	-8.18	-290.4	1.12e-05	0.00199	0.34
12350	XM_021958355.1	LOC110756877	XP_021814047.1	506	probable WRKY transcription factor 32 isoform X3	7.16	2.84	7.17	0.000248	0.02	1
12451	XM_021958491.1	LOC110756983	XP_021814183.1	539	cytochrome P450 82G1-like	197.81	-3.98	-15.77	1.65e-10	1.61e-07	5.06e-06
12486	XM_021958503.1	LOC110756989	XP_021814195.1	618	probable methionine--tRNA ligase isoform X2	3.96	3.3	9.84	0.0001	0.01	1
12500	XM_021958579.1	LOC110757058	XP_021814271.1	556	(-)-alpha-pinene synthase-like isoform X2	116.64	-3.99	-15.84	8.45e-08	3.6e-05	0.00259
12501	XM_021958578.1	LOC110757058	XP_021814270.1	557	(-)-alpha-pinene synthase-like isoform X1	14.63	-4.33	-20.05	5.35e-09	3.38e-06	0.000164
12528	XM_021958604.1	LOC110757076	XP_021814296.1	314	transcription factor PCL1	14.28	-2.3	-4.93	0.000291	0.03	1
12529	XM_021958605.1	LOC110757076	XP_021814297.1	314	transcription factor PCL1	17.01	-2.46	-5.51	7.02e-05	0.00878	1
12533	XM_021958612.1	LOC110757080	XP_021814304.1	363	E3 ubiquitin-protein ligase RDUF2	138.34	2.59	6.03	1.34e-07	5.18e-05	0.00411
12831	XM_021959004.1	LOC110757413	XP_021814696.1	1513	putative ABC transporter C family member 15	15.33	2.25	4.75	2.29e-06	0.00054	0.07
12957	XM_021959053.1	LOC110757455	XP_021814745.1	476	patellin-4-like	6.28	2.94	7.66	3.05e-05	0.00448	0.94
13064	XM_021959253.1	LOC110757594	XP_021814945.1	481	F-box/LRR-repeat protein At4g14103-like	2.83	3.29	9.77	0.000402	0.03	1
13067	XM_021959202.1	LOC110757550	XP_021814894.1	262	putative methyltransferase DDB_G0268948	14.06	4.22	18.59	2.11e-07	7.15e-05	0.00648
13123	XM_021959269.1	LOC110757606	XP_021814961.1	967	lysine-specific demethylase JMJ25 isoform X4	1.46	-3.95	-15.51	0.00027	0.02	1
13484	XM_021959691.1	LOC110757945	XP_021815383.1	240	cysteine-rich repeat secretory protein 38-like	16.13	2.49	5.61	0.000118	0.01	1
13523	XM_021959714.1	LOC110757959	XP_021815406.1	1977	DExH-box ATP-dependent RNA helicase DExH14 isoform X3	0.61	6.84	114.28	1.97e-05	0.00313	0.6
13529	XM_021959775.1	LOC110758001	XP_021815467.1	351	uncharacterized protein LOC110758001	251.66	2.06	4.16	1.05e-06	0.000286	0.03
13548	XM_021959706.1	LOC110757955	XP_021815398.1	179	F-box protein At1g61340-like	102.24	1.98	3.93	1.72e-05	0.00289	0.53
13566	XM_021959768.1	LOC110757995	XP_021815460.1	522	sugar carrier protein C	9.69	-2.59	-6	1.88e-05	0.00301	0.58
13882	XM_021960103.1	LOC110758279	XP_021815795.1	898	probable leucine-rich repeat receptor-like protein kinase At5g49770	17.69	-2.33	-5.04	9.1e-09	5.46e-06	0.000279
13884	XM_021960101.1	LOC110758278	XP_021815793.1	949	probable leucine-rich repeat receptor-like protein kinase At5g49770	4.64	-2.24	-4.73	0.000659	0.05	1
13948	XM_021960189.1	LOC110758353	XP_021815881.1	767	calcium-transporting ATPase 8, plasma membrane-type-like isoform X4	1.06	-4.71	-26.14	0.000692	0.05	1
14014	XM_021960151.1	LOC110758323	XP_021815843.1	385	oxysterol-binding protein-related protein 4B	29.46	2.46	5.49	4.75e-08	2.36e-05	0.00146
14100	XM_021960362.1	LOC110758490	XP_021816054.1	475	putative UDP-glucose glucosyltransferase isoform X2	42.6	2.33	5.04	6.77e-05	0.00853	1
14172	XM_021960453.1	LOC110758567	XP_021816145.1	604	4-coumarate--CoA ligase 2-like	35.53	2.94	7.65	0.000472	0.04	1
14213	XM_021960506.1	LOC110758603	XP_021816198.1	1487	uncharacterized protein LOC110758603 isoform X5	15.49	1.59	3.02	9.55e-05	0.01	1
14326	XM_021960651.1	LOC110758734	XP_021816343.1	371	probable protein phosphatase 2C 25	111.36	1.79	3.45	0.000106	0.01	1
14605	XM_021960908.1	LOC110758931	XP_021816600.1	728	uncharacterized protein LOC110758931 isoform X3	19.24	-2.36	-5.12	4.21e-05	0.00592	1
14606	XM_021960906.1	LOC110758931	XP_021816598.1	730	uncharacterized protein LOC110758931 isoform X1	6.83	8.8	445.99	4.33e-08	2.2e-05	0.00133
14702	XM_021960974.1	LOC110758987	XP_021816666.1	1776	nuclear pore complex protein NUP214 isoform X1	1.91	10.59	1544.15	1.73e-06	0.000422	0.05
14907	XM_021961241.1	LOC110759206	XP_021816933.1	197	protein SRC2-like	366.45	1.79	3.47	2.27e-05	0.00351	0.7
14919	XM_021961289.1	LOC110759244	XP_021816981.1	319	thiosulfate/3-mercaptopyruvate sulfurtransferase 1, mitochondrial isoform X2	19.1	5.55	46.83	8.19e-08	3.6e-05	0.00252
15021	XM_021961402.1	LOC110759351	XP_021817094.1	178	BON1-associated protein 2-like	7.56	4.89	29.72	4.73e-05	0.00649	1
15022	XM_021961341.1	LOC110759287	XP_021817033.1	176	BON1-associated protein 2-like	38.9	4.12	17.43	5.23e-10	4.36e-07	1.6e-05
15413	XM_021961713.1	LOC110759626	XP_021817405.1	532	bifunctional 3-dehydroquinate dehydratase/shikimate dehydrogenase, chloroplastic-like isoform X1	35.28	4.44	21.77	3.88e-05	0.00552	1
15446	XM_021961699.1	LOC110759615	XP_021817391.1	358	uncharacterized protein LOC110759615	36.76	3.53	11.52	8.15e-05	0.00992	1
15802	XM_021962260.1	LOC110760073	XP_021817952.1	2347	small subunit processome component 20 homolog isoform X3	1.56	-7.83	-226.86	1.87e-05	0.00301	0.58
15967	XM_021962427.1	LOC110760198	XP_021818119.1	269	protein TIFY 9	41.86	-2.67	-6.36	8.47e-08	3.6e-05	0.0026
16022	XM_021962503.1	LOC110760264	XP_021818195.1	643	cyclic nucleotide-gated ion channel 1-like isoform X1	3.18	4.88	29.45	1.38e-05	0.00237	0.42
16033	XM_021962509.1	LOC110760268	XP_021818201.1	227	uncharacterized protein LOC110760268	31.73	3.89	14.84	1.04e-07	4.19e-05	0.00319
16048	XM_021962523.1	LOC110760279	XP_021818215.1	1055	protein GIGANTEA isoform X3	5.5	7.24	150.86	2.46e-07	7.87e-05	0.00754
16197	XM_021962702.1	LOC110760438	XP_021818394.1	361	auxin efflux carrier component 5	5.39	4.53	23.18	0.00012	0.01	1
16294	XM_021962777.1	LOC110760497	XP_021818469.1	449	D-cysteine desulfhydrase 2, mitochondrial isoform X3	1.38	-5.9	-59.52	0.000402	0.03	1
16379	XM_021962892.1	LOC110760590	XP_021818584.1	150	auxin-responsive protein SAUR71-like	76.23	-3.12	-8.72	4.88e-07	0.000148	0.01
16380	XM_021962893.1	LOC110760591	XP_021818585.1	104	auxin-responsive protein SAUR50-like	16.89	-5.37	-41.31	0.000245	0.02	1
16418	XM_021962974.1	LOC110760670	XP_021818666.1	560	hydroquinone glucosyltransferase-like isoform X1	9.86	4.94	30.63	0.000429	0.03	1
16425	XM_021962954.1	LOC110760655	XP_021818646.1	173	uncharacterized protein LOC110760655	70.79	3.24	9.42	0.000105	0.01	1
16608	XM_021963142.1	LOC110760812	XP_021818834.1	308	chitinase 2-like	4.47	-4.41	-21.31	0.000606	0.04	1
16644	XM_021963157.1	LOC110760828	XP_021818849.1	225	cinnamoyl-CoA reductase-like SNL6 isoform X2	7	5.07	33.69	0.000708	0.05	1
16779	XM_021963313.1	LOC110760953	XP_021819005.1	1029	putative calcium-transporting ATPase 13, plasma membrane-type	8.23	-2.45	-5.48	1.84e-05	0.003	0.56
16979	XM_021963704.1	LOC110761263	XP_021819396.1	762	putative wall-associated receptor kinase-like 16	12.16	-1.95	-3.85	0.000567	0.04	1
17211	XM_021963813.1	LOC110761350	XP_021819505.1	235	NEP1-interacting protein 1-like	26.13	2.12	4.34	8.23e-06	0.00156	0.25
17247	XM_021963845.1	LOC110761380	XP_021819537.1	311	uncharacterized protein LOC110761380	3.86	-4.97	-31.3	0.00043	0.03	1
17300	XM_021963948.1	LOC110761468	XP_021819640.1	229	photosystem I reaction center subunit III, chloroplastic	124.77	-1.35	-2.56	0.000252	0.02	1
17825	XM_021964521.1	LOC110761939	XP_021820213.1	90	uncharacterized protein LOC110761939	1267.97	2.72	6.6	1.71e-07	6.14e-05	0.00524
17878	XM_021964471.1	LOC110761885	XP_021820163.1	248	uncharacterized protein LOC110761885 isoform X1	56.09	-1.78	-3.44	1.61e-05	0.00273	0.49
17975	XM_021964694.1	LOC110762089	XP_021820386.1	178	zinc finger protein ZAT12-like	19.87	3.57	11.91	1.86e-05	0.00301	0.57
17977	XM_021964648.1	LOC110762054	XP_021820340.1	468	uncharacterized protein LOC110762054 isoform X2	4.06	8.52	366.36	0.000597	0.04	1
17997	XM_021964649.1	LOC110762056	XP_021820341.1	103	histone H4	72.19	-1.9	-3.74	6e-05	0.00774	1
18121	XM_021964798.1	LOC110762193	XP_021820490.1	211	uncharacterized protein LOC110762193	378.93	1.3	2.46	0.000689	0.05	1
18124	XM_021964801.1	LOC110762196	XP_021820493.1	209	uncharacterized protein LOC110762196	136.14	1.63	3.09	0.000557	0.04	1
18346	XM_021965083.1	LOC110762448	XP_021820775.1	850	putative SWI/SNF-related matrix-associated actin-dependent regulator of chromatin subfamily A member 3-like 1 isoform X2	2.03	8.7	414.88	0.000396	0.03	1
18428	XM_021965107.1	LOC110762464	XP_021820799.1	193	uncharacterized protein LOC110762464	40.01	2.04	4.11	0.000646	0.05	1
18489	XM_021965254.1	LOC110762605	XP_021820946.1	253	chorismate mutase 2	190.18	2.28	4.86	2.38e-07	7.72e-05	0.0073
18566	XM_021965294.1	LOC110762634	XP_021820986.1	301	uncharacterized protein LOC110762634 isoform X1	15.6	2.7	6.52	0.000183	0.02	1
18813	XM_021965636.1	LOC110762914	XP_021821328.1	580	calmodulin-binding protein 60 G-like isoform X2	105.85	1.89	3.7	1.29e-06	0.000339	0.04
19009	XM_021965822.1	LOC110763077	XP_021821514.1	311	polyadenylate-binding protein RBP45B-like isoform X2	1.11	-5.83	-57.06	0.000542	0.04	1
19034	XM_021965860.1	LOC110763106	XP_021821552.1	394	glucose-6-phosphate/phosphate translocator 2, chloroplastic	259.32	1.78	3.44	9.71e-07	0.000267	0.03
19054	XM_021965777.1	LOC110763044	XP_021821469.1	368	gibberellin 2-beta-dioxygenase 8 isoform X1	126.36	2.01	4.02	4.98e-06	0.00104	0.15
19055	XM_021965778.1	LOC110763044	XP_021821470.1	368	gibberellin 2-beta-dioxygenase 8 isoform X1	127.71	2.01	4.04	5.87e-06	0.00117	0.18
19056	XM_021965779.1	LOC110763044	XP_021821471.1	368	gibberellin 2-beta-dioxygenase 8 isoform X1	130	2.09	4.26	1.71e-06	0.000421	0.05
19340	XM_021966204.1	LOC110763418	XP_021821896.1	873	probable myosin-binding protein 4 isoform X1	1.96	4.56	23.59	8.54e-05	0.01	1
19376	XM_021966234.1	LOC110763446	XP_021821926.1	768	protein LONGIFOLIA 1	21.96	-6.15	-71.17	2.89e-09	1.93e-06	8.88e-05
19515	XM_021966419.1	LOC110763597	XP_021822111.1	478	UPF0481 protein At3g47200-like	95.87	-1.48	-2.79	0.00025	0.02	1
19608	XM_021966467.1	LOC110763639	XP_021822159.1	628	vacuolar-sorting receptor 7 isoform X2	14.2	-3.53	-11.54	6.72e-08	3.05e-05	0.00206
19725	XM_021966610.1	LOC110763764	XP_021822302.1	636	uncharacterized protein LOC110763764	20.18	2.16	4.46	9.3e-05	0.01	1
19838	XM_021966734.1	LOC110763854	XP_021822426.1	153	protein PHLOEM PROTEIN 2-LIKE A1-like	34.09	3.25	9.53	0.000343	0.03	1
19951	XM_021966864.1	LOC110763975	XP_021822556.1	575	uncharacterized protein At1g04910-like	35.93	1.96	3.88	1.08e-06	0.000291	0.03
20015	XM_021966973.1	LOC110764063	XP_021822665.1	769	protein LHY isoform X1	76.96	4.18	18.1	6.04e-29	1.41e-24	1.85e-24
20016	XM_021966974.1	LOC110764063	XP_021822666.1	769	protein LHY isoform X1	77.46	4.02	16.22	1.43e-24	1.67e-20	4.39e-20
20057	XM_021967057.1	LOC110764133	XP_021822749.1	450	zinc finger protein CONSTANS-LIKE 6-like	37.26	-3.11	-8.65	9.38e-08	3.91e-05	0.00288
20119	XM_021967059.1	LOC110764138	XP_021822751.1	653	dynamin-related protein 4C-like isoform X1	3.59	4.19	18.25	0.000108	0.01	1
20120	XM_021967060.1	LOC110764138	XP_021822752.1	635	dynamin-related protein 4C-like isoform X2	2.6	4.19	18.27	0.000654	0.05	1
20121	XM_021967058.1	LOC110764137	XP_021822750.1	635	dynamin-related protein 4C-like	4.33	4.24	18.87	5.66e-06	0.00115	0.17
20264	XM_021967236.1	LOC110764309	XP_021822928.1	769	CSC1-like protein At3g21620 isoform X1	2.95	-3.96	-15.57	0.000292	0.03	1
20376	XM_021967290.1	LOC110764344	XP_021822982.1	237	NAC domain-containing protein 41	25.42	2.79	6.91	4.39e-06	0.000941	0.13
20480	XM_021967464.1	LOC110764477	XP_021823156.1	1293	DNA ligase 6-like isoform X2	0.95	-5.88	-58.99	0.000583	0.04	1
20578	XM_021967583.1	LOC110764582	XP_021823275.1	150	MLP-like protein 328	471.56	-2.22	-4.67	0.000124	0.01	1
20695	XM_021967783.1	LOC110764762	XP_021823475.1	277	expansin-B15-like	8.24	-3.75	-13.46	0.000189	0.02	1
21112	XM_021968160.1	LOC110765104	XP_021823852.1	215	glutathione S-transferase F11-like	24.8	7.4	169.26	1.03e-09	7.47e-07	3.17e-05
21186	XM_021968249.1	LOC110765180	XP_021823941.1	393	WAT1-related protein At5g07050	3.82	4.02	16.27	0.000113	0.01	1
21248	XM_021968316.1	LOC110765229	XP_021824008.1	562	rust resistance kinase Lr10-like	10.74	-3.98	-15.73	8e-05	0.00979	1
21269	XM_021968346.1	LOC110765262	XP_021824038.1	1005	probable leucine-rich repeat receptor-like serine/threonine-protein kinase At3g14840	85.97	-2.27	-4.82	8.21e-10	6.39e-07	2.52e-05
21341	XM_021968465.1	LOC110765355	XP_021824157.1	532	F-box protein At5g03970-like	50.94	-1.68	-3.21	1.16e-05	0.00203	0.36
21378	XM_021968464.1	LOC110765354	XP_021824156.1	589	uncharacterized protein LOC110765354	59.07	2.09	4.27	9.21e-06	0.00171	0.28
21423	XM_021968604.1	LOC110765466	XP_021824296.1	302	uncharacterized protein LOC110765466	8.01	3.44	10.82	0.000132	0.01	1
21439	XM_021968595.1	LOC110765460	XP_021824287.1	536	protein DETOXIFICATION 12-like	40.26	2.08	4.24	6.13e-08	2.93e-05	0.00188
21452	XM_021968505.1	LOC110765388	XP_021824197.1	190	uncharacterized protein LOC110765388	145.05	2.65	6.26	7.04e-09	4.33e-06	0.000216
21707	XM_021969037.1	LOC110765799	XP_021824729.1	205	uncharacterized protein LOC110765799	25.73	-3.39	-10.46	0.000155	0.02	1
21739	XM_021968790.1	LOC110765625	XP_021824482.1	513	cytochrome P450 98A2-like isoform X1	315.56	3.14	8.8	5.58e-10	4.49e-07	1.71e-05
21740	XM_021968793.1	LOC110765626	XP_021824485.1	512	cytochrome P450 98A2-like isoform X2	11.42	3.92	15.09	0.000706	0.05	1
21741	XM_021968792.1	LOC110765626	XP_021824484.1	513	cytochrome P450 98A2-like isoform X1	76.56	3.09	8.51	0.000321	0.03	1
21743	XM_021968795.1	LOC110765628	XP_021824487.1	508	cytochrome P450 98A2-like	137.96	1.42	2.68	0.000207	0.02	1
21981	XM_021969097.1	LOC110765854	XP_021824789.1	292	UDP-xylose transporter 2-like isoform X2	6.98	4.46	22.08	1.82e-05	0.003	0.56
21998	XM_021969177.1	LOC110765932	XP_021824869.1	503	protein DETOXIFICATION 41-like	56.93	1.84	3.57	9.17e-07	0.000255	0.03
22005	XM_021969203.1	LOC110765953	XP_021824895.1	364	uncharacterized oxidoreductase At1g06690, chloroplastic	87.08	1.62	3.08	0.000202	0.02	1
22252	XM_021969438.1	LOC110766156	XP_021825130.1	253	sulfate transporter 3.1-like isoform X2	7.03	8.44	348.02	0.000505	0.04	1
22311	XM_021969505.1	LOC110766216	XP_021825197.1	577	transcription factor MYB3R-3-like isoform X2	1.89	5.54	46.63	0.000346	0.03	1
22333	XM_021969532.1	LOC110766237	XP_021825224.1	1214	uncharacterized protein LOC110766237 isoform X3	1.83	3.83	14.24	0.000319	0.03	1
22386	XM_021969603.1	LOC110766304	XP_021825295.1	731	uncharacterized protein LOC110766304 isoform X2	2.1	5.25	38.14	1.02e-05	0.00183	0.31
22430	XM_021969627.1	LOC110766324	XP_021825319.1	904	E3 ubiquitin-protein ligase HOS1 isoform X2	1.77	4.89	29.64	4.09e-06	0.000902	0.13
22562	XM_021969780.1	LOC110766447	XP_021825472.1	586	TMV resistance protein N-like isoform X2	59	1.53	2.89	0.00018	0.02	1
22567	XM_021969782.1	LOC110766449	XP_021825474.1	277	toll/interleukin-1 receptor-like protein	18.37	2.33	5.01	0.00014	0.01	1
22754	XM_021969940.1	LOC110766585	XP_021825632.1	1158	LRR receptor-like serine/threonine-protein kinase FLS2	31.8	-1.89	-3.72	5.49e-06	0.00113	0.17
22854	XM_021970132.1	LOC110766769	XP_021825824.1	255	stem-specific protein TSJT1-like	182.69	-1.68	-3.21	2.36e-05	0.00363	0.72
22911	XM_021970205.1	LOC110766817	XP_021825897.1	293	uncharacterized protein LOC110766817	33.19	-4.92	-30.38	5.38e-12	9.68e-09	1.65e-07
22914	XM_021970201.1	LOC110766812	XP_021825893.1	186	transcription factor bHLH162	18.26	-2.99	-7.95	0.000359	0.03	1
22915	XM_021970202.1	LOC110766812	XP_021825894.1	186	transcription factor bHLH162	17.4	-3.34	-10.11	0.000402	0.03	1
23015	XM_021970283.1	LOC110766882	XP_021825975.1	862	probable alpha,alpha-trehalose-phosphate synthase UDP-forming; 9	22.96	-2.08	-4.24	1.3e-05	0.00224	0.4
23016	XM_021970284.1	LOC110766882	XP_021825976.1	862	probable alpha,alpha-trehalose-phosphate synthase UDP-forming; 9	20.91	-1.98	-3.93	0.000128	0.01	1
23095	XM_021970346.1	LOC110766926	XP_021826038.1	1643	protein MODIFIER OF SNC1 1 isoform X2	4.64	3.36	10.25	3.95e-05	0.0056	1
23185	XM_021970436.1	LOC110767017	XP_021826128.1	786	serine/threonine-protein kinase-like protein CCR4	25.93	3.98	15.78	2.11e-10	1.89e-07	6.46e-06
23370	XM_021970692.1	LOC110767216	XP_021826384.1	533	uncharacterized protein LOC110767216	5.16	3.88	14.76	1.51e-06	0.000383	0.05
23480	XM_021970800.1	LOC110767296	XP_021826492.1	520	uncharacterized protein LOC110767296	11.82	2.14	4.4	7.97e-05	0.00979	1
23486	XM_021970745.1	LOC110767257	XP_021826437.1	536	probable WRKY transcription factor 33	95.02	2.88	7.36	8.98e-12	1.4e-08	2.76e-07
23688	XM_021971038.1	LOC110767486	XP_021826730.1	704	ABC transporter G family member 11-like	184.68	3.23	9.36	2.14e-11	2.63e-08	6.56e-07
23761	XM_021971102.1	LOC110767531	XP_021826794.1	460	probable amino acid permease 7 isoform X2	26.73	1.5	2.82	0.000684	0.05	1
23764	XM_021971105.1	LOC110767531	XP_021826797.1	460	probable amino acid permease 7 isoform X2	25.97	1.61	3.04	0.000184	0.02	1
23841	XM_021971179.1	LOC110767596	XP_021826871.1	234	dehydration-responsive element-binding protein 1A-like	37.36	2.5	5.67	2.79e-05	0.00419	0.86
24001	XM_021971321.1	LOC110767700	XP_021827013.1	703	heat shock protein 83	272.75	-2.8	-6.95	9.74e-05	0.01	1
24040	XM_021971224.1	LOC110767634	XP_021826916.1	863	G-type lectin S-receptor-like serine/threonine-protein kinase At5g24080	2.44	-3.12	-8.68	0.000129	0.01	1
24060	XM_021971176.1	LOC110767592	XP_021826868.1	1478	ABC transporter C family member 10-like	42.95	2.16	4.46	6.78e-08	3.05e-05	0.00208
24277	XM_021971700.1	LOC110768020	XP_021827392.1	127	uncharacterized protein LOC110768020	30.03	2.92	7.58	7.55e-05	0.00939	1
24301	XM_021971728.1	LOC110768049	XP_021827420.1	479	abscisic acid 8'-hydroxylase 1-like	198.12	3.83	14.24	2.99e-18	1.17e-14	9.19e-14
24484	XM_021971925.1	LOC110768223	XP_021827617.1	1102	sister chromatid cohesion 1 protein 4 isoform X2	3.64	6.27	77.08	5.11e-05	0.00686	1
24581	XM_021972044.1	LOC110768326	XP_021827736.1	965	pentatricopeptide repeat-containing protein At3g02330, mitochondrial isoform X5	3.83	-2.48	-5.6	0.000466	0.04	1
24676	XM_021972144.1	LOC110768416	XP_021827836.1	1075	receptor-like protein 12	6.87	-3.04	-8.21	2.49e-05	0.00378	0.76
24679	XM_021972155.1	LOC110768428	XP_021827847.1	1042	receptor like protein 30-like	17.37	-3.23	-9.37	1.93e-06	0.000465	0.06
24743	XM_021972237.1	LOC110768491	XP_021827929.1	479	AAA-ATPase At3g50940-like	11.11	-2.06	-4.18	0.000578	0.04	1
24832	XM_021972318.1	LOC110768552	XP_021828010.1	700	probable xyloglucan glycosyltransferase 12	146.73	1.83	3.55	8.71e-06	0.00163	0.27
25003	XM_021972499.1	LOC110768671	XP_021828191.1	1107	TMV resistance protein N-like isoform X2	4.34	2.96	7.78	2.95e-05	0.0044	0.91
25053	XM_021972575.1	LOC110768734	XP_021828267.1	356	zinc transporter 8-like isoform X1	294.65	-2.34	-5.08	1.4e-07	5.18e-05	0.00428
25090	XM_021972606.1	LOC110768758	XP_021828298.1	561	(3S,6E)-nerolidol synthase 1-like isoform X2	6.8	-3.48	-11.19	0.00032	0.03	1
25097	XM_021972616.1	LOC110768767	XP_021828308.1	338	anthocyanidin reductase ((2S)-flavan-3-ol-forming)	174.48	2.62	6.15	7.85e-06	0.0015	0.24
25161	XM_021972682.1	LOC110768823	XP_021828374.1	524	glucose-1-phosphate adenylyltransferase large subunit 1-like	460.66	1.43	2.7	0.000717	0.05	1
25228	XM_021972760.1	LOC110768888	XP_021828452.1	749	inter alpha-trypsin inhibitor, heavy chain 4	24.44	-1.87	-3.67	9.47e-05	0.01	1
25545	XM_021973109.1	LOC110769177	XP_021828801.1	667	protein RRP6-like 2 isoform X3	2.39	8.72	420.88	0.000247	0.02	1
25644	XM_021973198.1	LOC110769261	XP_021828890.1	216	transcription factor TCP9	22.34	2.79	6.91	0.000114	0.01	1
25699	XM_021973298.1	LOC110769349	XP_021828990.1	239	peroxygenase-like	63.57	2.28	4.85	0.000116	0.01	1
25773	XM_021973364.1	LOC110769402	XP_021829056.1	323	mitochondrial uncoupling protein 4-like	37.76	4.27	19.33	4.04e-10	3.5e-07	1.24e-05
26148	XM_021973770.1	LOC110769744	XP_021829462.1	373	ATP synthase gamma chain, chloroplastic-like	32.19	1.82	3.53	5.64e-05	0.00754	1
26230	XM_021973890.1	LOC110769850	XP_021829582.1	154	uncharacterized protein LOC110769850	191.4	-2.11	-4.31	3.59e-08	1.91e-05	0.0011
26259	XM_021973956.1	LOC110769899	XP_021829648.1	301	inositol oxygenase 1-like	67.77	1.64	3.11	0.000107	0.01	1
26278	XM_021973970.1	LOC110769916	XP_021829662.1	179	jacalin-related lectin 19	19.16	3.96	15.53	5.7e-05	0.00755	1
26418	XM_021974078.1	LOC110770006	XP_021829770.1	715	scarecrow-like protein 14 isoform X1	29.7	1.52	2.87	0.000246	0.02	1
26551	XM_021974228.1	LOC110770143	XP_021829920.1	1111	TMV resistance protein N-like isoform X2	3.32	4.6	24.28	3.8e-05	0.00551	1
26580	XM_021974274.1	LOC110770187	XP_021829966.1	240	B-box zinc finger protein 21-like	10.81	2.72	6.6	0.000169	0.02	1
26874	XM_021974586.1	LOC110770448	XP_021830278.1	942	disease resistance protein RPM1-like	4.95	3.5	11.32	1.79e-05	0.00299	0.55
26889	XM_021974616.1	LOC110770476	XP_021830308.1	453	omega-3 fatty acid desaturase, chloroplastic-like	72.35	-1.88	-3.68	0.000116	0.01	1
27448	XM_021975232.1	LOC110771007	XP_021830924.1	448	U-box domain-containing protein 21	50.96	3.4	10.58	1.05e-09	7.47e-07	3.24e-05
27486	XM_021975269.1	LOC110771031	XP_021830961.1	2741	uncharacterized protein LOC110771031 isoform X1	1.47	6.35	81.41	6.23e-07	0.000182	0.02
27492	XM_021975285.1	LOC110771050	XP_021830977.1	373	rust resistance kinase Lr10-like	40.89	-2.05	-4.15	0.000316	0.03	1
27493	XM_021975286.1	LOC110771051	XP_021830978.1	352	uncharacterized protein LOC110771051	21.65	-2.28	-4.85	0.000715	0.05	1
27634	XM_021975439.1	LOC110771185	XP_021831131.1	1147	disease resistance protein RML1A-like	27.07	-1.59	-3	0.000323	0.03	1
27766	XM_021975595.1	LOC110771316	XP_021831287.1	578	70 kDa peptidyl-prolyl isomerase-like	104.88	-2.41	-5.32	3.83e-05	0.00552	1
28019	XM_021975856.1	LOC110771543	XP_021831548.1	542	cytokinin dehydrogenase 5	26.87	-2.76	-6.79	6.74e-08	3.05e-05	0.00207
28731	XM_021976653.1	LOC110772231	XP_021832345.1	479	UDP-glycosyltransferase 88F5-like	30.35	2.19	4.55	1.68e-06	0.000419	0.05
28863	XM_021976817.1	LOC110772380	XP_021832509.1	1308	probable leucine-rich repeat receptor-like protein kinase At1g35710	6.93	-4.4	-21.07	2.36e-07	7.72e-05	0.00726
28954	XM_021976920.1	LOC110772480	XP_021832612.1	281	zinc finger protein ZAT10-like	98.02	2.27	4.84	8.73e-05	0.01	1
28982	XM_021976994.1	LOC110772557	XP_021832686.1	279	ethylene-responsive transcription factor ERF109-like	45.4	5.31	39.68	1.24e-18	5.79e-15	3.8e-14
29073	XM_021977055.1	LOC110772599	XP_021832747.1	1141	probable leucine-rich repeat receptor-like protein kinase At1g35710	4.96	-3.23	-9.41	9.17e-05	0.01	1
29172	XM_021977166.1	LOC110772708	XP_021832858.1	201	early light-induced protein 1, chloroplastic-like	37.98	4.03	16.31	2.3e-07	7.68e-05	0.00706
29174	XM_021977168.1	LOC110772710	XP_021832860.1	189	early light-induced protein 1, chloroplastic-like	63.87	6.55	93.89	2.6e-11	2.89e-08	7.98e-07
29175	XM_021977162.1	LOC110772705	XP_021832854.1	191	early light-induced protein 1, chloroplastic-like	337.09	5.7	51.94	1.24e-21	9.67e-18	3.81e-17
29177	XM_021977174.1	LOC110772715	XP_021832866.1	198	early light-induced protein 1, chloroplastic-like	67.18	2.93	7.62	4.15e-07	0.000129	0.01
29354	XM_021977361.1	LOC110772879	XP_021833053.1	232	glutathione S-transferase U17-like	146.04	1.73	3.31	0.000136	0.01	1
29997	XM_021978118.1	LOC110773593	XP_021833810.1	502	uncharacterized protein LOC110773593 isoform X2	3.45	9.86	929.69	9.93e-05	0.01	1
30073	XM_021978194.1	LOC110773674	XP_021833886.1	630	exocyst complex component EXO70H1-like	58.36	2.76	6.78	3.52e-06	0.0008	0.11
30283	XM_021978424.1	LOC110773918	XP_021834116.1	193	uncharacterized protein LOC110773918	12.52	3.1	8.57	0.00021	0.02	1
30342	XM_021978507.1	LOC110773991	XP_021834199.1	514	phospholipase A1-Igamma1, chloroplastic	34.91	2.37	5.16	9.87e-08	4.05e-05	0.00303
30380	XM_021978575.1	LOC110774051	XP_021834267.1	472	ornithine aminotransferase, mitochondrial	82.02	-1.4	-2.64	0.000697	0.05	1
30406	XM_021978529.1	LOC110774011	XP_021834221.1	676	LRR receptor-like serine/threonine-protein kinase EFR	23.51	-2.35	-5.09	0.000487	0.04	1
30486	XM_021978626.1	LOC110774096	XP_021834318.1	210	protein NDR1-like	101.05	2.14	4.41	1.53e-07	5.59e-05	0.0047
30561	XM_021978735.1	LOC110774194	XP_021834427.1	492	probable leucine-rich repeat receptor-like serine/threonine-protein kinase At3g14840	36.9	-1.43	-2.7	3.41e-05	0.00498	1
30566	XM_021978747.1	LOC110774202	XP_021834439.1	858	DExH-box ATP-dependent RNA helicase DExH1 isoform X2	2.61	9.24	606.24	0.000173	0.02	1
30880	XM_021979060.1	LOC110774518	XP_021834752.1	348	centromere protein O isoform X1	1.55	9.22	594.33	0.000692	0.05	1
30900	XM_021979073.1	LOC110774527	XP_021834765.1	411	probable sarcosine oxidase	5.58	2.85	7.22	0.000504	0.04	1
31148	XM_021944379.1	LOC110744413	XP_021800071.1	435	uncharacterized protein LOC110744413 isoform X2	15.01	2.87	7.3	4.33e-06	0.000938	0.13
31149	XM_021944378.1	LOC110744413	XP_021800070.1	435	uncharacterized protein LOC110744413 isoform X1	15.75	2.94	7.67	5.81e-06	0.00117	0.18
31293	XM_021944541.1	LOC110744547	XP_021800233.1	307	uncharacterized protein LOC110744547	170.26	1.29	2.45	0.000346	0.03	1
31305	XM_021944546.1	LOC110744554	XP_021800238.1	431	licodione synthase-like	43.43	2.58	5.97	0.00017	0.02	1
31316	XM_021944561.1	LOC110744572	XP_021800253.1	726	probable acyl-activating enzyme 18, peroxisomal	32.02	2.07	4.21	1.16e-05	0.00203	0.36
31419	XM_021944684.1	LOC110744696	XP_021800376.1	259	bidirectional sugar transporter SWEET1-like	31.55	2.28	4.87	0.000417	0.03	1
31494	XM_021944773.1	LOC110744765	XP_021800465.1	237	uncharacterized protein At3g49140-like isoform X5	17.89	7.35	163.3	3.99e-07	0.000126	0.01
31553	XM_021944862.1	LOC110744834	XP_021800554.1	478	ferrochelatase-2, chloroplastic	89.46	1.53	2.89	5.88e-05	0.00769	1
31599	XM_021944876.1	LOC110744850	XP_021800568.1	459	protein BIG GRAIN 1-like A	11.28	-4.3	-19.64	1.98e-05	0.00313	0.61
32075	XM_021945415.1	LOC110745336	XP_021801107.1	185	uncharacterized protein LOC110745336	102.18	1.33	2.51	0.000225	0.02	1
32122	XM_021945457.1	LOC110745380	XP_021801149.1	597	protein NRT1/ PTR FAMILY 7.3	3.79	5.44	43.34	2.69e-06	0.000629	0.08
32202	XM_021945558.1	LOC110745470	XP_021801250.1	199	uncharacterized protein LOC110745470	17.2	2.74	6.7	8.45e-05	0.01	1
32384	XM_021945761.1	LOC110745637	XP_021801453.1	316	tryptophan synthase alpha chain-like	3.22	-4.12	-17.34	0.000447	0.04	1
32418	XM_021945799.1	LOC110745680	XP_021801491.1	594	probable leucine-rich repeat receptor-like serine/threonine-protein kinase At3g14840	5.39	-2.31	-4.97	0.000496	0.04	1
32498	XM_021945898.1	LOC110745762	XP_021801590.1	253	expansin-A8-like	12.02	-4.85	-28.75	0.000325	0.03	1
32505	XM_021945896.1	LOC110745760	XP_021801588.1	430	LOW QUALITY PROTEIN: alpha-galactosidase 3	34.43	-1.79	-3.46	0.000419	0.03	1
32673	XM_021946088.1	LOC110745929	XP_021801780.1	556	(-)-alpha-pinene synthase-like	26.06	-3.95	-15.49	4.94e-06	0.00104	0.15
32725	XM_021946146.1	LOC110745967	XP_021801838.1	411	U-box domain-containing protein 28	15.04	2.35	5.08	0.000259	0.02	1
33560	XM_021947097.1	LOC110746869	XP_021802789.1	266	NDR1/HIN1-like protein 13	145.32	2.34	5.06	5.5e-06	0.00113	0.17
33716	XM_021947273.1	LOC110747066	XP_021802965.1	279.333	polyketide synthase 5; frame=3	1007.61	3.35	10.19	8.6e-07	0.000242	0.03
33848	XM_021947428.1	LOC110747224	XP_021803120.1	946	glutamate receptor 2.7-like isoform X1	6.93	1.96	3.88	0.000317	0.03	1
33849	XM_021947429.1	LOC110747224	XP_021803121.1	946	glutamate receptor 2.7-like isoform X1	7.08	1.86	3.64	0.000231	0.02	1
33850	XM_021947430.1	LOC110747224	XP_021803122.1	946	glutamate receptor 2.7-like isoform X2	7.54	1.95	3.88	0.000172	0.02	1
33901	XM_021947486.1	LOC110747289	XP_021803178.1	898	receptor-like protein kinase FERONIA	42.73	-1.59	-3.01	0.000261	0.02	1
34028	XM_021947632.1	LOC110747459	XP_021803324.1	193	TMV resistance protein N-like	34.79	2.07	4.19	2.19e-05	0.00342	0.67
34105	XM_021947716.1	LOC110747564	XP_021803408.1	142	uncharacterized protein LOC110747564	20.22	2.9	7.48	0.000106	0.01	1
34221	XM_021947853.1	LOC110747739	XP_021803545.1	280.333	putative receptor-like protein kinase At3g47110	9.33	-3.68	-12.81	7.87e-05	0.00974	1
34908	XM_021948624.1	LOC110748671	XP_021804316.1	530	phenylalanine ammonia-lyase 1	187.28	2.58	5.99	1.04e-05	0.00186	0.32

## Sheet: S8_distal_11116_b1
Supplementary Table S8. The differentially expressed genes from the distal samples of sweet cherry inoculated with Pss strain 11116_b1.
No. protein	Gene	Gene ID (LOC)	Protein ID	Size (aa)	Description	Max group mean	Log₂ fold change	Fold change	P-value	FDR p-value	Bonferroni
15	XM_021969064.1	LOC110762897	XP_021824756.1	404	ethylene-responsive transcription factor ERF110-like	7.73	-5.02	-32.46	1.13e-08	5.42e-06	0.000346
117	XM_021956374.1	LOC110755169	XP_021812066.1	338	carbonic anhydrase 2-like isoform X1	4.59	-3.93	-15.28	0.000414	0.03	1
193	XM_021966491.1	LOC110763632	XP_021822183.1	664	xyloglucan glycosyltransferase 4	49.66	2.16	4.47	5.24e-07	0.000149	0.02
232	XM_021954634.1	LOC110753661	XP_021810326.1	376	probable galacturonosyltransferase-like 10	45.12	4.42	21.38	2.54e-11	2.4e-08	7.8e-07
271	XM_021974403.1	LOC110770086	XP_021830095.1	1783	uncharacterized protein LOC110770086 isoform X3	5.4	4.03	16.29	0.00028	0.02	1
315	XM_021978008.1	LOC110773456	XP_021833700.1	215	uncharacterized protein DDB_G0271670-like	248.57	-2.33	-5.03	0.000546	0.03	1
415	XM_021948911.1	LOC110748926	XP_021804603.1	478	amino acid transporter AVT1H	4.56	5.24	37.78	1.32e-05	0.0023	0.4
483	XM_021950770.1	LOC110750416	XP_021806462.1	1607	uncharacterized protein LOC110750416 isoform X4	1.78	-6.2	-73.43	5.48e-05	0.00677	1
587	XM_021951278.1	LOC110750880	XP_021806970.1	1463	uncharacterized protein LOC110750880 isoform X2	4.25	9.91	963.25	2.09e-10	1.53e-07	6.41e-06
748	XM_021952769.1	LOC110752153	XP_021808461.1	1558	protein GFS12 isoform X2	5.52	2.08	4.23	0.000308	0.02	1
784	XM_021953407.1	LOC110752691	XP_021809099.1	840	receptor-like protein kinase THESEUS 1	70.92	1.31	2.48	0.000144	0.01	1
822	XM_021953650.1	LOC110752889	XP_021809342.1	663	low affinity sulfate transporter 3	17.54	-3.26	-9.59	0.000465	0.03	1
896	XM_021954036.1	LOC110753196	XP_021809728.1	940	nitrate reductase NAD(P)H-like	39.63	2.2	4.59	6.06e-08	2.33e-05	0.00186
903	XM_021954086.1	LOC110753227	XP_021809778.1	805	oxysterol-binding protein-related protein 1C	88.05	1.64	3.12	2.36e-06	0.000553	0.07
944	XM_021954504.1	LOC110753571	XP_021810196.1	246	ethylene-responsive transcription factor ERF012-like	8.05	4.44	21.77	1.81e-05	0.00305	0.56
1103	XM_021957531.1	LOC110756135	XP_021813223.1	772	probable galactinol--sucrose galactosyltransferase 5	74.71	1.84	3.58	1.62e-05	0.00277	0.5
1384	XM_021959313.1	LOC110757629	XP_021815005.1	305	thaumatin-like protein 1b	9.96	-3.14	-8.84	0.000126	0.01	1
1625	XM_021962571.1	LOC110760318	XP_021818263.1	410	fasciclin-like arabinogalactan protein 1	98.95	1.89	3.71	0.000305	0.02	1
1655	XM_021963336.1	LOC110760966	XP_021819028.1	377	metalloendoproteinase 2-MMP	85.47	2.49	5.6	1.95e-05	0.00322	0.6
1656	XM_021963042.1	LOC110760729	XP_021818734.1	83	uncharacterized protein LOC110760729	65.5	3.19	9.15	1.46e-06	0.000371	0.04
1665	XM_021963323.1	LOC110760959	XP_021819015.1	390	probable galacturonosyltransferase-like 9	41.15	2.11	4.31	0.000151	0.01	1
1672	XM_021963383.1	LOC110761005	XP_021819075.1	613	glycosyltransferase family 92 protein RCOM_0530710	27.86	2.58	5.98	1.92e-06	0.000463	0.06
1760	XM_021963581.1	LOC110761145	XP_021819273.1	311	uncharacterized protein LOC110761145 isoform X2	2	5.66	50.4	0.000811	0.05	1
2120	XM_021968370.1	LOC110765280	XP_021824062.1	485	protein ALP1-like	66.33	-1.48	-2.79	0.000295	0.02	1
2138	XM_021967868.1	LOC110764833	XP_021823560.1	495	IQ domain-containing protein IQM1-like	166.2	2.09	4.24	3.69e-07	0.000112	0.01
2162	XM_021967669.1	LOC110764655	XP_021823361.1	659	probable leucine-rich repeat receptor-like protein kinase At1g68400	25.93	2.27	4.84	2.43e-06	0.000564	0.07
2163	XM_021967710.1	LOC110764697	XP_021823402.1	267	NDR1/HIN1-like protein 6	30.99	2.65	6.28	0.000175	0.02	1
2183	XM_021968533.1	LOC110765395	XP_021824225.1	941	glutamate receptor 2.8-like isoform X2	1.53	-7.93	-243.21	1.09e-05	0.00199	0.33
2323	XM_021970085.1	LOC110766707	XP_021825777.1	536	synaptotagmin-5 isoform X2	24.63	5.38	41.6	4.64e-06	0.000977	0.14
2425	XM_021971051.1	LOC110767497	XP_021826743.1	351	GATA transcription factor 8-like	100.64	2.13	4.37	6.19e-05	0.00726	1
2426	XM_021971057.1	LOC110767497	XP_021826749.1	351	GATA transcription factor 8-like	99.87	2.09	4.26	7.57e-05	0.00847	1
2427	XM_021971065.1	LOC110767497	XP_021826757.1	351	GATA transcription factor 8-like	101.45	2.17	4.51	2.47e-05	0.00393	0.76
2903	XM_021976508.1	LOC110772101	XP_021832200.1	369	peroxisomal (S)-2-hydroxy-acid oxidase GLO1 isoform X1	171.26	-1.28	-2.42	0.00061	0.04	1
2926	XM_021976779.1	LOC110772343	XP_021832471.1	627	9-cis-epoxycarotenoid dioxygenase NCED1, chloroplastic-like	35.07	1.84	3.59	8.48e-05	0.00922	1
3159	XM_021978932.1	LOC110774392	XP_021834624.1	602	pentatricopeptide repeat-containing protein At1g62914, mitochondrial-like isoform X2	1.67	5.99	63.54	0.000181	0.02	1
3250	XM_021944588.1	LOC110744578	XP_021800280.1	570	beta-amylase 2, chloroplastic-like isoform X4	2.48	4.26	19.17	0.000422	0.03	1
3377	XM_021946755.1	LOC110746508	XP_021802447.1	910	uncharacterized protein LOC110746508 isoform X3	16.3	3.06	8.33	5.97e-05	0.00718	1
3455	XM_021946988.1	LOC110746742	XP_021802680.1	1183	uncharacterized protein LOC110746742 isoform X2	1.76	6.97	125.8	0.000733	0.04	1
3497	XM_021947351.1	LOC110747142	XP_021803043.1	437	DNA-binding protein RHL1-like isoform X2	2.77	9.08	540.97	0.000733	0.04	1
3816	XM_021948923.1	LOC110748941	XP_021804615.1	1158	putative disease resistance RPP13-like protein 1 isoform X2	0.82	4.99	31.7	0.000809	0.05	1
3834	XM_021948968.1	LOC110748978	XP_021804660.1	379	early nodulin-75-like	35.34	-2.15	-4.45	5.81e-05	0.00706	1
4028	XM_021949364.1	LOC110749291	XP_021805056.1	549	IQ domain-containing protein IQM1	53.22	2.8	6.98	6.15e-10	3.78e-07	1.89e-05
4043	XM_021949322.1	LOC110749251	XP_021805014.1	685	U-box domain-containing protein 34 isoform X2	3.01	5.28	38.98	0.000264	0.02	1
4045	XM_021949227.1	LOC110749186	XP_021804919.1	547	protein ALP1-like	316.98	3.06	8.33	3.63e-12	4.58e-09	1.11e-07
4143	XM_021949312.1	LOC110749245	XP_021805004.1	509	flavonoid 3'-monooxygenase-like	7.62	-3.71	-13.06	0.000491	0.03	1
4168	XM_021949318.1	LOC110749249	XP_021805010.1	215	ethylene-responsive transcription factor ERF017	12.27	3.29	9.78	2.63e-05	0.00412	0.81
4326	XM_021949498.1	LOC110749394	XP_021805190.1	319	ethylene-responsive transcription factor ERF071	37.09	1.68	3.21	0.000163	0.01	1
4366	XM_021949484.1	LOC110749384	XP_021805176.1	356	caffeoylshikimate esterase-like isoform X2	12.17	-5.25	-38	4.64e-05	0.00603	1
4368	XM_021949524.1	LOC110749414	XP_021805216.1	257	UDP-glucuronic acid decarboxylase 2-like	136.88	6.67	102.18	1.38e-07	5.06e-05	0.00424
4454	XM_021949637.1	LOC110749526	XP_021805329.1	273	protein SRC2 homolog isoform X2	123.32	1.84	3.57	7.02e-07	0.000197	0.02
4571	XM_021949683.1	LOC110749564	XP_021805375.1	223	small heat shock protein, chloroplastic-like	636.64	-1.81	-3.5	0.000346	0.03	1
4583	XM_021949830.1	LOC110749676	XP_021805522.1	219	homeobox-leucine zipper protein ATHB-12-like	148.17	-2.35	-5.12	0.000795	0.04	1
4594	XM_021949653.1	LOC110749543	XP_021805345.1	668	metal-nicotianamine transporter YSL3 isoform X2	0.92	6.83	113.46	0.000713	0.04	1
4595	XM_021949654.1	LOC110749543	XP_021805346.1	668	metal-nicotianamine transporter YSL3 isoform X2	1.33	7.52	184.05	0.000164	0.01	1
4596	XM_021949655.1	LOC110749543	XP_021805347.1	668	metal-nicotianamine transporter YSL3 isoform X2	0.99	7.24	151.32	0.000345	0.03	1
4604	XM_021949664.1	LOC110749549	XP_021805356.1	2059	MAG2-interacting protein 2 isoform X2	2.51	10.28	1241.51	4.63e-05	0.00603	1
4719	XM_021949890.1	LOC110749724	XP_021805582.1	678	zinc finger CCCH domain-containing protein 29-like	867.6	2.56	5.89	2.03e-11	2.09e-08	6.22e-07
4720	XM_021949882.1	LOC110749717	XP_021805574.1	358	probable 2-oxoglutarate-dependent dioxygenase At5g05600	6.03	-3.64	-12.48	4.31e-05	0.00591	1
4813	XM_021950068.1	LOC110749865	XP_021805760.1	454	protein trichome birefringence-like 10	27.06	-1.86	-3.64	4.36e-05	0.00591	1
4876	XM_021950095.1	LOC110749892	XP_021805787.1	917	DNA gyrase subunit A, chloroplastic/mitochondrial isoform X3	2.5	5.44	43.43	6.13e-05	0.00725	1
4944	XM_021950204.1	LOC110749973	XP_021805896.1	549	zinc finger CCCH domain-containing protein 18 isoform X6	3.51	-4.53	-23.09	0.000249	0.02	1
5004	XM_021950252.1	LOC110750010	XP_021805944.1	731	uncharacterized protein LOC110750010 isoform X2	2.37	-3.13	-8.74	0.000241	0.02	1
5165	XM_021950415.1	LOC110750142	XP_021806107.1	271	NAC domain-containing protein 90	42.94	1.81	3.52	0.000908	0.05	1
5209	XM_021950503.1	LOC110750214	XP_021806195.1	461	xyloglucan 6-xylosyltransferase 2-like	173.84	1.84	3.58	7.41e-05	0.0084	1
5268	XM_021950563.1	LOC110750264	XP_021806255.1	308	RING-H2 finger protein ATL2-like	214.47	3.24	9.42	3.39e-07	0.000106	0.01
5490	XM_021950793.1	LOC110750454	XP_021806485.1	432	glutamine synthetase leaf isozyme, chloroplastic	31.88	-2.36	-5.12	1.55e-07	5.5e-05	0.00475
5527	XM_021950767.1	LOC110750430	XP_021806459.1	424	basic 7S globulin-like	12.5	-5.18	-36.36	1.62e-06	0.0004	0.05
5721	XM_021951045.1	LOC110750687	XP_021806737.1	465	ethylene-responsive transcription factor ABR1-like	32.64	-3.75	-13.47	6.4e-19	7.28e-15	1.97e-14
5738	XM_021951055.1	LOC110750697	XP_021806747.1	453	tryptophan aminotransferase-related protein 4-like isoform X2	5.48	-6.61	-97.73	0.000118	0.01	1
5864	XM_021951151.1	LOC110750785	XP_021806843.1	463	ATP-dependent RNA helicase DBP2-like isoform X2	3.1	6.27	77.37	0.000842	0.05	1
5872	XM_021951146.1	LOC110750782	XP_021806838.1	910	B3 domain-containing transcription repressor VAL2 isoform X2	3.02	9.15	568.74	0.000789	0.04	1
5924	XM_021951233.1	LOC110750857	XP_021806925.1	569	beta-amylase 1, chloroplastic isoform X1	982.92	1.96	3.88	0.000489	0.03	1
5975	XM_021951256.1	LOC110750878	XP_021806948.1	336	ubiquinol oxidase, mitochondrial-like	66.01	3.34	10.11	2.45e-08	1.07e-05	0.000751
6004	XM_021951496.1	LOC110751077	XP_021807188.1	725	leucine-rich repeat extensin-like protein 4 isoform X1	52.3	2.13	4.37	9.48e-05	0.01	1
6005	XM_021951497.1	LOC110751077	XP_021807189.1	725	leucine-rich repeat extensin-like protein 4 isoform X2	58.29	2.29	4.89	2.15e-05	0.00349	0.66
6171	XM_021951442.1	LOC110751022	XP_021807134.1	1256	uncharacterized protein LOC110751022	120.01	1.94	3.84	3.62e-08	1.52e-05	0.00111
6227	XM_021951376.1	LOC110750976	XP_021807068.1	1532	nascent polypeptide-associated complex subunit alpha, muscle-specific form-like isoform X4	0.97	-6.03	-65.4	0.000777	0.04	1
6545	XM_021951926.1	LOC110751453	XP_021807618.1	150	MLP-like protein 328	8.56	-5.13	-35.03	9.3e-05	0.00992	1
6603	XM_021952030.1	LOC110751548	XP_021807722.1	654	probable ADP-ribosylation factor GTPase-activating protein AGD14 isoform X2	2.01	-6.19	-72.77	3.53e-05	0.00515	1
6614	XM_021952015.1	LOC110751540	XP_021807707.1	216	uncharacterized protein LOC110751540	216.01	6.57	95.25	1.35e-08	6.15e-06	0.000416
6686	XM_021952108.1	LOC110751607	XP_021807800.1	231	ethylene-responsive transcription factor 3	133.03	2.63	6.19	0.000489	0.03	1
6802	XM_021952331.1	LOC110751810	XP_021808023.1	357	probable WRKY transcription factor 46	184.07	2.04	4.11	7.7e-06	0.00147	0.24
6841	XM_021952305.1	LOC110751791	XP_021807997.1	1236	BAG family molecular chaperone regulator 6	111.03	-2.04	-4.12	0.000411	0.03	1
6862	XM_021952257.1	LOC110751748	XP_021807949.1	231	probable E3 ubiquitin-protein ligase ZFP1 isoform X5	18.21	9.47	707.09	0.000222	0.02	1
6875	XM_021952283.1	LOC110751775	XP_021807975.1	447	delta(8)-fatty-acid desaturase 1-like	75	1.29	2.44	0.000352	0.03	1
6876	XM_021952284.1	LOC110751775	XP_021807976.1	447	delta(8)-fatty-acid desaturase 1-like	76.91	1.3	2.46	0.000194	0.02	1
6954	XM_021952563.1	LOC110751992	XP_021808255.1	332	protein EXORDIUM-like	366.07	4.21	18.51	3.33e-16	7.56e-13	1.02e-11
6955	XM_021952515.1	LOC110751946	XP_021808207.1	332	protein EXORDIUM-like isoform X2	368.14	4.1	17.15	5e-17	1.89e-13	1.53e-12
6956	XM_021952514.1	LOC110751946	XP_021808206.1	332	protein EXORDIUM-like isoform X1	186.64	4.02	16.28	1.55e-16	4.29e-13	4.76e-12
6957	XM_021952516.1	LOC110751947	XP_021808208.1	319	protein EXORDIUM-like	194.54	3.95	15.43	1.7e-16	4.29e-13	5.22e-12
6984	XM_021952471.1	LOC110751918	XP_021808163.1	167	uncharacterized protein LOC110751918	51.48	3.18	9.05	1.23e-06	0.000324	0.04
7078	XM_021952474.1	LOC110751921	XP_021808166.1	319	mitochondrial uncoupling protein 5-like	751.85	4.47	22.13	9.75e-12	1.11e-08	2.99e-07
7109	XM_021952416.1	LOC110751888	XP_021808108.1	445	MADS-box protein JOINTLESS-like isoform X4	204.99	4.3	19.64	4.75e-05	0.00608	1
7187	XM_021952668.1	LOC110752079	XP_021808360.1	597	protein NRT1/ PTR FAMILY 2.11-like	227.1	-1.88	-3.69	0.000152	0.01	1
7313	XM_021952809.1	LOC110752209	XP_021808501.1	732	G-type lectin S-receptor-like serine/threonine-protein kinase At4g27290 isoform X3	2.35	8.16	285.17	0.000926	0.05	1
7352	XM_021952855.1	LOC110752241	XP_021808547.1	286	probable CCR4-associated factor 1 homolog 11	260.06	3.92	15.13	2.16e-11	2.13e-08	6.63e-07
7575	XM_021953091.1	LOC110752437	XP_021808783.1	176	uncharacterized protein LOC110752437	45.04	2.56	5.9	9.9e-05	0.01	1
7580	XM_021953086.1	LOC110752434	XP_021808778.1	1074	inositol hexakisphosphate and diphosphoinositol-pentakisphosphate kinase VIP1-like isoform X1	1.68	-5.26	-38.21	0.000522	0.03	1
7595	XM_021953131.1	LOC110752466	XP_021808823.1	517	AAA-ATPase ASD, mitochondrial-like	26.02	1.97	3.92	2.42e-05	0.00388	0.74
7646	XM_021953187.1	LOC110752514	XP_021808879.1	534	(R)-mandelonitrile lyase 1-like isoform X2	2.16	4.16	17.85	0.000627	0.04	1
7690	XM_021953234.1	LOC110752550	XP_021808926.1	296	probable xyloglucan endotransglucosylase/hydrolase protein 23	89.78	3.05	8.26	2.49e-09	1.32e-06	7.64e-05
7753	XM_021953322.1	LOC110752621	XP_021809014.1	757	protein ENHANCED DISEASE RESISTANCE 2-like isoform X1	1.32	4.92	30.36	0.000386	0.03	1
7788	XM_021953333.1	LOC110752628	XP_021809025.1	216	late embryogenesis abundant protein At1g64065-like	18.25	2.91	7.49	0.000173	0.02	1
7820	XM_021953388.1	LOC110752675	XP_021809080.1	1143	uncharacterized protein LOC110752675 isoform X1	2.2	3.75	13.5	4.47e-05	0.00599	1
7935	XM_021953490.1	LOC110752764	XP_021809182.1	370	mitogen-activated protein kinase 3	263.88	1.39	2.63	5.47e-05	0.00677	1
8076	XM_021953649.1	LOC110752892	XP_021809341.1	589	(3S,6E)-nerolidol synthase 1-like	12.37	-3.11	-8.63	1.25e-08	5.78e-06	0.000383
8105	XM_021953667.1	LOC110752910	XP_021809359.1	680	protein LNK1 isoform X1	3.17	-3.63	-12.38	0.000161	0.01	1
8107	XM_021953669.1	LOC110752910	XP_021809361.1	673	protein LNK1 isoform X3	2.41	8.53	369.54	0.000703	0.04	1
8109	XM_021953693.1	LOC110752929	XP_021809385.1	475	TMV resistance protein N-like	37.61	1.49	2.8	7.74e-05	0.00858	1
8112	XM_021953798.1	LOC110753005	XP_021809490.1	812	probable disease resistance protein At5g66900 isoform X2	138.81	3.8	13.92	6.58e-17	2.14e-13	2.02e-12
8194	XM_021953745.1	LOC110752961	XP_021809437.1	159	uncharacterized protein LOC110752961	9.78	3.73	13.3	0.000306	0.02	1
8272	XM_021953876.1	LOC110753068	XP_021809568.1	201	lysine-rich arabinogalactan protein 18	151.86	2.09	4.24	1.1e-05	0.002	0.34
8300	XM_021953913.1	LOC110753102	XP_021809605.1	500	geraniol 8-hydroxylase-like	93.63	-1.48	-2.79	0.000205	0.02	1
8444	XM_021954000.1	LOC110753174	XP_021809692.1	312	uncharacterized protein LOC110753174	49.61	2.23	4.71	0.000289	0.02	1
8675	XM_021954384.1	LOC110753472	XP_021810076.1	315	probable xyloglucan endotransglucosylase/hydrolase protein 23	35.23	2.79	6.92	6.76e-06	0.00135	0.21
8704	XM_021954347.1	LOC110753437	XP_021810039.1	710	NADPH--cytochrome P450 reductase 2	110.17	1.52	2.86	0.000227	0.02	1
8742	XM_021954392.1	LOC110753488	XP_021810084.1	284	probable aquaporin PIP2-5	19.84	-1.99	-3.98	0.000894	0.05	1
8994	XM_021954704.1	LOC110753748	XP_021810396.1	952	MDIS1-interacting receptor like kinase 2-like	14.76	-2.32	-4.98	3.81e-06	0.000824	0.12
9011	XM_021954722.1	LOC110753764	XP_021810414.1	707	subtilisin-like protease SBT1.6; frame=3	216.97	1.68	3.21	0.000394	0.03	1
9315	XM_021955013.1	LOC110754025	XP_021810705.1	395	high mobility group B protein 15	9.9	-3.26	-9.61	0.000214	0.02	1
9340	XM_021955147.1	LOC110754122	XP_021810839.1	426	protein SAR DEFICIENT 1 isoform X2	6.64	6.23	74.84	0.000194	0.02	1
9423	XM_021955079.1	LOC110754077	XP_021810771.1	356	leucoanthocyanidin reductase-like isoform X2	2.51	4.08	16.86	0.000372	0.03	1
9424	XM_021955080.1	LOC110754077	XP_021810772.1	356	leucoanthocyanidin reductase-like isoform X2	3.38	3.56	11.83	0.000682	0.04	1
9473	XM_021955221.1	LOC110754186	XP_021810913.1	1223	TMV resistance protein N-like isoform X2	10.41	-2.21	-4.63	4.06e-05	0.00569	1
9682	XM_021955444.1	LOC110754386	XP_021811136.1	220	photosynthetic NDH subunit of lumenal location 3, chloroplastic	20.44	-2.25	-4.75	0.000519	0.03	1
9693	XM_021955441.1	LOC110754384	XP_021811133.1	584	scarecrow-like protein 21	144.74	1.72	3.29	4.29e-06	0.000919	0.13
9754	XM_021955531.1	LOC110754464	XP_021811223.1	618	probable terpene synthase 9	5.41	-2.96	-7.8	0.000671	0.04	1
9879	XM_021955732.1	LOC110754633	XP_021811424.1	341	UPF0496 protein 4-like	42.05	3.34	10.11	4.81e-06	0.001	0.15
10008	XM_021955786.1	LOC110754682	XP_021811478.1	350	protein EXORDIUM-like 5	247.36	2.82	7.04	5.94e-05	0.00718	1
10066	XM_021955862.1	LOC110754749	XP_021811554.1	427	probable serine/threonine-protein kinase PIX13 isoform X1	9.04	2.7	6.51	0.000102	0.01	1
10233	XM_021956031.1	LOC110754907	XP_021811723.1	285	xyloglucan endotransglucosylase/hydrolase 2-like	65	5.15	35.53	6.72e-18	3.89e-14	2.06e-13
10234	XM_021956030.1	LOC110754906	XP_021811722.1	287	xyloglucan endotransglucosylase/hydrolase 2-like	60.46	5.09	34.13	6.85e-18	3.89e-14	2.1e-13
10235	XM_021956032.1	LOC110754908	XP_021811724.1	279	xyloglucan endotransglucosylase/hydrolase 2-like	65.67	3.75	13.49	2.64e-11	2.4e-08	8.09e-07
10236	XM_021956033.1	LOC110754911	XP_021811725.1	288	xyloglucan endotransglucosylase/hydrolase 2-like	71.14	3.57	11.9	9.32e-11	7.31e-08	2.86e-06
10237	XM_021956036.1	LOC110754913	XP_021811728.1	282	xyloglucan endotransglucosylase/hydrolase 2-like	143.16	4.3	19.66	3.48e-17	1.58e-13	1.07e-12
10238	XM_021956034.1	LOC110754912	XP_021811726.1	285	xyloglucan endotransglucosylase/hydrolase 2-like	44.76	4.63	24.72	2.76e-14	4.83e-11	8.49e-10
10239	XM_021956035.1	LOC110754912	XP_021811727.1	285	xyloglucan endotransglucosylase/hydrolase 2-like	45.32	4.65	25.11	4.71e-11	3.96e-08	1.45e-06
10288	XM_021956128.1	LOC110754989	XP_021811820.1	170	uncharacterized protein LOC110754989	56.19	2.98	7.9	7.51e-05	0.00845	1
10289	XM_021956113.1	LOC110754977	XP_021811805.1	442	fasciclin-like arabinogalactan protein 17	85.13	1.85	3.6	0.000428	0.03	1
10309	XM_021956133.1	LOC110754993	XP_021811825.1	119	calcium-binding protein PBP1-like	174.73	3.58	11.99	2.33e-10	1.61e-07	7.16e-06
10360	XM_021956215.1	LOC110755060	XP_021811907.1	235	uncharacterized protein LOC110755060	92.15	1.9	3.73	0.000172	0.02	1
10366	XM_021956140.1	LOC110755002	XP_021811832.1	477	folate-biopterin transporter 1, chloroplastic isoform X2	4.22	4.31	19.79	0.000484	0.03	1
10470	XM_021956279.1	LOC110755115	XP_021811971.1	161	probable calcium-binding protein CML23	78.95	2.41	5.32	0.000105	0.01	1
10787	XM_021956654.1	LOC110755455	XP_021812346.1	577	protein NUCLEAR FUSION DEFECTIVE 4	29.25	-1.63	-3.1	0.000274	0.02	1
10921	XM_021956768.1	LOC110755541	XP_021812460.1	200	probable calcium-binding protein CML45	13.37	2.51	5.7	0.000693	0.04	1
11081	XM_021957064.1	LOC110755783	XP_021812756.1	397	probable protein phosphatase 2C 49	138.75	1.6	3.02	1.89e-05	0.00315	0.58
11622	XM_021957592.1	LOC110756192	XP_021813284.1	185	probable calcium-binding protein CML31	445.27	3.06	8.34	7.56e-11	6.13e-08	2.32e-06
11695	XM_021957676.1	LOC110756268	XP_021813368.1	1111	eIF-2-alpha kinase GCN2 isoform X2	4.6	9.42	682.68	1.04e-09	6.07e-07	3.2e-05
11806	XM_021957803.1	LOC110756381	XP_021813495.1	1043	exportin-4 isoform X2	5.38	10.74	1715.8	4.79e-05	0.00608	1
11890	XM_021957897.1	LOC110756458	XP_021813589.1	350	ethylene-responsive transcription factor 5-like	196.65	3.29	9.77	6.9e-06	0.00135	0.21
11943	XM_021958045.1	LOC110756601	XP_021813737.1	456	UDP-glycosyltransferase 76F1-like	20.26	2.11	4.32	0.00013	0.01	1
12025	XM_021957992.1	LOC110756548	XP_021813684.1	38	LOW QUALITY PROTEIN: uncharacterized protein LOC110756548	506.97	2.46	5.49	0.000655	0.04	1
12051	XM_021958118.1	LOC110756666	XP_021813810.1	303	uncharacterized protein LOC110756666	96.35	1.73	3.32	3.68e-06	0.000811	0.11
12333	XM_021958299.1	LOC110756830	XP_021813991.1	381	glycerate dehydrogenase-like	134.19	-1.48	-2.79	0.000651	0.04	1
12426	XM_021958554.1	LOC110757037	XP_021814246.1	463	probable glucan endo-1,3-beta-glucosidase A6	59.8	2.3	4.92	4.12e-05	0.00569	1
12451	XM_021958491.1	LOC110756983	XP_021814183.1	539	cytochrome P450 82G1-like	197.81	-2.13	-4.37	0.000606	0.04	1
12500	XM_021958579.1	LOC110757058	XP_021814271.1	556	(-)-alpha-pinene synthase-like isoform X2	116.64	-2.9	-7.45	9.22e-05	0.00989	1
12501	XM_021958578.1	LOC110757058	XP_021814270.1	557	(-)-alpha-pinene synthase-like isoform X1	14.63	-2.57	-5.92	0.000284	0.02	1
12533	XM_021958612.1	LOC110757080	XP_021814304.1	363	E3 ubiquitin-protein ligase RDUF2	209.52	2.96	7.81	1.59e-09	8.81e-07	4.88e-05
12538	XM_021958626.1	LOC110757091	XP_021814318.1	481	abscisic acid 8'-hydroxylase 2 isoform X1	2.93	-4.41	-21.22	0.000494	0.03	1
12617	XM_021958739.1	LOC110757178	XP_021814431.1	383	transcription factor HHO3-like	31.84	-1.89	-3.71	0.000246	0.02	1
12699	XM_021958803.1	LOC110757231	XP_021814495.1	356	malate dehydrogenase, glyoxysomal	45.84	-1.72	-3.3	0.000454	0.03	1
12855	XM_021959009.1	LOC110757417	XP_021814701.1	1011	TMV resistance protein N-like isoform X2	2.03	9	511.09	0.000894	0.05	1
13205	XM_021959310.1	LOC110757630	XP_021815002.1	537	3-ketoacyl-CoA synthase 1	37.36	2.07	4.2	0.000308	0.02	1
13295	XM_021959434.1	LOC110757732	XP_021815126.1	754	proline-rich receptor-like protein kinase PERK9	10.08	1.8	3.47	0.000828	0.05	1
13329	XM_021959497.1	LOC110757779	XP_021815189.1	687	trihelix transcription factor GTL1 isoform X2	11.68	4.53	23.05	4.05e-05	0.00569	1
13529	XM_021959775.1	LOC110758001	XP_021815467.1	351	uncharacterized protein LOC110758001	277.41	2.17	4.49	2.71e-07	8.67e-05	0.00832
13548	XM_021959706.1	LOC110757955	XP_021815398.1	179	F-box protein At1g61340-like	100.77	1.89	3.7	3.97e-05	0.00568	1
13580	XM_021959783.1	LOC110758010	XP_021815475.1	522	oxalate--CoA ligase	506.67	2.7	6.5	1.6e-07	5.61e-05	0.00493
13623	XM_021959824.1	LOC110758040	XP_021815516.1	220	uncharacterized protein LOC110758040	30.52	2.29	4.89	5.38e-05	0.00672	1
13750	XM_021959979.1	LOC110758172	XP_021815671.1	469	cyanogenic beta-glucosidase-like isoform X2	2.89	-6.14	-70.49	8.11e-05	0.00894	1
13882	XM_021960103.1	LOC110758279	XP_021815795.1	898	probable leucine-rich repeat receptor-like protein kinase At5g49770	17.69	-1.62	-3.07	6e-05	0.00718	1
14089	XM_021960351.1	LOC110758478	XP_021816043.1	299	transcription factor MYB44-like	150.68	3.16	8.94	7.95e-08	3.01e-05	0.00244
14172	XM_021960453.1	LOC110758567	XP_021816145.1	604	4-coumarate--CoA ligase 2-like	11.55	2.98	7.89	0.000386	0.03	1
14213	XM_021960506.1	LOC110758603	XP_021816198.1	1487	uncharacterized protein LOC110758603 isoform X5	15.53	1.58	2.99	0.000113	0.01	1
14323	XM_021960625.1	LOC110758710	XP_021816317.1	588	asparagine synthetase glutamine-hydrolyzing	35.26	-4.94	-30.7	5.67e-12	6.78e-09	1.74e-07
14326	XM_021960651.1	LOC110758734	XP_021816343.1	371	probable protein phosphatase 2C 25	172.84	2.22	4.65	1.48e-06	0.000371	0.05
14576	XM_021960861.1	LOC110758898	XP_021816553.1	420	glucan endo-1,3-beta-glucosidase 11	156.48	2.08	4.23	9.46e-05	0.01	1
14607	XM_021960910.1	LOC110758931	XP_021816602.1	722	uncharacterized protein LOC110758931 isoform X5	12.7	4.45	21.85	9.67e-05	0.01	1
14668	XM_021961033.1	LOC110759026	XP_021816725.1	588	lysine--tRNA ligase, chloroplastic/mitochondrial isoform X2	1.81	-9.42	-682.8	0.00051	0.03	1
14819	XM_021961188.1	LOC110759151	XP_021816880.1	233	NDR1/HIN1-like protein 3	308.68	1.98	3.95	3.52e-06	0.000784	0.11
14907	XM_021961241.1	LOC110759206	XP_021816933.1	197	protein SRC2-like	402.44	1.89	3.72	7.7e-06	0.00147	0.24
14944	XM_021961344.1	LOC110759291	XP_021817036.1	1009	FT-interacting protein 1-like	139.42	1.26	2.4	0.000396	0.03	1
15021	XM_021961402.1	LOC110759351	XP_021817094.1	178	BON1-associated protein 2-like	7.7	5.13	35.14	1.96e-05	0.00322	0.6
15022	XM_021961341.1	LOC110759287	XP_021817033.1	176	BON1-associated protein 2-like	31.77	3.8	13.92	1.11e-08	5.42e-06	0.00034
15055	XM_021961425.1	LOC110759369	XP_021817117.1	235	uncharacterized protein LOC110759369	30.1	2.14	4.4	0.000148	0.01	1
15082	XM_021961467.1	LOC110759422	XP_021817159.1	412	ACT domain-containing protein ACR10	72.33	1.28	2.43	0.00038	0.03	1
15085	XM_021961462.1	LOC110759416	XP_021817154.1	631	protein NUCLEAR FUSION DEFECTIVE 4-like	48.31	-1.44	-2.71	0.000605	0.04	1
15164	XM_021961537.1	LOC110759476	XP_021817229.1	605	probable LIM domain-containing serine/threonine-protein kinase DDB_G0286997	5.2	2.39	5.22	0.000846	0.05	1
15273	XM_021961680.1	LOC110759597	XP_021817372.1	373	phytosulfokine receptor 2	68.29	1.65	3.14	0.000262	0.02	1
15347	XM_021961888.1	LOC110759764	XP_021817580.1	545	cation/calcium exchanger 5	31.21	1.9	3.74	8.93e-05	0.00962	1
15359	XM_021961778.1	LOC110759683	XP_021817470.1	371	E3 ubiquitin-protein ligase ATL6-like	140.08	2.96	7.77	2.79e-07	8.8e-05	0.00855
15399	XM_021961703.1	LOC110759618	XP_021817395.1	337	uncharacterized protein LOC110759618	66.5	-1.41	-2.66	0.000416	0.03	1
15592	XM_021962067.1	LOC110759924	XP_021817759.1	537	DELLA protein DWARF8-like isoform X1	25.66	2.68	6.39	0.000257	0.02	1
15593	XM_021962068.1	LOC110759924	XP_021817760.1	537	DELLA protein DWARF8-like isoform X2	25.4	2.61	6.1	0.000319	0.02	1
15594	XM_021962069.1	LOC110759924	XP_021817761.1	537	DELLA protein DWARF8-like isoform X3	25.05	2.63	6.2	0.000268	0.02	1
15785	XM_021962251.1	LOC110760066	XP_021817943.1	510	probable E3 ubiquitin-protein ligase ARI7 isoform X2	3.38	4.21	18.45	0.00026	0.02	1
15967	XM_021962427.1	LOC110760198	XP_021818119.1	269	protein TIFY 9	41.86	-2.58	-6	2.08e-07	6.85e-05	0.00639
16006	XM_021962479.1	LOC110760243	XP_021818171.1	520	uncharacterized protein LOC110760243	65.15	1.94	3.85	0.000221	0.02	1
16007	XM_021962480.1	LOC110760243	XP_021818172.1	520	uncharacterized protein LOC110760243	66.34	1.95	3.87	0.000251	0.02	1
16033	XM_021962509.1	LOC110760268	XP_021818201.1	227	uncharacterized protein LOC110760268	24.88	3.99	15.89	4.93e-08	2e-05	0.00152
16048	XM_021962523.1	LOC110760279	XP_021818215.1	1055	protein GIGANTEA isoform X3	5.51	7.05	132.65	5.04e-07	0.000147	0.02
16304	XM_021962768.1	LOC110760494	XP_021818460.1	436	protein JINGUBANG	45.06	1.93	3.82	0.000433	0.03	1
16360	XM_021962862.1	LOC110760563	XP_021818554.1	447	elongation factor 1-alpha-like	51.57	-3.16	-8.96	1.12e-10	8.51e-08	3.45e-06
16424	XM_021962956.1	LOC110760656	XP_021818648.1	356	probable WRKY transcription factor 53	191.91	2.01	4.04	0.000634	0.04	1
16723	XM_021963285.1	LOC110760930	XP_021818977.1	412	uncharacterized protein LOC110760930 isoform X2	6.74	3.96	15.57	0.000144	0.01	1
16793	XM_021963387.1	LOC110761011	XP_021819079.1	239	zinc finger protein ZAT11-like	9.43	3.16	8.91	0.000339	0.02	1
16989	XM_021963621.1	LOC110761195	XP_021819313.1	1441	uncharacterized protein LOC110761195 isoform X3	0.98	4.48	22.25	0.000329	0.02	1
17211	XM_021963813.1	LOC110761350	XP_021819505.1	235	NEP1-interacting protein 1-like	33.79	2.58	5.97	5.44e-08	2.13e-05	0.00167
17247	XM_021963845.1	LOC110761380	XP_021819537.1	311	uncharacterized protein LOC110761380	3.86	-4.37	-20.66	0.000917	0.05	1
17418	XM_021964073.1	LOC110761579	XP_021819765.1	576	cysteine-rich receptor-like protein kinase 25 isoform X5	4.39	5.38	41.77	0.000112	0.01	1
17451	XM_021964088.1	LOC110761591	XP_021819780.1	316	BURP domain-containing protein 6-like	443.03	1.68	3.22	0.000419	0.03	1
17522	XM_021964255.1	LOC110761705	XP_021819947.1	787	subtilisin-like protease SBT1.5	66.72	2.26	4.79	4.48e-05	0.00599	1
17525	XM_021964164.1	LOC110761633	XP_021819856.1	179	uncharacterized protein LOC110761633	66.6	-2.11	-4.3	3.36e-05	0.00493	1
17538	XM_021964242.1	LOC110761697	XP_021819934.1	736	pumilio homolog 23 isoform X2	3.68	5.5	45.38	0.000257	0.02	1
17826	XM_021964522.1	LOC110761940	XP_021820214.1	326	probable isoaspartyl peptidase/L-asparaginase 2	1462.42	2.58	5.96	5.12e-07	0.000147	0.02
17835	XM_021964531.1	LOC110761948	XP_021820223.1	364	probable WRKY transcription factor 7 isoform X1	50.47	1.43	2.7	0.000222	0.02	1
17863	XM_021964570.1	LOC110761980	XP_021820262.1	317	uncharacterized protein LOC110761980	78.5	2.16	4.47	2.78e-05	0.00421	0.85
17869	XM_021964585.1	LOC110761992	XP_021820277.1	778	uncharacterized protein LOC110761992 isoform X2	3.15	6.24	75.38	7.22e-05	0.00829	1
17975	XM_021964694.1	LOC110762089	XP_021820386.1	178	zinc finger protein ZAT12-like	24.67	3.67	12.75	1.09e-05	0.00199	0.33
18013	XM_021964720.1	LOC110762114	XP_021820412.1	788	TMV resistance protein N-like isoform X2	3.01	-3.87	-14.6	0.000427	0.03	1
18014	XM_021964718.1	LOC110762114	XP_021820410.1	836	TMV resistance protein N-like isoform X1	41.72	1.34	2.52	0.000234	0.02	1
18015	XM_021964719.1	LOC110762114	XP_021820411.1	836	TMV resistance protein N-like isoform X1	45.41	1.28	2.42	0.000276	0.02	1
18046	XM_021964724.1	LOC110762122	XP_021820416.1	396	UPF0496 protein 4-like	160.12	1.87	3.66	0.000343	0.03	1
18121	XM_021964798.1	LOC110762193	XP_021820490.1	211	uncharacterized protein LOC110762193	508.3	1.82	3.52	2.14e-06	0.000512	0.07
18122	XM_021964835.1	LOC110762226	XP_021820527.1	200	uncharacterized protein LOC110762226	549.47	1.56	2.95	8.4e-05	0.00917	1
18124	XM_021964801.1	LOC110762196	XP_021820493.1	209	uncharacterized protein LOC110762196	139.99	1.73	3.31	0.000251	0.02	1
18346	XM_021965083.1	LOC110762448	XP_021820775.1	850	putative SWI/SNF-related matrix-associated actin-dependent regulator of chromatin subfamily A member 3-like 1 isoform X2	3.08	9.07	538.97	0.000218	0.02	1
18371	XM_021965169.1	LOC110762517	XP_021820861.1	473	BTB/POZ domain-containing protein At5g41330	23.48	1.72	3.3	5.59e-05	0.00687	1
18428	XM_021965107.1	LOC110762464	XP_021820799.1	193	uncharacterized protein LOC110762464	39.33	2.12	4.35	0.000388	0.03	1
18489	XM_021965254.1	LOC110762605	XP_021820946.1	253	chorismate mutase 2	247.27	2.61	6.12	3.19e-09	1.65e-06	9.8e-05
18516	XM_021965291.1	LOC110762631	XP_021820983.1	349	uncharacterized protein LOC110762631	81.28	1.86	3.63	0.000497	0.03	1
18565	XM_021965295.1	LOC110762634	XP_021820987.1	301	uncharacterized protein LOC110762634 isoform X2	7.15	3.43	10.75	0.000117	0.01	1
18566	XM_021965294.1	LOC110762634	XP_021820986.1	301	uncharacterized protein LOC110762634 isoform X1	10.36	2.84	7.17	8.39e-05	0.00917	1
18778	XM_021965589.1	LOC110762878	XP_021821281.1	995	uncharacterized protein LOC110762878 isoform X2	1.56	5.27	38.71	0.000229	0.02	1
18813	XM_021965636.1	LOC110762914	XP_021821328.1	580	calmodulin-binding protein 60 G-like isoform X2	190.54	2.76	6.76	1.41e-12	1.88e-09	4.32e-08
18866	XM_021965675.1	LOC110762949	XP_021821367.1	267	serine/threonine-protein kinase SRK2E isoform X2	15.76	8.93	489.44	0.00065	0.04	1
18974	XM_021965812.1	LOC110763068	XP_021821504.1	472	5'-adenylylsulfate reductase 3, chloroplastic-like	23.82	-1.64	-3.11	0.000816	0.05	1
19036	XM_021965799.1	LOC110763061	XP_021821491.1	835	polyadenylation and cleavage factor homolog 4 isoform X2	8.26	3.19	9.15	0.000436	0.03	1
19180	XM_021966022.1	LOC110763271	XP_021821714.1	229	ethylene-responsive transcription factor 4	466.54	3.4	10.55	5.16e-06	0.00107	0.16
19211	XM_021966050.1	LOC110763295	XP_021821742.1	254	zinc finger A20 and AN1 domain-containing stress-associated protein 3-like	268.57	1.96	3.9	0.000788	0.04	1
19275	XM_021966104.1	LOC110763340	XP_021821796.1	70	18.1 kDa class I heat shock protein-like; frame=3	256.63	-4.47	-22.23	5.85e-06	0.00119	0.18
19376	XM_021966234.1	LOC110763446	XP_021821926.1	768	protein LONGIFOLIA 1	21.96	-3.95	-15.45	7.72e-05	0.00858	1
19465	XM_021966322.1	LOC110763530	XP_021822014.1	875	uncharacterized protein LOC110763530	9.07	-2.12	-4.36	0.000409	0.03	1
19479	XM_021966378.1	LOC110763569	XP_021822070.1	435	CBL-interacting serine/threonine-protein kinase 4-like	150.5	1.75	3.36	0.000646	0.04	1
19521	XM_021966398.1	LOC110763584	XP_021822090.1	678	protein SIEVE ELEMENT OCCLUSION B-like isoform X1	1.97	-5.2	-36.87	0.000154	0.01	1
19617	XM_021966494.1	LOC110763662	XP_021822186.1	402	magnesium-protoporphyrin IX monomethyl ester oxidative; cyclase, chloroplastic isoform X2	16.88	10.17	1151.63	5.23e-05	0.00658	1
19709	XM_021966620.1	LOC110763769	XP_021822312.1	344	DEAD-box ATP-dependent RNA helicase 56 isoform X2	9.33	9.05	528.76	0.000465	0.03	1
19725	XM_021966610.1	LOC110763764	XP_021822302.1	636	uncharacterized protein LOC110763764	20.56	2.27	4.83	3.9e-05	0.00564	1
19863	XM_021966773.1	LOC110763888	XP_021822465.1	416	uncharacterized protein LOC110763888	41.88	-1.55	-2.92	0.00047	0.03	1
19897	XM_021966815.1	LOC110763916	XP_021822507.1	890	calmodulin-binding transcription activator 5 isoform X3	10.04	10.29	1249.02	4.71e-05	0.00608	1
19951	XM_021966864.1	LOC110763975	XP_021822556.1	575	uncharacterized protein At1g04910-like	53.05	2.53	5.78	2.7e-10	1.8e-07	8.28e-06
19957	XM_021966861.1	LOC110763971	XP_021822553.1	868	linoleate 13S-lipoxygenase 2-1, chloroplastic-like	6.35	-3.12	-8.71	0.000887	0.05	1
20033	XM_021966936.1	LOC110764033	XP_021822628.1	455	protein NTM1-like 9 isoform X2	3.01	8.58	381.87	0.000704	0.04	1
20376	XM_021967290.1	LOC110764344	XP_021822982.1	237	NAC domain-containing protein 41	19.77	2.83	7.1	3.25e-06	0.000731	0.1
20404	XM_021967365.1	LOC110764395	XP_021823057.1	1577	uncharacterized protein LOC110764395 isoform X3	2.38	6.05	66.36	1.08e-05	0.00199	0.33
20668	XM_021967714.1	LOC110764703	XP_021823406.1	306	ethylene-responsive transcription factor ERF105-like	68.46	1.86	3.62	4.07e-05	0.00569	1
20669	XM_021967713.1	LOC110764702	XP_021823405.1	306	ethylene-responsive transcription factor ERF105-like	70.21	1.94	3.84	4.13e-05	0.00569	1
20749	XM_021967774.1	LOC110764754	XP_021823466.1	203	21 kDa protein	42.74	-4	-15.96	9.35e-10	5.59e-07	2.87e-05
21145	XM_021968204.1	LOC110765129	XP_021823896.1	148	14 kDa proline-rich protein DC2.15-like	45.04	1.76	3.39	0.000817	0.05	1
21219	XM_021968278.1	LOC110765207	XP_021823970.1	424	transcription termination factor MTERF6, chloroplastic/mitochondrial-like isoform X1	3.94	-4.96	-31.15	8.82e-06	0.00167	0.27
21339	XM_021968412.1	LOC110765318	XP_021824104.1	1089	TMV resistance protein N-like isoform X2	3.82	4.44	21.71	9.11e-06	0.00171	0.28
21377	XM_021968435.1	LOC110765337	XP_021824127.1	485	UPF0481 protein At3g47200-like	14.31	2.24	4.71	2.89e-05	0.00429	0.89
21378	XM_021968464.1	LOC110765354	XP_021824156.1	589	uncharacterized protein LOC110765354	124.7	3.1	8.6	4.68e-11	3.96e-08	1.44e-06
21423	XM_021968604.1	LOC110765466	XP_021824296.1	302	uncharacterized protein LOC110765466	5.79	3.2	9.16	0.000389	0.03	1
21424	XM_021968613.1	LOC110765476	XP_021824305.1	184	E3 ubiquitin-protein ligase RHA2A-like	402.27	2.54	5.8	0.000204	0.02	1
21452	XM_021968505.1	LOC110765388	XP_021824197.1	190	uncharacterized protein LOC110765388	145.99	2.59	6	1.57e-08	6.97e-06	0.00048
21476	XM_021968509.1	LOC110765393	XP_021824201.1	146	heavy metal-associated isoprenylated plant protein 20	97.94	-1.82	-3.53	0.000512	0.03	1
21620	XM_021968732.1	LOC110765589	XP_021824424.1	86	classical arabinogalactan protein 1-like	61.68	2.93	7.64	0.000406	0.03	1
21644	XM_021969029.1	LOC110765793	XP_021824721.1	562	thiamine biosynthetic bifunctional enzyme TH1, chloroplastic isoform X2	2.01	4.55	23.4	0.000375	0.03	1
21707	XM_021969037.1	LOC110765799	XP_021824729.1	205	uncharacterized protein LOC110765799	25.73	-4.84	-28.54	3.66e-07	0.000112	0.01
21739	XM_021968790.1	LOC110765625	XP_021824482.1	513	cytochrome P450 98A2-like isoform X1	110.7	2.22	4.67	1.12e-05	0.00202	0.34
21946	XM_021969120.1	LOC110765877	XP_021824812.1	415	amino acid transporter AVT6C-like isoform X2	9.38	-7.68	-205.37	5.15e-08	2.05e-05	0.00158
21952	XM_021969124.1	LOC110765880	XP_021824816.1	322	amino acid transporter AVT6C-like isoform X1	28.94	-1.8	-3.48	0.000705	0.04	1
22310	XM_021969504.1	LOC110766216	XP_021825196.1	593	transcription factor MYB3R-3-like isoform X1	10.29	-3.36	-10.24	0.000108	0.01	1
22311	XM_021969505.1	LOC110766216	XP_021825197.1	577	transcription factor MYB3R-3-like isoform X2	5.76	7.75	215.59	5.01e-07	0.000147	0.02
22333	XM_021969532.1	LOC110766237	XP_021825224.1	1214	uncharacterized protein LOC110766237 isoform X3	1.44	3.61	12.22	0.000709	0.04	1
22378	XM_021969581.1	LOC110766284	XP_021825273.1	292	histone chaperone RTT106-like isoform X2	10.47	9.04	527.69	0.000441	0.03	1
22386	XM_021969603.1	LOC110766304	XP_021825295.1	731	uncharacterized protein LOC110766304 isoform X2	1.23	4.18	18.13	0.000494	0.03	1
22523	XM_021969750.1	LOC110766418	XP_021825442.1	179	uncharacterized protein LOC110766418	215.77	1.42	2.67	0.000732	0.04	1
22562	XM_021969780.1	LOC110766447	XP_021825472.1	586	TMV resistance protein N-like isoform X2	77.41	2.02	4.07	7.38e-07	0.000204	0.02
22567	XM_021969782.1	LOC110766449	XP_021825474.1	277	toll/interleukin-1 receptor-like protein	22.98	2.62	6.16	1.72e-05	0.00292	0.53
22569	XM_021969778.1	LOC110766446	XP_021825470.1	767	protein SUPPRESSOR OF npr1-1, CONSTITUTIVE 1-like	57.34	2.5	5.67	3.43e-08	1.47e-05	0.00105
22607	XM_021969849.1	LOC110766509	XP_021825541.1	361	probable E3 ubiquitin-protein ligase RHC2A	68.35	2.8	6.97	2.72e-05	0.00418	0.84
22666	XM_021969976.1	LOC110766613	XP_021825668.1	459	serine/threonine-protein kinase TNNI3K	38.67	1.54	2.91	0.0001	0.01	1
22780	XM_021970012.1	LOC110766644	XP_021825704.1	103	holotricin-3-like	115.56	-2.81	-7.01	1.56e-05	0.00268	0.48
22911	XM_021970205.1	LOC110766817	XP_021825897.1	293	uncharacterized protein LOC110766817	33.19	-5.35	-40.85	4.82e-13	7.31e-10	1.48e-08
22914	XM_021970201.1	LOC110766812	XP_021825893.1	186	transcription factor bHLH162	18.26	-2.89	-7.41	0.000561	0.03	1
22985	XM_021970314.1	LOC110766905	XP_021826006.1	531	U-box domain-containing protein 38-like	84.18	2.4	5.29	0.000422	0.03	1
23095	XM_021970346.1	LOC110766926	XP_021826038.1	1643	protein MODIFIER OF SNC1 1 isoform X2	4.98	3.11	8.61	0.000145	0.01	1
23185	XM_021970436.1	LOC110767017	XP_021826128.1	786	serine/threonine-protein kinase-like protein CCR4	43.89	4.74	26.73	3.66e-14	5.94e-11	1.12e-09
23370	XM_021970692.1	LOC110767216	XP_021826384.1	533	uncharacterized protein LOC110767216	3.51	3.41	10.63	2.61e-05	0.00412	0.8
23480	XM_021970800.1	LOC110767296	XP_021826492.1	520	uncharacterized protein LOC110767296	14.73	2.37	5.16	1.22e-05	0.00216	0.37
23485	XM_021970747.1	LOC110767258	XP_021826439.1	210	CASP-like protein 4B1	12.93	3.58	11.98	0.000231	0.02	1
23486	XM_021970745.1	LOC110767257	XP_021826437.1	536	probable WRKY transcription factor 33	110.57	3.23	9.4	1.87e-14	3.55e-11	5.75e-10
23713	XM_021971094.1	LOC110767526	XP_021826786.1	1211	receptor-like protein kinase BRI1-like 3	15.64	1.68	3.2	5.24e-05	0.00658	1
23761	XM_021971102.1	LOC110767531	XP_021826794.1	460	probable amino acid permease 7 isoform X2	26.18	1.55	2.93	0.000433	0.03	1
23762	XM_021971103.1	LOC110767531	XP_021826795.1	460	probable amino acid permease 7 isoform X2	26.4	1.47	2.78	0.000848	0.05	1
23763	XM_021971104.1	LOC110767531	XP_021826796.1	460	probable amino acid permease 7 isoform X2	25.14	1.61	3.05	0.000488	0.03	1
23764	XM_021971105.1	LOC110767531	XP_021826797.1	460	probable amino acid permease 7 isoform X2	27.26	1.75	3.36	4.61e-05	0.00603	1
23785	XM_021971345.1	LOC110767715	XP_021827037.1	483	xyloglucan galactosyltransferase XLT2	90.95	1.74	3.33	0.000671	0.04	1
23841	XM_021971179.1	LOC110767596	XP_021826871.1	234	dehydration-responsive element-binding protein 1A-like	66.62	3.27	9.67	4.15e-08	1.72e-05	0.00127
23979	XM_021971203.1	LOC110767619	XP_021826895.1	644	scarecrow-like protein 8	22.4	1.82	3.53	0.000182	0.02	1
24233	XM_021971630.1	LOC110767958	XP_021827322.1	381	probable protein phosphatase 2C 63	154.92	1.49	2.81	0.000233	0.02	1
24301	XM_021971728.1	LOC110768049	XP_021827420.1	479	abscisic acid 8'-hydroxylase 1-like	231.45	4.05	16.52	3.58e-20	8.13e-16	1.1e-15
24356	XM_021971786.1	LOC110768098	XP_021827478.1	971	respiratory burst oxidase homolog protein D-like	556.26	1.59	3.01	0.000153	0.01	1
24590	XM_021972067.1	LOC110768341	XP_021827759.1	440	mannose-6-phosphate isomerase 1-like	34.81	1.59	3.01	0.00055	0.03	1
24667	XM_021972113.1	LOC110768386	XP_021827805.1	496	CBL-interacting protein kinase 2-like isoform X2	112.5	1.41	2.65	6.33e-05	0.00737	1
24789	XM_021972270.1	LOC110768518	XP_021827962.1	162	chromatin remodeling protein SHL-like isoform X3	76.26	3.11	8.63	0.000256	0.02	1
24832	XM_021972318.1	LOC110768552	XP_021828010.1	700	probable xyloglucan glycosyltransferase 12	232.1	2.45	5.48	2.37e-09	1.28e-06	7.29e-05
24834	XM_021972315.1	LOC110768550	XP_021828007.1	454	amino acid transporter AVT6A-like isoform X1	26.75	1.58	2.98	0.000493	0.03	1
25003	XM_021972499.1	LOC110768671	XP_021828191.1	1107	TMV resistance protein N-like isoform X2	6.77	3.68	12.86	1.89e-07	6.32e-05	0.00581
25045	XM_021972532.1	LOC110768693	XP_021828224.1	981	protein MEI2-like 4 isoform X5	2.36	6.85	115.36	0.000375	0.03	1
25090	XM_021972606.1	LOC110768758	XP_021828298.1	561	(3S,6E)-nerolidol synthase 1-like isoform X2	6.8	-5.35	-40.91	1.48e-06	0.000371	0.05
25132	XM_021972656.1	LOC110768801	XP_021828348.1	165	glycine cleavage system H protein 3, mitochondrial	237.03	-1.38	-2.61	0.000102	0.01	1
25304	XM_021972831.1	LOC110768952	XP_021828523.1	323	probable WRKY transcription factor 70	303.86	2.66	6.3	1.65e-07	5.67e-05	0.00505
25387	XM_021972912.1	LOC110769012	XP_021828604.1	619	probable serine/threonine-protein kinase WNK5	11.56	-2.37	-5.16	0.000586	0.04	1
25622	XM_021973178.1	LOC110769242	XP_021828870.1	403	uncharacterized protein LOC110769242 isoform X1	31.98	2.23	4.69	2.65e-05	0.00413	0.81
25631	XM_021973196.1	LOC110769259	XP_021828888.1	446	zinc finger CCCH domain-containing protein 48-like	72.99	1.51	2.85	2.7e-05	0.00418	0.83
25632	XM_021973197.1	LOC110769260	XP_021828889.1	458	zinc finger CCCH domain-containing protein 48-like	71.38	1.69	3.24	2.88e-05	0.00429	0.88
25644	XM_021973198.1	LOC110769261	XP_021828890.1	216	transcription factor TCP9	32.05	3.14	8.83	1.34e-05	0.00232	0.41
25770	XM_021973361.1	LOC110769398	XP_021829053.1	914	replication factor C subunit 1 isoform X5	18.09	3.7	12.99	2.89e-05	0.00429	0.89
25773	XM_021973364.1	LOC110769402	XP_021829056.1	323	mitochondrial uncoupling protein 4-like	68.69	4.93	30.52	5.15e-13	7.31e-10	1.58e-08
25997	XM_021973623.1	LOC110769605	XP_021829315.1	678	protein LYK5	61.47	2.56	5.89	4.33e-06	0.000919	0.13
26007	XM_021973627.1	LOC110769609	XP_021829319.1	530	F-box/LRR-repeat protein 14 isoform X2	9.4	5.96	62.28	2.42e-05	0.00388	0.74
26113	XM_021973745.1	LOC110769710	XP_021829437.1	575	uncharacterized protein LOC110769710 isoform X4	5.73	2.92	7.55	0.000905	0.05	1
26159	XM_021973806.1	LOC110769771	XP_021829498.1	427	phospholipase A(1) LCAT3 isoform X2	7.35	8.94	490.77	0.000597	0.04	1
26192	XM_021973823.1	LOC110769786	XP_021829515.1	1017	leucine-rich repeat receptor-like serine/threonine-protein kinase BAM1	15.22	1.52	2.87	0.000763	0.04	1
26392	XM_021974049.1	LOC110769981	XP_021829741.1	327	transcription factor MYB44-like	193.98	1.75	3.37	0.000413	0.03	1
26402	XM_021974055.1	LOC110769985	XP_021829747.1	537	F-box protein SKIP2	64.59	1.74	3.33	0.000205	0.02	1
26418	XM_021974078.1	LOC110770006	XP_021829770.1	715	scarecrow-like protein 14 isoform X1	52.78	2.38	5.19	1e-08	5.05e-06	0.000307
26551	XM_021974228.1	LOC110770143	XP_021829920.1	1111	TMV resistance protein N-like isoform X2	5.88	5.2	36.88	3.12e-06	0.000709	0.1
26552	XM_021974227.1	LOC110770143	XP_021829919.1	1151	TMV resistance protein N-like isoform X1	26.34	1.92	3.78	0.000106	0.01	1
26580	XM_021974274.1	LOC110770187	XP_021829966.1	240	B-box zinc finger protein 21-like	12.33	2.59	6.02	0.000356	0.03	1
26647	XM_021974345.1	LOC110770248	XP_021830037.1	227	probable calcium-binding protein CML36	974.3	3.36	10.28	7.38e-06	0.00143	0.23
26777	XM_021974477.1	LOC110770353	XP_021830169.1	185	two-component response regulator ORR9-like	122.13	1.8	3.49	0.00025	0.02	1
26874	XM_021974586.1	LOC110770448	XP_021830278.1	942	disease resistance protein RPM1-like	3.63	2.87	7.29	0.000461	0.03	1
27003	XM_021974777.1	LOC110770603	XP_021830469.1	487	probable L-cysteine desulfhydrase, chloroplastic	1.65	-3.34	-10.09	0.000588	0.04	1
27160	XM_021974920.1	LOC110770715	XP_021830612.1	477	pentatricopeptide repeat-containing protein At5g48730, chloroplastic isoform X2	5.65	6.5	90.6	6.77e-05	0.00785	1
27448	XM_021975232.1	LOC110771007	XP_021830924.1	448	U-box domain-containing protein 21	72.69	3.77	13.66	1.33e-11	1.44e-08	4.1e-07
27469	XM_021975243.1	LOC110771014	XP_021830935.1	547	kinesin light chain 3 isoform X3	3.03	11.21	2374.69	2e-05	0.00326	0.61
27486	XM_021975269.1	LOC110771031	XP_021830961.1	2741	uncharacterized protein LOC110771031 isoform X1	2.02	4.96	31.07	0.000103	0.01	1
27691	XM_021975506.1	LOC110771241	XP_021831198.1	350	arginase 1, mitochondrial	78.12	-1.9	-3.73	0.000819	0.05	1
27987	XM_021975912.1	LOC110771585	XP_021831604.1	668	uncharacterized membrane protein F35D11.3-like isoform X3	2.1	7.18	145.45	3.19e-05	0.00471	0.98
28084	XM_021975946.1	LOC110771616	XP_021831638.1	499	cytochrome P450 81E8-like	29.61	-3.12	-8.68	2.67e-07	8.67e-05	0.0082
28128	XM_021975988.1	LOC110771652	XP_021831680.1	540	scarecrow-like protein 13	102.78	1.2	2.3	0.000466	0.03	1
28275	XM_021976162.1	LOC110771809	XP_021831854.1	311	uncharacterized protein LOC110771809	41.44	3.57	11.84	1.15e-05	0.00205	0.35
28360	XM_021976251.1	LOC110771888	XP_021831943.1	758	scarecrow-like protein 22 isoform X2	8.04	10	1022.02	7.34e-05	0.00838	1
28495	XM_021976382.1	LOC110772019	XP_021832074.1	428	E3 ubiquitin-protein ligase SINA-like 7 isoform X2	4.47	-4.26	-19.16	0.000588	0.04	1
28565	XM_021976429.1	LOC110772054	XP_021832121.1	1142	putative disease resistance protein RGA3 isoform X4	1.28	5.03	32.56	0.000842	0.05	1
28567	XM_021976406.1	LOC110772032	XP_021832098.1	1230	putative disease resistance protein RGA3	17.43	1.61	3.05	4.79e-05	0.00608	1
28670	XM_021976594.1	LOC110772185	XP_021832286.1	349	histidine protein methyltransferase 1 homolog	74.98	1.91	3.76	1.84e-07	6.24e-05	0.00565
28671	XM_021976595.1	LOC110772185	XP_021832287.1	349	histidine protein methyltransferase 1 homolog	70.58	1.79	3.46	1.25e-06	0.000327	0.04
28756	XM_021976632.1	LOC110772213	XP_021832324.1	279	transcription factor MYB8-like	35.83	-3.34	-10.15	0.000314	0.02	1
28845	XM_021976797.1	LOC110772360	XP_021832489.1	169	auxin-responsive protein IAA9-like	28.3	9.51	729.51	0.000196	0.02	1
28954	XM_021976920.1	LOC110772480	XP_021832612.1	281	zinc finger protein ZAT10-like	187.6	2.77	6.82	1.76e-06	0.00043	0.05
28982	XM_021976994.1	LOC110772557	XP_021832686.1	279	ethylene-responsive transcription factor ERF109-like	36.98	4.91	30.12	3.93e-16	8.12e-13	1.21e-11
29027	XM_021977014.1	LOC110772574	XP_021832706.1	2941	BEACH domain-containing protein B isoform X3	6.74	11.37	2645.47	6e-06	0.00121	0.18
29073	XM_021977055.1	LOC110772599	XP_021832747.1	1141	probable leucine-rich repeat receptor-like protein kinase At1g35710	4.96	-2.77	-6.81	0.000681	0.04	1
29108	XM_021977074.1	LOC110772620	XP_021832766.1	241	zinc finger protein ZAT10-like	52.88	2.27	4.84	0.000326	0.02	1
29140	XM_021977132.1	LOC110772681	XP_021832824.1	237	small heat shock protein, chloroplastic-like	138.59	-2.76	-6.77	0.000421	0.03	1
29312	XM_021977313.1	LOC110772834	XP_021833005.1	482	nematode resistance protein-like HSPRO2	270.29	1.66	3.17	0.000316	0.02	1
29343	XM_021977371.1	LOC110772887	XP_021833063.1	888	AMP deaminase-like isoform X2	1.31	6.26	76.75	0.000137	0.01	1
29350	XM_021977355.1	LOC110772874	XP_021833047.1	514	uncharacterized protein LOC110772874	211.07	1.99	3.98	4.53e-05	0.00599	1
29387	XM_021977408.1	LOC110772916	XP_021833100.1	328	mitochondrial uncoupling protein 5-like	628.86	2.74	6.69	1.29e-05	0.00228	0.4
29505	XM_021977557.1	LOC110773054	XP_021833249.1	384	disease resistance protein TAO1-like isoform X4	12.6	9.69	823.86	0.000133	0.01	1
29517	XM_021977538.1	LOC110773052	XP_021833230.1	1087	TMV resistance protein N-like isoform X1	27.15	1.48	2.79	0.00036	0.03	1
29577	XM_021977624.1	LOC110773113	XP_021833316.1	564	putative laccase-9	97.76	-1.58	-2.99	4.37e-05	0.00591	1
29651	XM_021977708.1	LOC110773204	XP_021833400.1	1076	TMV resistance protein N-like	24.85	2.36	5.12	2.18e-06	0.000516	0.07
29870	XM_021977944.1	LOC110773423	XP_021833636.1	359	alcohol dehydrogenase 1-like isoform X2	17.94	9.91	958.79	9.75e-05	0.01	1
29997	XM_021978118.1	LOC110773593	XP_021833810.1	502	uncharacterized protein LOC110773593 isoform X2	6.8	9.54	744.75	0.000166	0.01	1
30073	XM_021978194.1	LOC110773674	XP_021833886.1	630	exocyst complex component EXO70H1-like	146.74	3.74	13.36	3.3e-10	2.14e-07	1.01e-05
30248	XM_021978383.1	LOC110773867	XP_021834075.1	653	probable LRR receptor-like serine/threonine-protein kinase RKF3	23.11	1.62	3.07	0.0002	0.02	1
30283	XM_021978424.1	LOC110773918	XP_021834116.1	193	uncharacterized protein LOC110773918	13.54	3.14	8.81	0.000175	0.02	1
30342	XM_021978507.1	LOC110773991	XP_021834199.1	514	phospholipase A1-Igamma1, chloroplastic	28.61	2.17	4.5	1.06e-06	0.000282	0.03
30382	XM_021978541.1	LOC110774022	XP_021834233.1	412	KH domain-containing protein At4g18375-like isoform X2	5.69	10.15	1134.69	0.000117	0.01	1
30391	XM_021978573.1	LOC110774049	XP_021834265.1	124	protein TIFY 5A	138.33	-2.18	-4.53	0.000279	0.02	1
30425	XM_021978522.1	LOC110774004	XP_021834214.1	332	WD repeat-containing protein 70-like	6.58	4.56	23.59	0.000126	0.01	1
30445	XM_021978495.1	LOC110773980	XP_021834187.1	305	uncharacterized protein ycf23-like	115.38	-1.45	-2.73	0.000297	0.02	1
30486	XM_021978626.1	LOC110774096	XP_021834318.1	210	protein NDR1-like	90.7	2.05	4.14	5.07e-07	0.000147	0.02
30566	XM_021978747.1	LOC110774202	XP_021834439.1	858	DExH-box ATP-dependent RNA helicase DExH1 isoform X2	7.9	9.66	809.06	8.64e-05	0.00935	1
30569	XM_021978748.1	LOC110774203	XP_021834440.1	329	syntaxin-121-like	258.76	2.25	4.75	6.07e-05	0.00723	1
30885	XM_021979076.1	LOC110774531	XP_021834768.1	132	uncharacterized protein LOC110774531	20.03	2.92	7.59	0.000314	0.02	1
30898	XM_021979071.1	LOC110774526	XP_021834763.1	2645	golgin subfamily A member 4 isoform X4	4.66	5.61	48.79	3.79e-06	0.000824	0.12
30899	XM_021979072.1	LOC110774526	XP_021834764.1	2619	golgin subfamily A member 4 isoform X5	1.92	10.95	1975.53	6.89e-06	0.00135	0.21
31011	XM_021944225.1	LOC110744258	XP_021799917.1	640	LRR receptor-like serine/threonine-protein kinase RCH1	23.75	2.51	5.7	0.000149	0.01	1
31141	XM_021944367.1	LOC110744400	XP_021800059.1	584	outer envelope protein 61	117.57	1.32	2.5	0.000149	0.01	1
31148	XM_021944379.1	LOC110744413	XP_021800071.1	435	uncharacterized protein LOC110744413 isoform X2	27.97	3.87	14.65	4.96e-10	3.13e-07	1.52e-05
31149	XM_021944378.1	LOC110744413	XP_021800070.1	435	uncharacterized protein LOC110744413 isoform X1	28.67	3.93	15.23	1.26e-09	7.18e-07	3.88e-05
31212	XM_021944435.1	LOC110744461	XP_021800127.1	531	calcium-dependent protein kinase 8-like	250.95	1.14	2.21	0.000921	0.05	1
31454	XM_021944723.1	LOC110744734	XP_021800415.1	1190	TMV resistance protein N-like	16.75	1.34	2.53	0.000634	0.04	1
31481	XM_021944751.1	LOC110744753	XP_021800443.1	442	ureide permease 2-like isoform X1	32.65	1.53	2.89	0.000616	0.04	1
31494	XM_021944773.1	LOC110744765	XP_021800465.1	237	uncharacterized protein At3g49140-like isoform X5	15.09	7.64	199.12	1.38e-07	5.06e-05	0.00424
31553	XM_021944862.1	LOC110744834	XP_021800554.1	478	ferrochelatase-2, chloroplastic	100.68	1.84	3.57	1.43e-06	0.000368	0.04
31587	XM_021944868.1	LOC110744841	XP_021800560.1	1057	TMV resistance protein N-like isoform X1	3.46	2.94	7.65	0.000786	0.04	1
31588	XM_021944870.1	LOC110744844	XP_021800562.1	1100	TMV resistance protein N-like	9.19	1.97	3.92	0.000419	0.03	1
31599	XM_021944876.1	LOC110744850	XP_021800568.1	459	protein BIG GRAIN 1-like A	11.28	-3.96	-15.56	7.43e-05	0.0084	1
31749	XM_021945050.1	LOC110745000	XP_021800742.1	283	serine/threonine-protein kinase TNNI3K-like	30.07	1.5	2.83	0.000548	0.03	1
31814	XM_021945124.1	LOC110745058	XP_021800816.1	181	uncharacterized protein LOC110745058	506.15	2.54	5.8	0.00011	0.01	1
32384	XM_021945761.1	LOC110745637	XP_021801453.1	316	tryptophan synthase alpha chain-like	3.22	-4.65	-25.17	0.000385	0.03	1
32420	XM_021945801.1	LOC110745682	XP_021801493.1	193	protein EXORDIUM-like 5	86.2	11.15	2269.79	6.94e-05	0.00801	1
32725	XM_021946146.1	LOC110745967	XP_021801838.1	411	U-box domain-containing protein 28	27.2	3.14	8.83	9.44e-07	0.000255	0.03
32835	XM_021946270.1	LOC110746069	XP_021801962.1	1128	TMV resistance protein N-like isoform X1	8.67	1.44	2.7	0.000748	0.04	1
32837	XM_021946272.1	LOC110746071	XP_021801964.1	796	TMV resistance protein N-like	21.74	1.81	3.52	3.94e-05	0.00567	1
32838	XM_021946273.1	LOC110746071	XP_021801965.1	796	TMV resistance protein N-like	22.91	1.83	3.57	5.8e-06	0.00119	0.18
32839	XM_021946274.1	LOC110746071	XP_021801966.1	796	TMV resistance protein N-like	23.92	2.02	4.06	7.72e-07	0.000211	0.02
32840	XM_021946277.1	LOC110746073	XP_021801969.1	379	uncharacterized protein LOC110746073	62.75	1.63	3.1	0.000107	0.01	1
32991	XM_021946443.1	LOC110746235	XP_021802135.1	390	S-adenosylmethionine synthase 3	5.73	-2.9	-7.48	0.000141	0.01	1
33019	XM_021946475.1	LOC110746269	XP_021802167.1	307	RHOMBOID-like protein 1	78.8	1.35	2.56	0.000385	0.03	1
33560	XM_021947097.1	LOC110746869	XP_021802789.1	266	NDR1/HIN1-like protein 13	232.53	2.94	7.66	1.14e-08	5.42e-06	0.000351
33563	XM_021947098.1	LOC110746870	XP_021802790.1	490	probable xyloglucan galactosyltransferase GT17	10.58	3.66	12.6	2.92e-06	0.00067	0.09
33848	XM_021947428.1	LOC110747224	XP_021803120.1	946	glutamate receptor 2.7-like isoform X1	6.11	1.85	3.61	0.000661	0.04	1
33849	XM_021947429.1	LOC110747224	XP_021803121.1	946	glutamate receptor 2.7-like isoform X1	6.28	1.76	3.38	0.000535	0.03	1
33850	XM_021947430.1	LOC110747224	XP_021803122.1	946	glutamate receptor 2.7-like isoform X2	6.19	1.73	3.32	0.000913	0.05	1
33851	XM_021947431.1	LOC110747224	XP_021803123.1	767	glutamate receptor 2.7-like isoform X3	2.56	8.89	473.49	0.00049	0.03	1
34028	XM_021947632.1	LOC110747459	XP_021803324.1	193	TMV resistance protein N-like	51.06	2.56	5.89	1.43e-07	5.16e-05	0.00439
34029	XM_021947633.1	LOC110747460	XP_021803325.1	1125	TMV resistance protein N-like	18.53	1.77	3.41	5.74e-05	0.00702	1
34043	XM_021947648.1	LOC110747480	XP_021803340.1	1018	TMV resistance protein N-like	37.04	1.42	2.68	2.74e-05	0.00419	0.84
34064	XM_021947671.1	LOC110747510	XP_021803363.1	181	(-)-alpha-pinene synthase-like	222.73	-1.54	-2.9	0.000865	0.05	1
34093	XM_021947702.1	LOC110747548	XP_021803394.1	665	TMV resistance protein N-like	68.8	1.43	2.7	6.2e-05	0.00726	1
34105	XM_021947716.1	LOC110747564	XP_021803408.1	142	uncharacterized protein LOC110747564	99.81	4.73	26.46	2.15e-10	1.53e-07	6.61e-06
34106	XM_021947717.1	LOC110747565	XP_021803409.1	329	disease resistance protein RPS6-like	114	1.4	2.64	4.08e-05	0.00569	1
34239	XM_021947873.1	LOC110747766	XP_021803565.1	304	TMV resistance protein N-like	36.48	1.49	2.81	0.00057	0.03	1
34299	XM_021947943.1	LOC110747866	XP_021803635.1	315	probable GTP diphosphokinase CRSH, chloroplastic	14.73	10.43	1379.29	4.52e-05	0.00599	1
34332	XM_021947980.1	LOC110747917	XP_021803672.1	169	tetraspanin-8-like	14.06	4.58	23.9	0.000104	0.01	1
34524	XM_021948191.1	LOC110748165	XP_021803883.1	145	phosphatidylinositol/phosphatidylcholine transfer protein SFH8-like	42.69	9.87	935.97	9.87e-05	0.01	1
34960	XM_021948680.1	LOC110748735	XP_021804372.1	954	MDIS1-interacting receptor like kinase 2-like	35.24	1.24	2.37	0.000551	0.03	1

## Sheet: S9_local_3strains
Supplementary Table S9. The differentially expressed genes shared after inoculation with all three Pss strains from the local samples of sweet cherry.
						A1M3						A1M197						11116_b1
No. protein	Gene	Gene ID (LOC)	Protein ID	Size (aa)	Description	Max group mean	Log₂ fold change	Fold change	P-value	FDR p-value	Bonferroni	Max group mean	Log₂ fold change	Fold change	P-value	FDR p-value	Bonferroni	Max group mean	Log₂ fold change	Fold change	P-value	FDR p-value	Bonferroni
822	XM_021953650.1	LOC110752889	XP_021809342.1	663	low affinity sulfate transporter 3	16.64	-2.2	-4.59	0.000376	0.02	1	16.64	-2.76	-6.76	6.63e-06	0.0025	0.21	16.64	-2.44	-5.43	6.47e-05	0.02	1
3834	XM_021948968.1	LOC110748978	XP_021804660.1	379	early nodulin-75-like	49.43	-2.28	-4.86	0.000279	0.02	1	49.43	-3.59	-12.06	9.12e-09	1.31e-05	0.000282	49.43	-3.25	-9.51	1.88e-07	0.000344	0.00581
5245	XM_021950567.1	LOC110750267	XP_021806259.1	103	late embryogenesis abundant protein Lea5	42.96	-2.23	-4.68	0.000371	0.02	1	42.96	-2.37	-5.15	8.37e-05	0.02	1	42.96	-3.01	-8.05	1.08e-06	0.00119	0.03
5527	XM_021950767.1	LOC110750430	XP_021806459.1	424	basic 7S globulin-like	11.59	-5.52	-45.99	9.21e-07	0.000239	0.03	11.59	-4.25	-19.07	3.14e-07	0.00024	0.00973	11.59	-6.17	-71.8	1.94e-09	1.06e-05	5.99e-05
6915	XM_021952399.1	LOC110751868	XP_021808091.1	475	probable polygalacturonase	194.59	-3.37	-10.36	2.24e-22	1.49e-18	6.93e-18	194.59	-2.46	-5.51	4.08e-13	2e-09	1.26e-08	194.59	-1.64	-3.12	1.29e-06	0.00135	0.04
7082	XM_021952571.1	LOC110751997	XP_021808263.1	443	aspartyl protease AED3	9.53	-3.66	-12.62	4.41e-07	0.000132	0.01	9.53	-2.93	-7.62	5.85e-06	0.00235	0.18	9.53	-2.9	-7.49	7.67e-06	0.00511	0.24
12500	XM_021958579.1	LOC110757058	XP_021814271.1	556	(-)-alpha-pinene synthase-like isoform X2	172.1	-5.64	-49.94	7.59e-22	4.05e-18	2.35e-17	172.1	-3.77	-13.63	1.77e-11	6.18e-08	5.47e-07	172.1	-2.99	-7.95	8.7e-08	0.000273	0.00269
12501	XM_021958578.1	LOC110757058	XP_021814270.1	557	(-)-alpha-pinene synthase-like isoform X1	19.77	-5.36	-41.08	9.71e-13	1.52e-09	3.01e-08	19.77	-3.34	-10.15	1.35e-08	1.84e-05	0.000418	19.77	-4.76	-27.16	1.1e-13	2.42e-09	3.4e-09
12701	XM_021958840.1	LOC110757264	XP_021814532.1	968	receptor-like protein kinase HAIKU2 isoform X2	26.55	5.37	41.36	3.49e-09	2.41e-06	0.000108	11.46	3.92	15.16	1.6e-05	0.00467	0.5	13.91	4.34	20.31	1.76e-06	0.00176	0.05
16135	XM_021962599.1	LOC110760351	XP_021818291.1	486	CBS domain-containing protein CBSCBSPB1-like isoform X2	2.16	3.7	13.01	0.0012	0.05	1	6.25	4.97	31.32	9.61e-06	0.00331	0.3	4.01	4.44	21.7	7.91e-05	0.03	1
19376	XM_021966234.1	LOC110763446	XP_021821926.1	768	protein LONGIFOLIA 1	15.22	-6.3	-78.84	1.14e-09	8.68e-07	3.52e-05	15.22	-2.92	-7.57	0.000218	0.03	1	15.22	-3.49	-11.27	1.31e-05	0.00696	0.41
19522	XM_021966376.1	LOC110763567	XP_021822068.1	573	protein SIEVE ELEMENT OCCLUSION B-like	130.91	-1.83	-3.56	6.03e-07	0.000171	0.02	130.91	-1.91	-3.77	1.47e-07	0.000128	0.00454	130.91	-1.59	-3	1.31e-05	0.00696	0.41
20695	XM_021967783.1	LOC110764762	XP_021823475.1	277	expansin-B15-like	20.48	-3.82	-14.09	2.9e-06	0.00062	0.09	20.48	-5.61	-48.76	4.03e-11	1.23e-07	1.25e-06	20.48	-3.58	-11.97	2.54e-06	0.00223	0.08
22309	XM_021969502.1	LOC110766214	XP_021825194.1	1981	E3 ubiquitin-protein ligase PRT6 isoform X2	5.67	7.53	185.31	1.89e-11	2.19e-08	5.84e-07	8.09	7.97	250.76	1.13e-12	4.6e-09	3.49e-08	6.28	7.9	238.99	1.77e-12	1.95e-08	5.49e-08
22911	XM_021970205.1	LOC110766817	XP_021825897.1	293	uncharacterized protein LOC110766817	28.73	-4.38	-20.89	3.52e-09	2.41e-06	0.000109	28.73	-3.08	-8.43	3.4e-06	0.00163	0.11	28.73	-4.02	-16.17	5.17e-09	2.2e-05	0.00016
24961	XM_021972422.1	LOC110768617	XP_021828114.1	513	protease Do-like 10, mitochondrial isoform X2	2.27	-4.81	-28.06	0.000782	0.03	1	1.91	-11.33	-2572.41	6.46e-06	0.0025	0.2	1.91	-6.02	-64.8	8.54e-05	0.03	1
30898	XM_021979071.1	LOC110774526	XP_021834763.1	2645	golgin subfamily A member 4 isoform X4	3.38	8.77	438	0.000181	0.01	1	3.92	8.87	467.84	0.000148	0.03	1	0.72	11.88	3772.32	3.46e-07	0.000506	0.01
32673	XM_021946088.1	LOC110745929	XP_021801780.1	556	(-)-alpha-pinene synthase-like	36.6	-5.16	-35.68	2.13e-15	7.11e-12	6.59e-11	36.6	-3.39	-10.48	2.07e-09	3.62e-06	6.41e-05	36.6	-2.88	-7.34	3.13e-07	0.000492	0.0097

## Sheet: S10_distal_3strains
Supplementary Table S10. The differentially expressed genes shared after inoculation with all three Pss strains from the distal samples of sweet cherry. The differentially expressed genes shared after inoculation with all three Pss strains from the distal samples of sweet cherry.
						A1M3						A1M197						11116_b1
No. protein	Gene	Gene ID (LOC)	Protein ID	Size (aa)	Description	Max group mean	Log₂ fold change	Fold change	P-value	FDR p-value	Bonferroni	Max group mean	Log₂ fold change	Fold change	P-value	FDR p-value	Bonferroni	Max group mean	Log₂ fold change	Fold change	P-value	FDR p-value	Bonferroni
415	XM_021948911.1	LOC110748926	XP_021804603.1	478	amino acid transporter AVT1H	28.85	6.62	98.56	3.41e-08	8.19e-05	0.00105	6.91	7.1	136.82	3.08e-09	2e-06	9.45e-05	4.56	5.24	37.78	1.32e-05	0.0023	0.4
2162	XM_021967669.1	LOC110764655	XP_021823361.1	659	probable leucine-rich repeat receptor-like protein kinase At1g68400	18.19	1.76	3.39	0.000278	0.03	1	22.52	2.07	4.2	1.8e-05	0.00299	0.55	25.93	2.27	4.84	2.43e-06	0.000564	0.07
4168	XM_021949318.1	LOC110749249	XP_021805010.1	215	ethylene-responsive transcription factor ERF017	9.59	2.92	7.55	0.000225	0.02	1	18.69	4.05	16.53	2.06e-07	7.07e-05	0.00631	12.27	3.29	9.78	2.63e-05	0.00412	0.81
5975	XM_021951256.1	LOC110750878	XP_021806948.1	336	ubiquinol oxidase, mitochondrial-like	32.13	2.24	4.73	0.000192	0.02	1	34.58	2.44	5.42	4.74e-05	0.00649	1	66.01	3.34	10.11	2.45e-08	1.07e-05	0.000751
6603	XM_021952030.1	LOC110751548	XP_021807722.1	654	probable ADP-ribosylation factor GTPase-activating protein AGD14 isoform X2	2.01	-9.98	-1011.37	0.000253	0.02	1	2.01	-4.95	-30.9	0.000221	0.02	1	2.01	-6.19	-72.77	3.53e-05	0.00515	1
7078	XM_021952474.1	LOC110751921	XP_021808166.1	319	mitochondrial uncoupling protein 5-like	169.92	2.36	5.15	0.000317	0.03	1	259.62	3.25	9.49	7.52e-07	0.000214	0.02	751.85	4.47	22.13	9.75e-12	1.11e-08	2.99e-07
7352	XM_021952855.1	LOC110752241	XP_021808547.1	286	probable CCR4-associated factor 1 homolog 11	100.01	2.66	6.3	6e-06	0.00224	0.18	142.7	3.23	9.39	3.46e-08	1.88e-05	0.00106	260.06	3.92	15.13	2.16e-11	2.13e-08	6.63e-07
7820	XM_021953388.1	LOC110752675	XP_021809080.1	1143	uncharacterized protein LOC110752675 isoform X1	1.68	3.45	10.92	0.000203	0.02	1	1.94	3.48	11.15	0.000156	0.02	1	2.2	3.75	13.5	4.47e-05	0.00599	1
8076	XM_021953649.1	LOC110752892	XP_021809341.1	589	(3S,6E)-nerolidol synthase 1-like	57.28	2.35	5.11	2e-06	0.00102	0.06	12.37	-3.58	-11.97	1.81e-10	1.69e-07	5.54e-06	12.37	-3.11	-8.63	1.25e-08	5.78e-06	0.000383
9879	XM_021955732.1	LOC110754633	XP_021811424.1	341	UPF0496 protein 4-like	26.8	2.49	5.6	0.000686	0.05	1	26.94	2.92	7.57	6.36e-05	0.00813	1	42.05	3.34	10.11	4.81e-06	0.001	0.15
11695	XM_021957676.1	LOC110756268	XP_021813368.1	1111	eIF-2-alpha kinase GCN2 isoform X2	1.69	5.58	47.71	0.00034	0.03	1	2.27	5.84	57.37	0.000165	0.02	1	4.6	9.42	682.68	1.04e-09	6.07e-07	3.2e-05
12500	XM_021958579.1	LOC110757058	XP_021814271.1	556	(-)-alpha-pinene synthase-like isoform X2	116.64	-2.64	-6.22	0.000403	0.03	1	116.64	-3.99	-15.84	8.45e-08	3.6e-05	0.00259	116.64	-2.9	-7.45	9.22e-05	0.00989	1
12533	XM_021958612.1	LOC110757080	XP_021814304.1	363	E3 ubiquitin-protein ligase RDUF2	114.77	2.24	4.73	5.21e-06	0.00205	0.16	138.34	2.59	6.03	1.34e-07	5.18e-05	0.00411	209.52	2.96	7.81	1.59e-09	8.81e-07	4.88e-05
13529	XM_021959775.1	LOC110758001	XP_021815467.1	351	uncharacterized protein LOC110758001	224.1	1.95	3.86	3.8e-06	0.00173	0.12	251.66	2.06	4.16	1.05e-06	0.000286	0.03	277.41	2.17	4.49	2.71e-07	8.67e-05	0.00832
13548	XM_021959706.1	LOC110757955	XP_021815398.1	179	F-box protein At1g61340-like	127.59	2.08	4.23	6.36e-06	0.00231	0.2	102.24	1.98	3.93	1.72e-05	0.00289	0.53	100.77	1.89	3.7	3.97e-05	0.00568	1
14326	XM_021960651.1	LOC110758734	XP_021816343.1	371	probable protein phosphatase 2C 25	115.9	1.75	3.36	0.00015	0.02	1	111.36	1.79	3.45	0.000106	0.01	1	172.84	2.22	4.65	1.48e-06	0.000371	0.05
16048	XM_021962523.1	LOC110760279	XP_021818215.1	1055	protein GIGANTEA isoform X3	4.71	7.83	228.28	2.36e-08	7.06e-05	0.000723	5.5	7.24	150.86	2.46e-07	7.87e-05	0.00754	5.51	7.05	132.65	5.04e-07	0.000147	0.02
18346	XM_021965083.1	LOC110762448	XP_021820775.1	850	putative SWI/SNF-related matrix-associated actin-dependent regulator of chromatin subfamily A member 3-like 1 isoform X2	8.39	10.37	1322.73	2.37e-05	0.00504	0.73	2.03	8.7	414.88	0.000396	0.03	1	3.08	9.07	538.97	0.000218	0.02	1
18566	XM_021965294.1	LOC110762634	XP_021820986.1	301	uncharacterized protein LOC110762634 isoform X1	24.63	3.5	11.33	1.28e-06	0.000809	0.04	15.6	2.7	6.52	0.000183	0.02	1	10.36	2.84	7.17	8.39e-05	0.00917	1
20376	XM_021967290.1	LOC110764344	XP_021822982.1	237	NAC domain-containing protein 41	24.02	2.71	6.56	9.03e-06	0.00285	0.28	25.42	2.79	6.91	4.39e-06	0.000941	0.13	19.77	2.83	7.1	3.25e-06	0.000731	0.1
23185	XM_021970436.1	LOC110767017	XP_021826128.1	786	serine/threonine-protein kinase-like protein CCR4	8.82	2.46	5.5	9.65e-05	0.01	1	25.93	3.98	15.78	2.11e-10	1.89e-07	6.46e-06	43.89	4.74	26.73	3.66e-14	5.94e-11	1.12e-09
23370	XM_021970692.1	LOC110767216	XP_021826384.1	533	uncharacterized protein LOC110767216	3.26	3.18	9.06	0.000108	0.01	1	5.16	3.88	14.76	1.51e-06	0.000383	0.05	3.51	3.41	10.63	2.61e-05	0.00412	0.8
23841	XM_021971179.1	LOC110767596	XP_021826871.1	234	dehydration-responsive element-binding protein 1A-like	36.19	2.54	5.81	2.37e-05	0.00504	0.73	37.36	2.5	5.67	2.79e-05	0.00419	0.86	66.62	3.27	9.67	4.15e-08	1.72e-05	0.00127
25773	XM_021973364.1	LOC110769402	XP_021829056.1	323	mitochondrial uncoupling protein 4-like	16.45	2.86	7.24	3.4e-05	0.00651	1	37.76	4.27	19.33	4.04e-10	3.5e-07	1.24e-05	68.69	4.93	30.52	5.15e-13	7.31e-10	1.58e-08
27448	XM_021975232.1	LOC110771007	XP_021830924.1	448	U-box domain-containing protein 21	20.64	1.91	3.77	0.000656	0.05	1	50.96	3.4	10.58	1.05e-09	7.47e-07	3.24e-05	72.69	3.77	13.66	1.33e-11	1.44e-08	4.1e-07
28954	XM_021976920.1	LOC110772480	XP_021832612.1	281	zinc finger protein ZAT10-like	124.45	2.4	5.26	3.64e-05	0.00676	1	98.02	2.27	4.84	8.73e-05	0.01	1	187.6	2.77	6.82	1.76e-06	0.00043	0.05
28982	XM_021976994.1	LOC110772557	XP_021832686.1	279	ethylene-responsive transcription factor ERF109-like	6.83	2.48	5.58	7.13e-05	0.01	1	45.4	5.31	39.68	1.24e-18	5.79e-15	3.8e-14	36.98	4.91	30.12	3.93e-16	8.12e-13	1.21e-11
30566	XM_021978747.1	LOC110774202	XP_021834439.1	858	DExH-box ATP-dependent RNA helicase DExH1 isoform X2	1.5	9.04	526.45	0.000244	0.02	1	2.61	9.24	606.24	0.000173	0.02	1	7.9	9.66	809.06	8.64e-05	0.00935	1
32725	XM_021946146.1	LOC110745967	XP_021801838.1	411	U-box domain-containing protein 28	16.04	2.4	5.29	0.000192	0.02	1	15.04	2.35	5.08	0.000259	0.02	1	27.2	3.14	8.83	9.44e-07	0.000255	0.03
34105	XM_021947716.1	LOC110747564	XP_021803408.1	142	uncharacterized protein LOC110747564	33.3	3.31	9.9	1.04e-05	0.00312	0.32	20.22	2.9	7.48	0.000106	0.01	1	99.81	4.73	26.46	2.15e-10	1.53e-07	6.61e-06
