# Supplementary material for: Transcriptome Analysis of Sweet Cherry (Prunus avium L.) Cultivar ‘Lapins’ upon Infection of Pseudomonas syringae pv. syringae
Source: MDPI journal article supplement (doi:10.3390/plants12213718), 2023-10-29
Supplement: s1 [file s1]

**Supplementary Table S1. Primers for DNA quantification and DEG validation.**

| Species                                         | Gene ID              | Gene name                                                                    | Forward Sequence         | Reverse Sequence         | Amplicon Size (bp) |
|-------------------------------------------------|----------------------|------------------------------------------------------------------------------|--------------------------|--------------------------|--------------------|
| <i>Pseudomonas syringae</i> pv. <i>syringae</i> | (Conserved sequence) | Glutathione-dependent formaldehyde-activating enzyme 1                       | CACTGCATAACCACGCCTG      | AATCCAGACCGTGGAACGC      | 210                |
| <i>Prunus avium</i>                             | XM_021955147.1       | protein SAR DEFICIENT 1                                                      | CATGCTGGGGCAATGTCAAGATCA | CCAGTACCGCATTCAAAGTTGGAG | 164                |
| <i>Prunus avium</i>                             | XM_021979071.1       | Golgin subfamily A member 4 (LOC110774526), transcript variant X4            | AGCAAGGGTCTTTGGCTTGT     | TGTCACGCTGTTGCACCAAT     | 156                |
| <i>Prunus avium</i>                             | XM_021969502.1       | E3 ubiquitin-protein ligase PRT6 (LOC110766214), transcript variant X2, mRNA | AAGCATGGCGTGTTACAGT      | AAACAGCTCCGCAAACACCA     | 107                |
| <i>Prunus avium</i>                             | XM_021962599.1       | CBS domain-containing protein CBSCBSPB1-like isoform X2                      | CGCTGCATACAATGCATGAC     | ATAGAGCTTGCGGCCTCATT     | 157                |
| <i>Prunus avium</i>                             | XM_021957676.1       | eIF-2-alpha kinase GCN2 isoform X2                                           | ATGGAACGACACCATGTGCT     | GGAGACATTAAGCGTCGCAA     | 110                |
| <i>Prunus avium</i>                             | XM_021962523.1       | Protein GIGANTEA isoform X3                                                  | TCTGCATTTCTGCGTGCAA      | ACCCAAAGGCTCATGCTGAA     | 163                |
| <i>Prunus avium</i>                             | XM_021952030.1       | Probable ADP-ribosylation factor GTPase-activating protein AGD14 isoform X2  | GCTGTCCAGTCGAAGCTGAT     | TGGAATGTGCTCTACCCTT      | 159                |
| <i>Prunus avium</i>                             | XM_021954766.1       | peptidyl-prolyl cis-trans isomerase CYP21-1                                  | GACCTGATTCCAATGGCTCACAGT | CAGTGTCCATGCCCTGAATTACCT | 105                |
| <i>Prunus avium</i>                             | XM_021947600.1       | Splicing factor 3B subunit 1                                                 | TGAGTTTGTTCAGCGAGGGAATG  | GGTTCTGACGTTCTGCACTTTGA  | 185                |
| <i>Prunus avium</i>                             | XM_021976055.1       | Actin-7                                                                      | ATGTGTTGAGGTGGGGTCAGTGAA | AAGATTAGGCAAGGCGAGGATGGA | 160                |

**Supplementary Table S2. DNA quantification in *Prunus avium* samples inoculated with different Pss strains.** DNA quantification of Pss and *Prunus avium* was performed in three local and distal samples from twigs inoculated with mock control and 11116\_b1, A1M197, and A1M3 Pss strains. Mean Cq value (performed in duplicate at least) and DNA concentrations are shown for each sample. Pss DNA presents the ratio between DNA quantification of Pss and *Prunus avium* in each biological replicate. ND, not detected; -, not determined. C+ Pss, purified A1M3 strain DNA; C+ *P. avium*, purified DNA from sweet cherry twig. C-, sterile water.

| Sample              | Treatment          | Replicate | Pss DNA detection |                      | <i>Prunus avium</i> DNA detection |                      | Pss DNA (ng/ng)      | Mean Pss DNA (ng/ng) |
|---------------------|--------------------|-----------|-------------------|----------------------|-----------------------------------|----------------------|----------------------|----------------------|
|                     |                    |           | Cq                | DNA (ng/ $\mu$ L)    | Cq                                | DNA (ng/ $\mu$ L)    |                      |                      |
| Local to the wound  | Mock               | R1        | ND                | 0                    | 23.3                              | $5.1 \times 10^{-2}$ | 0                    | $8.4 \times 10^{-7}$ |
|                     |                    | R2        | 35.65             | $2.1 \times 10^{-7}$ | 22.8                              | $8.3 \times 10^{-2}$ | $2.6 \times 10^{-6}$ |                      |
|                     |                    | R3        | ND                | 0                    | 23.8                              | $3.3 \times 10^{-2}$ | 0                    |                      |
|                     | 11116_b1           | R1        | 33.0              | $1.3 \times 10^{-6}$ | 24.2                              | $2.3 \times 10^{-2}$ | $5.9 \times 10^{-5}$ | $5.7 \times 10^{-5}$ |
|                     |                    | R2        | 33.6              | $8.7 \times 10^{-7}$ | 24.0                              | $2.8 \times 10^{-2}$ | $3.2 \times 10^{-5}$ |                      |
|                     |                    | R3        | 33.5              | $9.4 \times 10^{-7}$ | 24.9                              | $1.1 \times 10^{-2}$ | $8.4 \times 10^{-5}$ |                      |
|                     | A1M197             | R1        | 30.8              | $6.4 \times 10^{-6}$ | 23.4                              | $4.7 \times 10^{-2}$ | $1.4 \times 10^{-4}$ | $4.0 \times 10^{-4}$ |
|                     |                    | R2        | 32.3              | $2.3 \times 10^{-6}$ | 23.4                              | $4.8 \times 10^{-2}$ | $4.7 \times 10^{-5}$ |                      |
|                     |                    | R3        | 28.8              | $2.6 \times 10^{-5}$ | 24.1                              | $2.5 \times 10^{-2}$ | $1.1 \times 10^{-3}$ |                      |
|                     | A1M3               | R1        | 35.7              | $2.0 \times 10^{-7}$ | 23.3                              | $4.9 \times 10^{-2}$ | $4.1 \times 10^{-6}$ | $8.8 \times 10^{-6}$ |
|                     |                    | R2        | 33.9              | $7.5 \times 10^{-7}$ | 22.7                              | $8.9 \times 10^{-2}$ | $8.4 \times 10^{-6}$ |                      |
|                     |                    | R3        | 33.3              | $1.1 \times 10^{-6}$ | 22.8                              | $7.9 \times 10^{-2}$ | $1.4 \times 10^{-5}$ |                      |
| Distal to the wound | Mock               | R1        | ND                | 0                    | 30.7                              | $5.4 \times 10^{-5}$ | 0                    | 0                    |
|                     |                    | R2        | ND                | 0                    | 30.6                              | $6.1 \times 10^{-5}$ | 0                    |                      |
|                     |                    | R3        | ND                | 0                    | 29.6                              | $1.6 \times 10^{-4}$ | 0                    |                      |
|                     | 11116_b1           | R1        | ND                | 0                    | 28.2                              | $5.8 \times 10^{-4}$ | 0                    | 0                    |
|                     |                    | R2        | ND                | 0                    | 29.5                              | $1.7 \times 10^{-4}$ | 0                    |                      |
|                     |                    | R3        | ND                | 0                    | 29.9                              | $1.1 \times 10^{-4}$ | 0                    |                      |
|                     | A1M197             | R1        | 35.6              | $2.2 \times 10^{-7}$ | 28.4                              | $4.8 \times 10^{-4}$ | $4.7 \times 10^{-4}$ | $1.5 \times 10^{-4}$ |
|                     |                    | R2        | ND                | 0                    | 29.5                              | $1.7 \times 10^{-4}$ | 0                    |                      |
|                     |                    | R3        | ND                | 0                    | 28.2                              | $5.8 \times 10^{-4}$ | 0                    |                      |
|                     | A1M3               | R1        | ND                | 0                    | 27.8                              | $8.3 \times 10^{-4}$ | 0                    | $4.7 \times 10^{-1}$ |
|                     |                    | R2        | ND                | 0                    | 29.2                              | $2.2 \times 10^{-4}$ | 0                    |                      |
|                     |                    | R3        | 24.8              | $4.2 \times 10^{-4}$ | 28.9                              | $3.1 \times 10^{-4}$ | 1.4                  |                      |
|                     | C+ Pss             |           | 15.2              | $3.3 \times 10^{-1}$ | -                                 | -                    | -                    | -                    |
|                     | C+ <i>P. avium</i> |           | -                 | -                    | 28.7                              | $3.5 \times 10^{-4}$ | -                    | -                    |
|                     | C-                 |           | ND                | 0                    | ND                                | 0                    | -                    | -                    |
